# Supplementary material for: Highly regio- and diastereoselective construction of spirocyclopenteneoxindole phosphonates through a phosphine-catalyzed [3 + 2] annulation reaction
Source: Royal Society of Chemistry journal article supplement (doi:10.1039/c4ra12997k), 2014-01-01
Supplement: c4ra12997k1.pdf [file c4ra12997k1.pdf]

**Highly Regio- and Diastereoselective Construction of Spirocyclopenteneoxindole  
Phosphonates Through Phosphine-catalyzed [3+2] Annulation Reaction**

Chengbin Yu, Weiping Zheng, Junchen Zhan, Yuchao Sun, and Zhiwei Miao\*

State Key Laboratory and Institute of Elemento-Organic Chemistry, Collaborative Innovation Center of  
Chemical Science and Engineering (Tianjin), Nankai University, State Key Laboratory of Medicinal  
Chemical Biology (Nankai University), Weijin Road 94, Tianjin 300071 (P. R. China) *Fax: (+86)-22-  
2350-2351; e-mail: [miaozhiwei@nankai.edu.cn](mailto:miaozhiwei@nankai.edu.cn)*

## Supporting Information

### List of contents (pages)

|                                                             |     |
|-------------------------------------------------------------|-----|
| 1. General comments.....                                    | S1  |
| 2. The synthesis pathway of MBH phosphonates <b>2</b> ..... | S1  |
| 3. General procedure for the preparation of <b>3</b> .....  | S8  |
| 4. X-ray crystal structure of <b>2a</b> .....               | S53 |

#### General Comments.

Solvents were dried and distilled prior to use according to the standard methods. Unless otherwise indicated, all materials were obtained from commercial sources, and used as purchased without dehydration. Flash column chromatography was performed on silica gel (particle size 10-40  $\mu\text{m}$ , Ocean Chemical Factory of Qingdao, China). Nitrogen gas (99.999%) was purchased from Boc Gas Inc.  $^1\text{H}$  NMR,  $^{13}\text{C}$  NMR and  $^{31}\text{P}$  NMR spectra were recorded in  $\text{CDCl}_3$  at Bruker 400 MHz spectrometers, TMS served as internal standard ( $\delta = 0$  ppm) for  $^1\text{H}$  NMR and  $^{13}\text{C}$  NMR,  $\text{H}_3\text{PO}_4$  served as internal standard ( $\delta = 0$  ppm) for  $^{31}\text{P}$  NMR. The crystal structure was determined on a Bruker SMART 1000 CCD diffractometer. Mass spectra were recorded on a LCQ advantage spectrometer with ESI resource. HR-MS were recorded on APEXII and ZAB-HS spectrometer. Melting points were determined on a T-4 melting point apparatus (uncorrected). Optical rotations were recorded on a Perkin Elemer 241 Polarimeter.

#### The synthesis pathway of MBH phosphonates **2**:

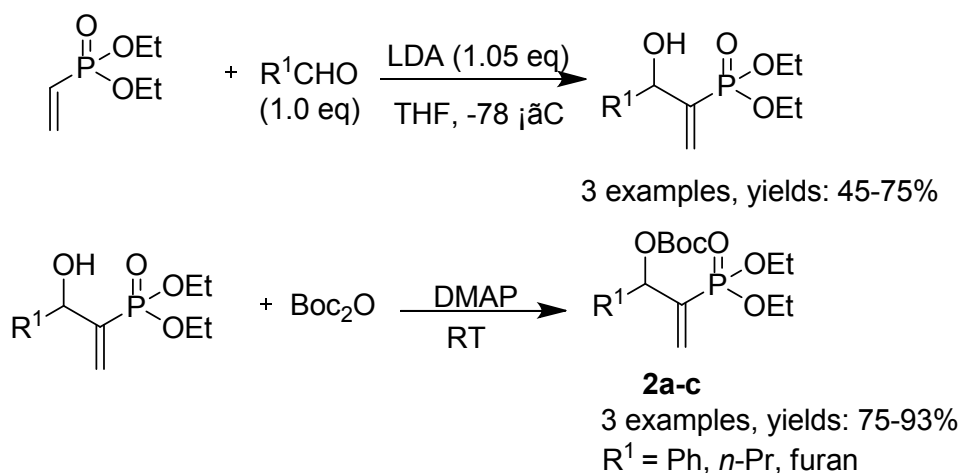

### General procedure for the preparation of 2:

A solution of LDA (22.0 mmol) in THF (50 mL) was added to a mixture of diethyl vinylphosphonate (20.0 mmol) and aldehyde (20.0 mmol) in THF (50 mL) at -78 °C. After being stirred for 60 min at this temperature, the reaction mixture was quenched with saturated NH<sub>4</sub>Cl (50 mL) and extracted with EtOAc (150 mL×3). Concentration and subsequent purification by silica gel column chromatography (EtOAc: hexane = 3: 2) afforded (1-hydroxy-vinyl) phosphonates in 45-75% yield.

To an ice-water cooled solution of (1-hydroxy-vinyl) phosphonates (10 mmol) in dry CH<sub>2</sub>Cl<sub>2</sub> (10 mL) were added Boc<sub>2</sub>O (11 mmol) and DMAP (0.5 mmol) in dry CH<sub>2</sub>Cl<sub>2</sub> (10 mL) over half an hour. The reaction mixture was stirred at room temperature overnight. To the solution was added 50 mL CH<sub>2</sub>Cl<sub>2</sub> and washed with aqueous hydrochloric acid (15%, 20 mL), saturated sodium bicarbonate (20 mL), and brine (20 mL) sequentially, dried over anhydrous sodium sulfate, concentrated, and purified by column chromatography to get the product **2a-c** in 75-93% yield.

### *tert*-Butyl (2-(diethoxyphosphoryl)-1-phenylallyl) carbonate (**2a**):

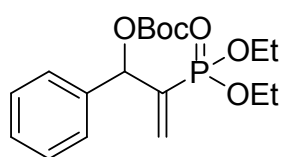

<sup>1</sup>H NMR (400 MHz, CDCl<sub>3</sub>): δ 7.29-7.45 (m, 5H), 6.33 (d, *J* = 22.4 Hz, 1H), 6.27 (d, *J* = 6.7 Hz, 1H), 6.18 (d, *J* = 45.2 Hz, 1H), 3.82-4.17 (m, 3H), 3.56-3.82 (m, 1H), 1.47 (s, 9H), 1.30 (t, *J* = 7.0 Hz, 3H), 1.09 (t, *J* = 7.0 Hz, 3H); <sup>13</sup>C NMR (101 MHz, CDCl<sub>3</sub>): δ 152.17, 139.78, 138.03, 137.04 (d, *J* = 3.1 Hz), 130.79 (d, *J* = 6.8 Hz), 128.51, 128.06 (d, *J* = 52.9 Hz), 82.49, 76.76 (d, *J* = 16.5 Hz), 62.04 (d, *J* = 5.3 Hz), 61.80 (d, *J* = 5.4 Hz), 27.68, 16.13 (d, *J* = 6.6 Hz), 15.88 (d, *J* = 6.9 Hz); <sup>31</sup>P NMR (162 MHz, CDCl<sub>3</sub>): δ 15.60.

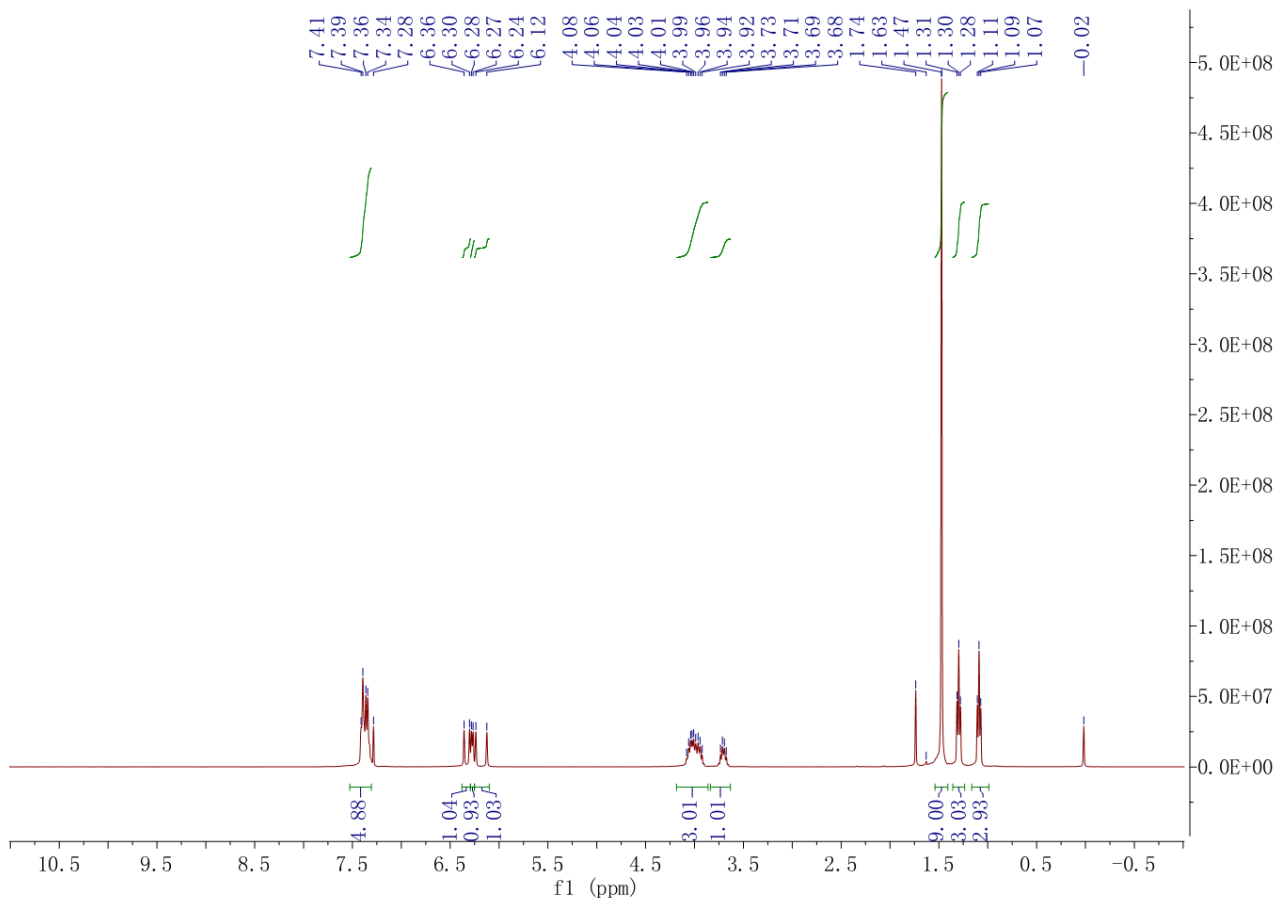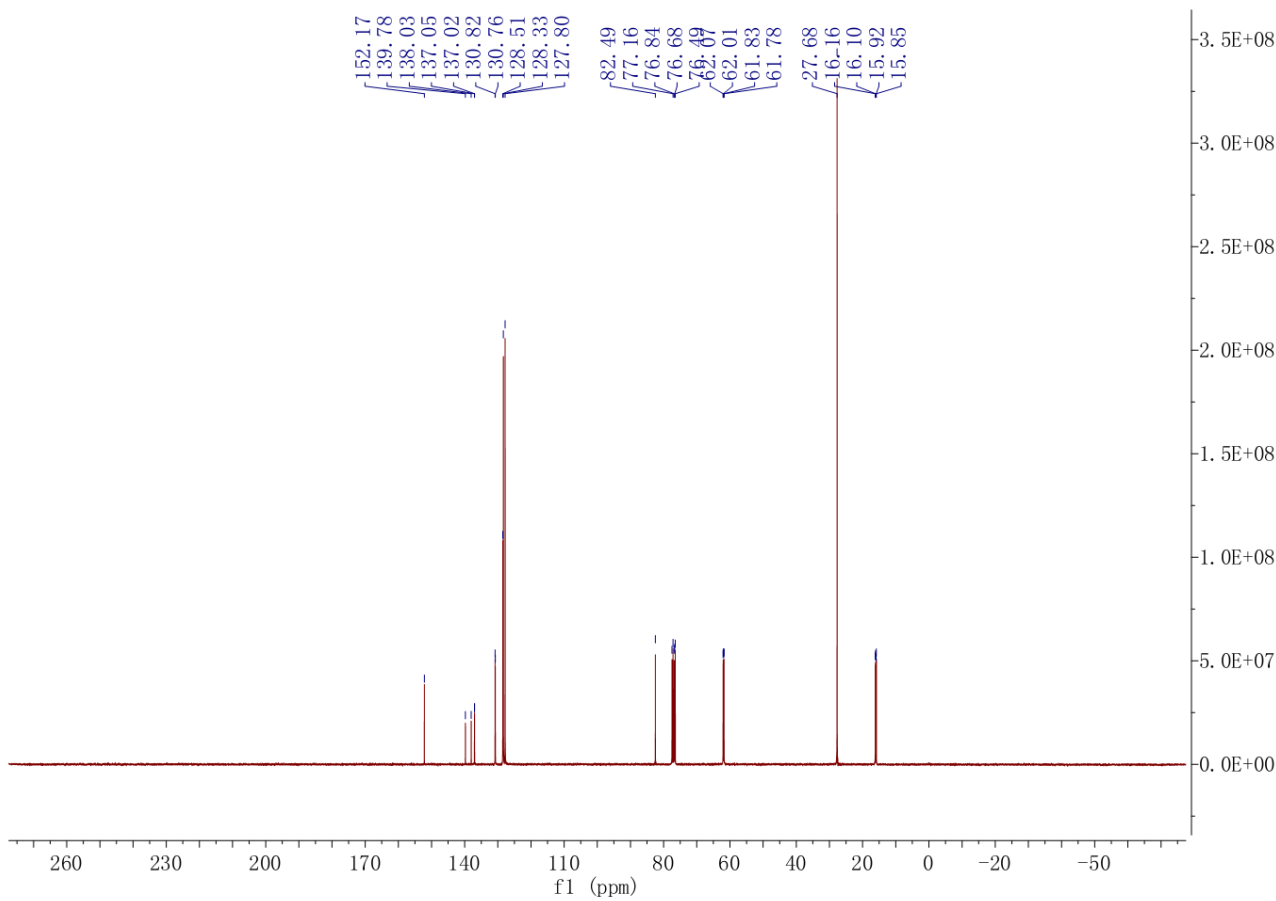

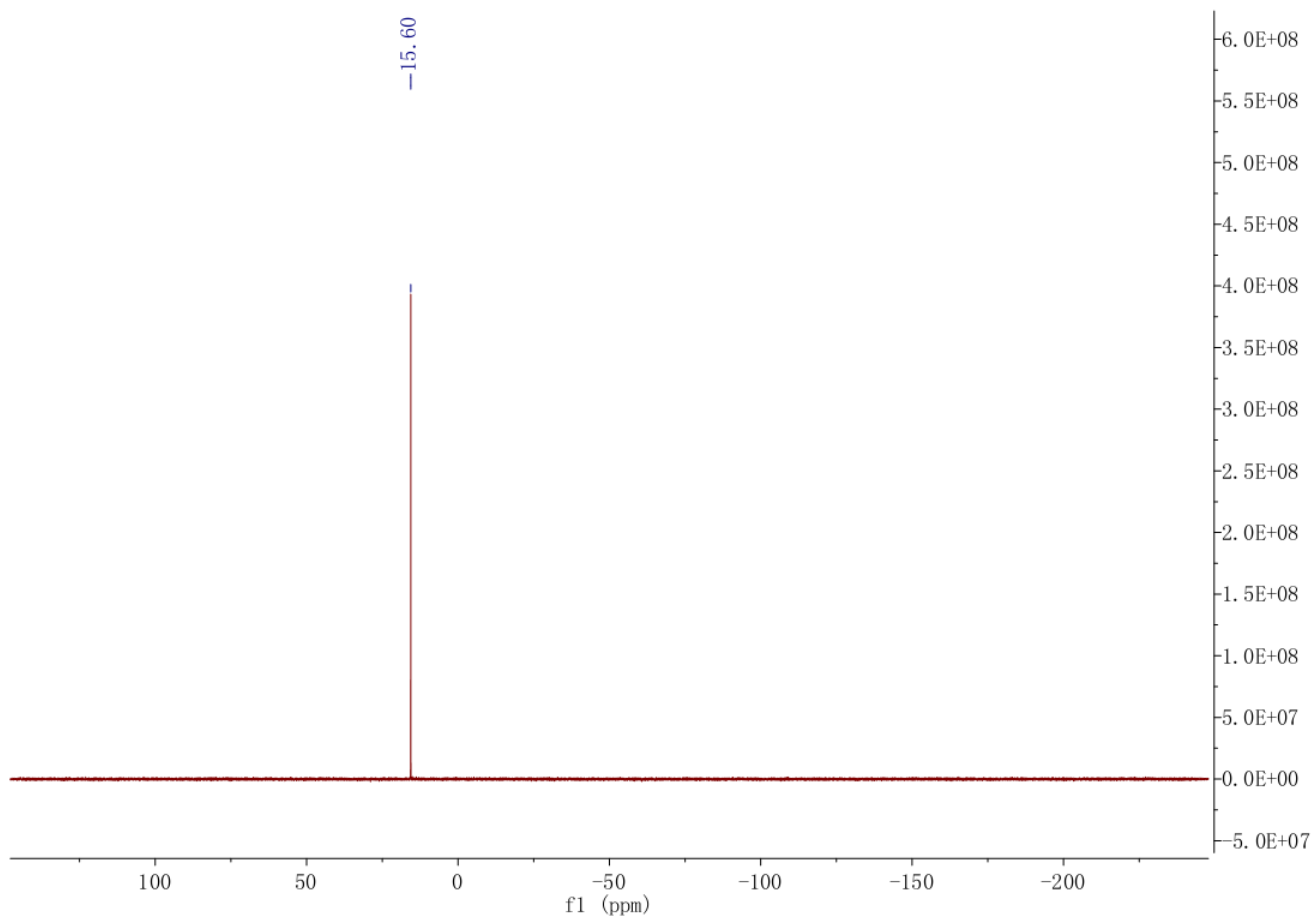

***tert*-Butyl (2-(diethoxyphosphoryl)-1-(furan-2-yl)allyl) carbonate(2b):**

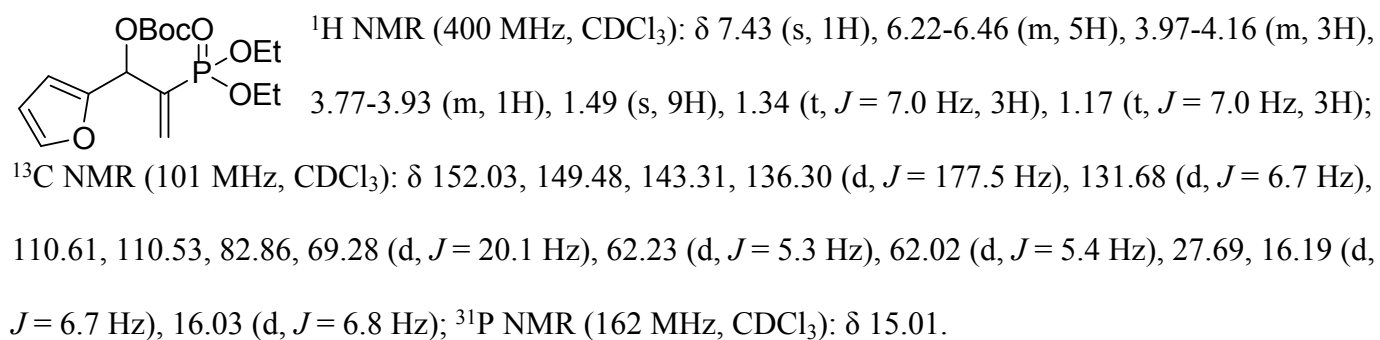

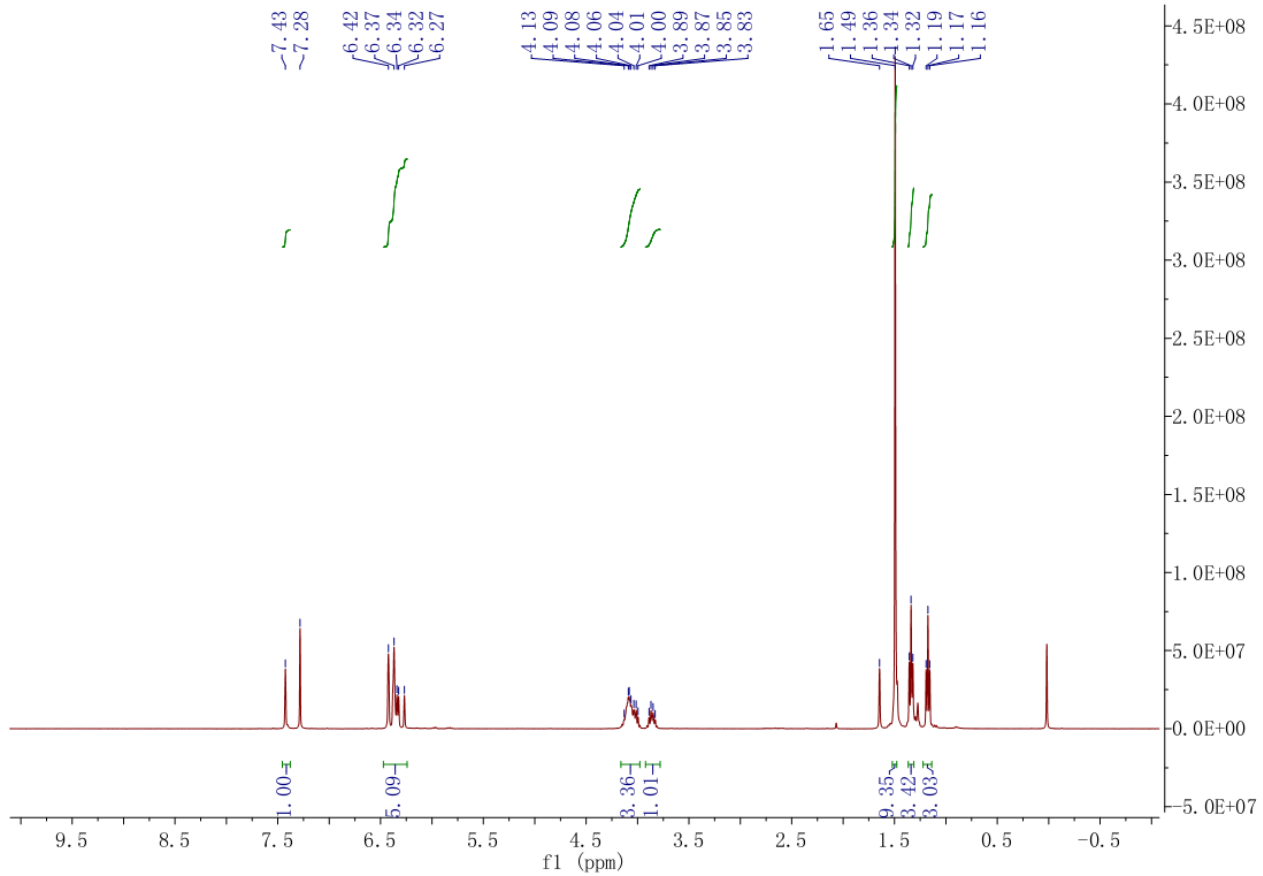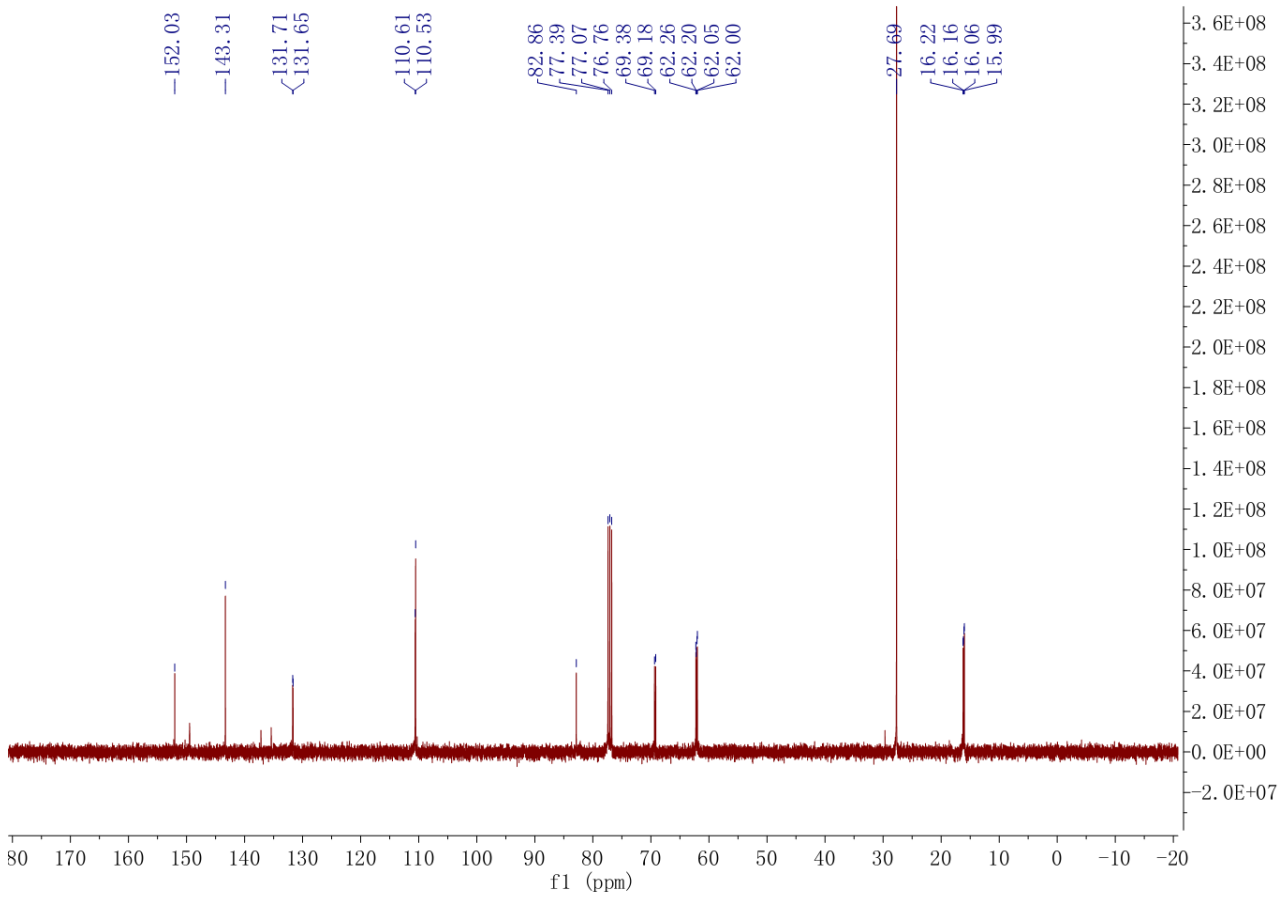

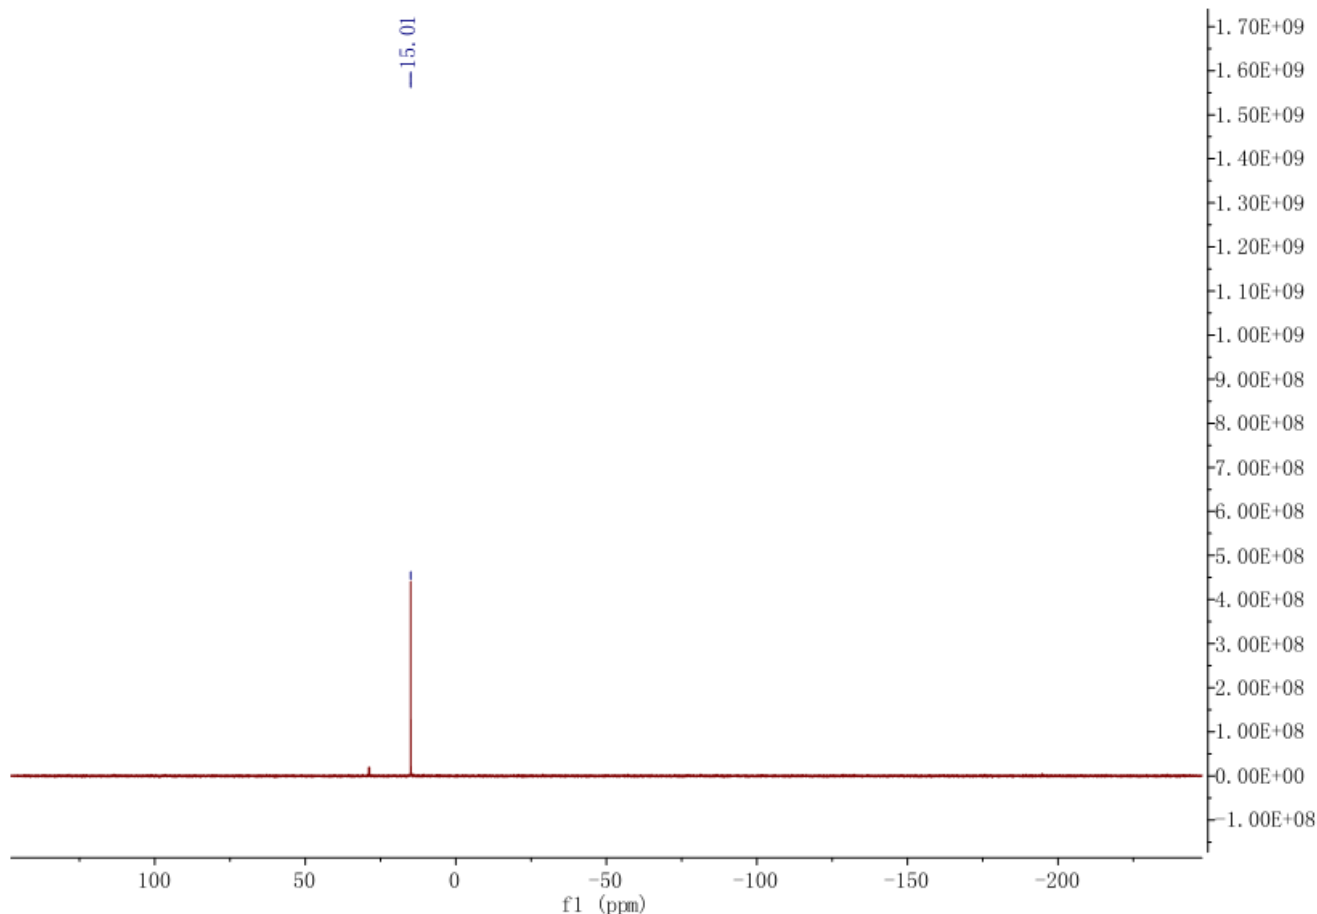

***tert*-Butyl (2-(diethoxyphosphoryl)hex-1-en-3-yl) carbonate(2c):**

$^1\text{H NMR}$  (400 MHz,  $\text{CDCl}_3$ ):  $\delta$  5.99-6.20 (m, 2H), 5.23 (td,  $J = 9.1, 4.0$  Hz, 1H), 3.73-4.35 (m, 4H), 1.64-1.87 (m, 2H), 1.47 (s, 9H), 1.32-1.36 (m, 8H), 0.92 (t,  $J = 7.4$  Hz, 3H).  $^{13}\text{C NMR}$  (101 MHz,  $\text{CDCl}_3$ ):  $\delta$  152.68, 139.51 (d,  $J = 174.6$  Hz), 130.05 (d,  $J = 6.7$  Hz), 82.05, 75.37 (d,  $J = 18.4$  Hz), 62.14 (d,  $J = 5.4$  Hz), 61.96 (d,  $J = 5.8$  Hz), 36.39, 27.75, 18.58, 16.27 (d,  $J = 3.3$  Hz), 16.20 (d,  $J = 3.3$  Hz), 13.62.  $^{31}\text{P NMR}$  (162 MHz,  $\text{CDCl}_3$ ):  $\delta$  16.31.

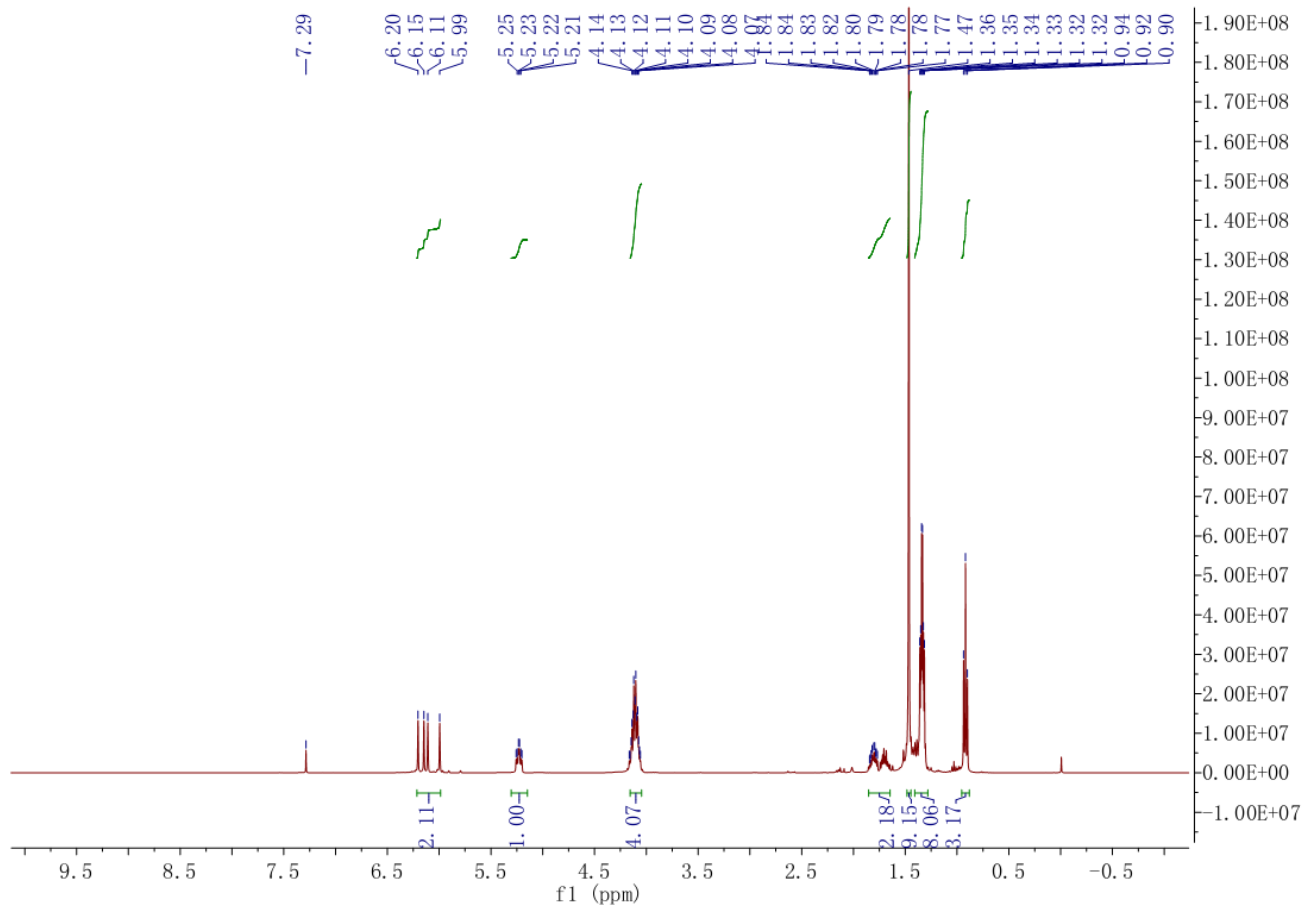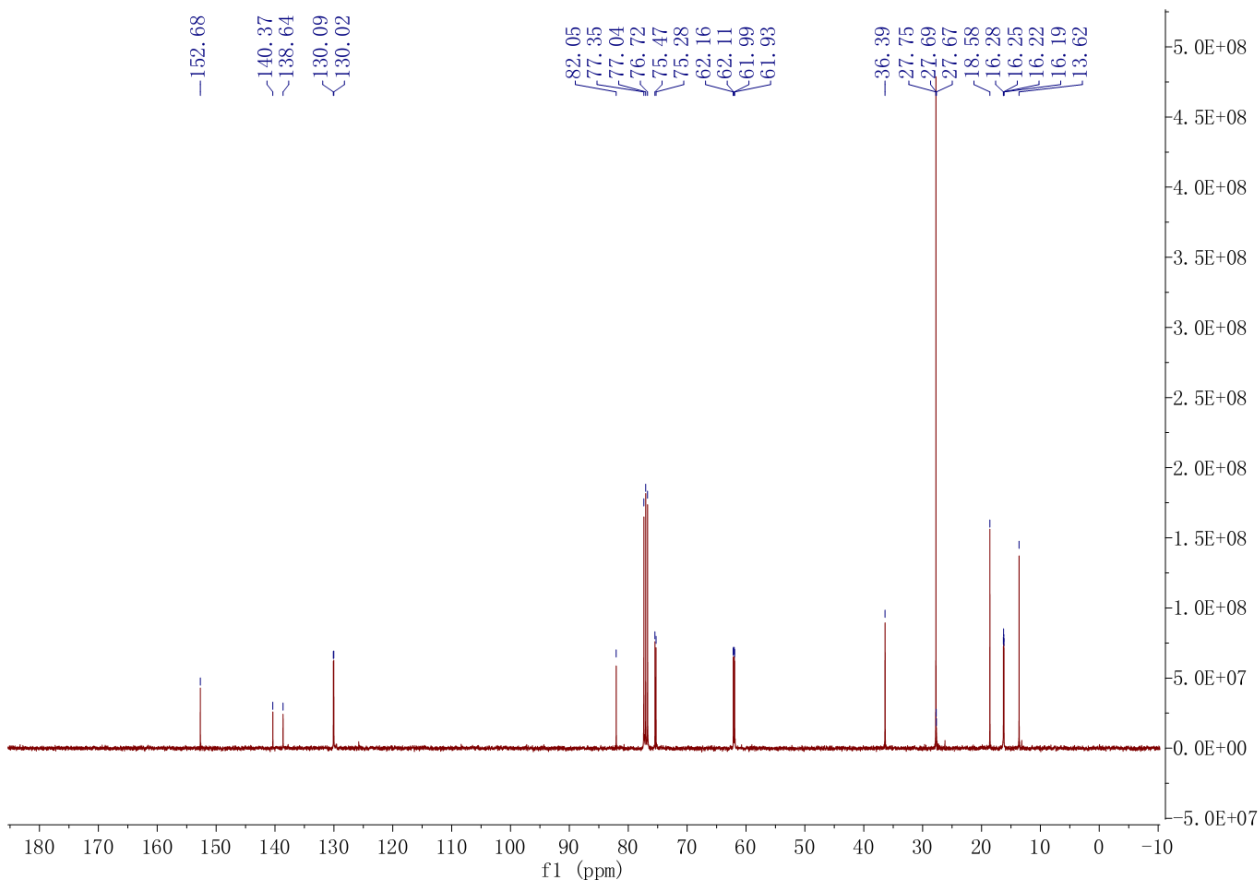



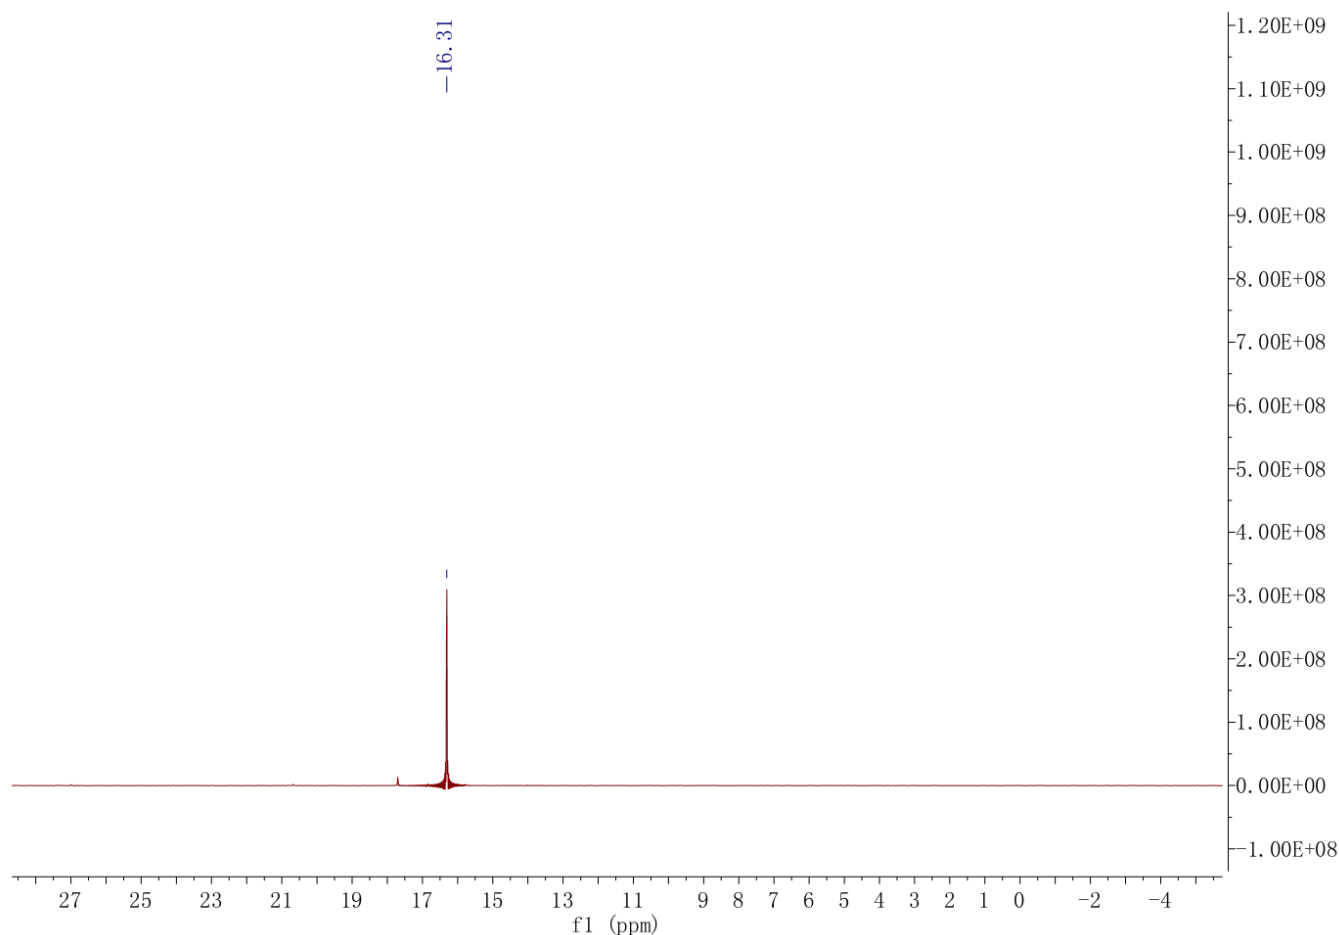

### General procedure for the preparation of **3**:

A solution of MBH phosphonates **2** (0.13 mmol), isatyridene malononitrile **1** (0.1 mmol) and catalyst Ph<sub>2</sub>PEt (0.015 mmol) in toluene (2.0 mL) was stirred at 50°C under N<sub>2</sub> atmosphere. After isatyridene malononitrile **1** was completely consumed (monitored by TLC), the solvent was removed under reduced pressure and the residue was chromatographed on silica gel (elution with petroleum ether/EtOAc = 1:1) to afford product as a white solid.

# Diethyl(5,5-dicyano-1'-methyl-2'-oxo-4-phenylspiro[cyclopent[2]ene-1,3'-indolin]-3-yl)phosphonate

(3a):

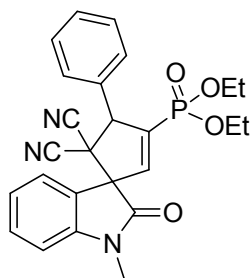

White solid; mp 233 °C.  $^1\text{H}$  NMR (400 MHz,  $\text{CDCl}_3$ ):  $\delta$  7.70 (d,  $J = 7.6$  Hz, 1H), 7.60 (d,  $J = 4.5$  Hz, 2H), 7.50 (dd,  $J = 16.7, 5.7$  Hz, 4H), 7.25 (t,  $J = 7.7$  Hz, 1H), 6.99 (d,  $J = 7.8$  Hz, 1H), 6.57 (dd,  $J = 11.0, 2.2$  Hz, 1H), 5.51 (s, 1H), 4.00-4.17 (m, 2H), 3.80-4.01 (m, 2H), 3.34 (s, 3H), 1.31 (t,  $J = 7.0$  Hz, 3H), 1.12 (t,  $J = 7.0$  Hz, 3H);  $^{13}\text{C}$  NMR (101 MHz,  $\text{CDCl}_3$ ):  $\delta$  171.00, 145.82 (d,  $J = 12.4$  Hz), 144.08, 140.18 (d,  $J = 190.8$  Hz), 132.51, 131.46, 130.18, 129.74, 128.55, 126.93, 123.95, 123.09, 112.73, 111.84, 109.19, 65.58 (d,  $J = 18.7$  Hz), 62.85 (d,  $J = 5.9$  Hz), 62.74 (d,  $J = 6.5$  Hz), 60.81 (d,  $J = 15.1$  Hz), 52.87 (d,  $J = 13.0$  Hz), 27.13, 16.23 (d,  $J = 6.5$  Hz), 16.03 (d,  $J = 6.5$  Hz);  $^{31}\text{P}$  NMR (162 MHz,  $\text{CDCl}_3$ ):  $\delta$  9.41; HRMS calculated  $[\text{M}+\text{Na}]^+$  for  $\text{C}_{25}\text{H}_{24}\text{N}_3\text{O}_4\text{P}$ : 484.1402, found: 484.1399.

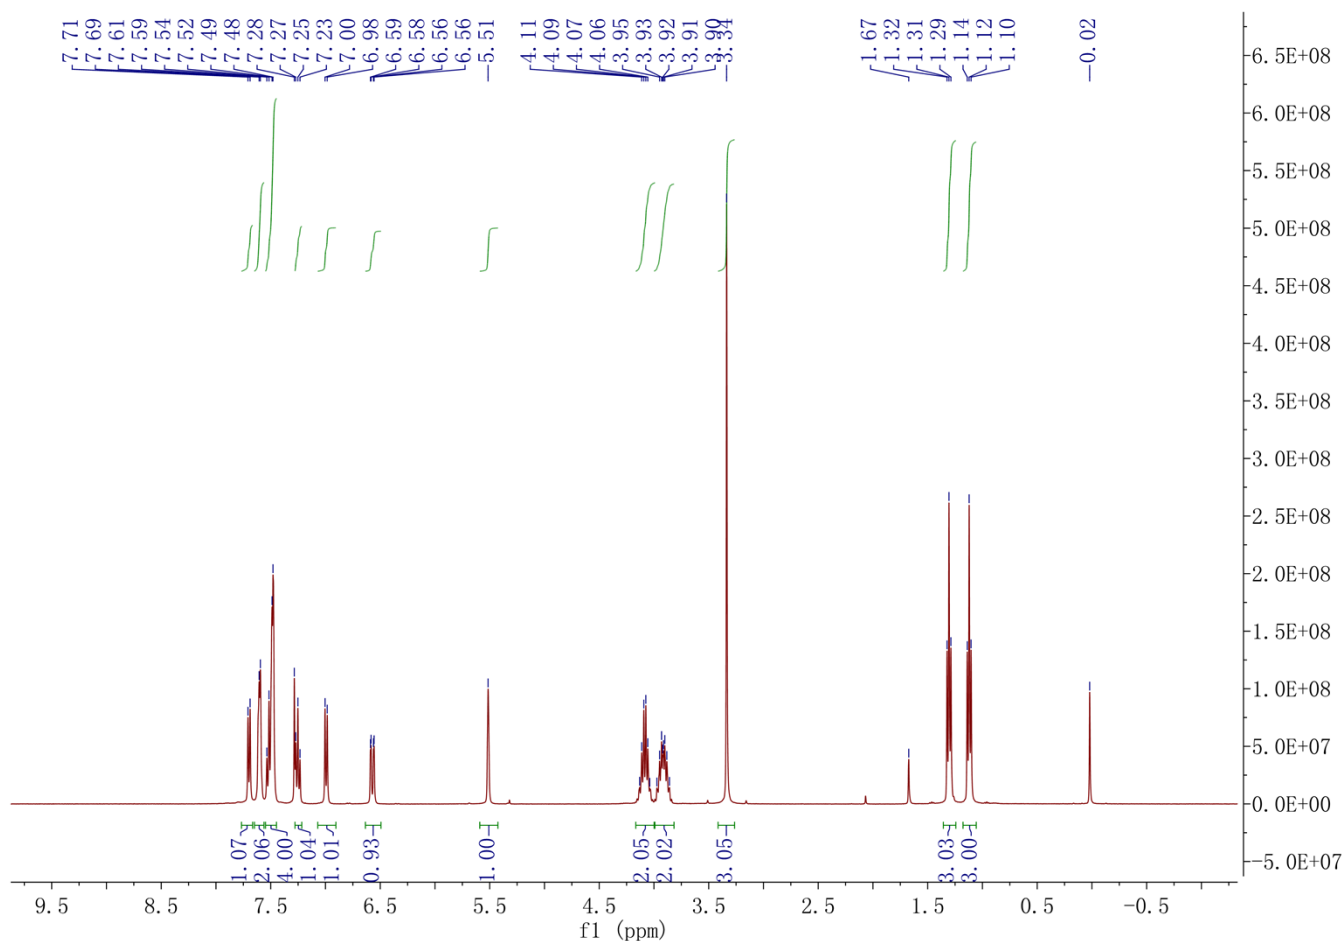

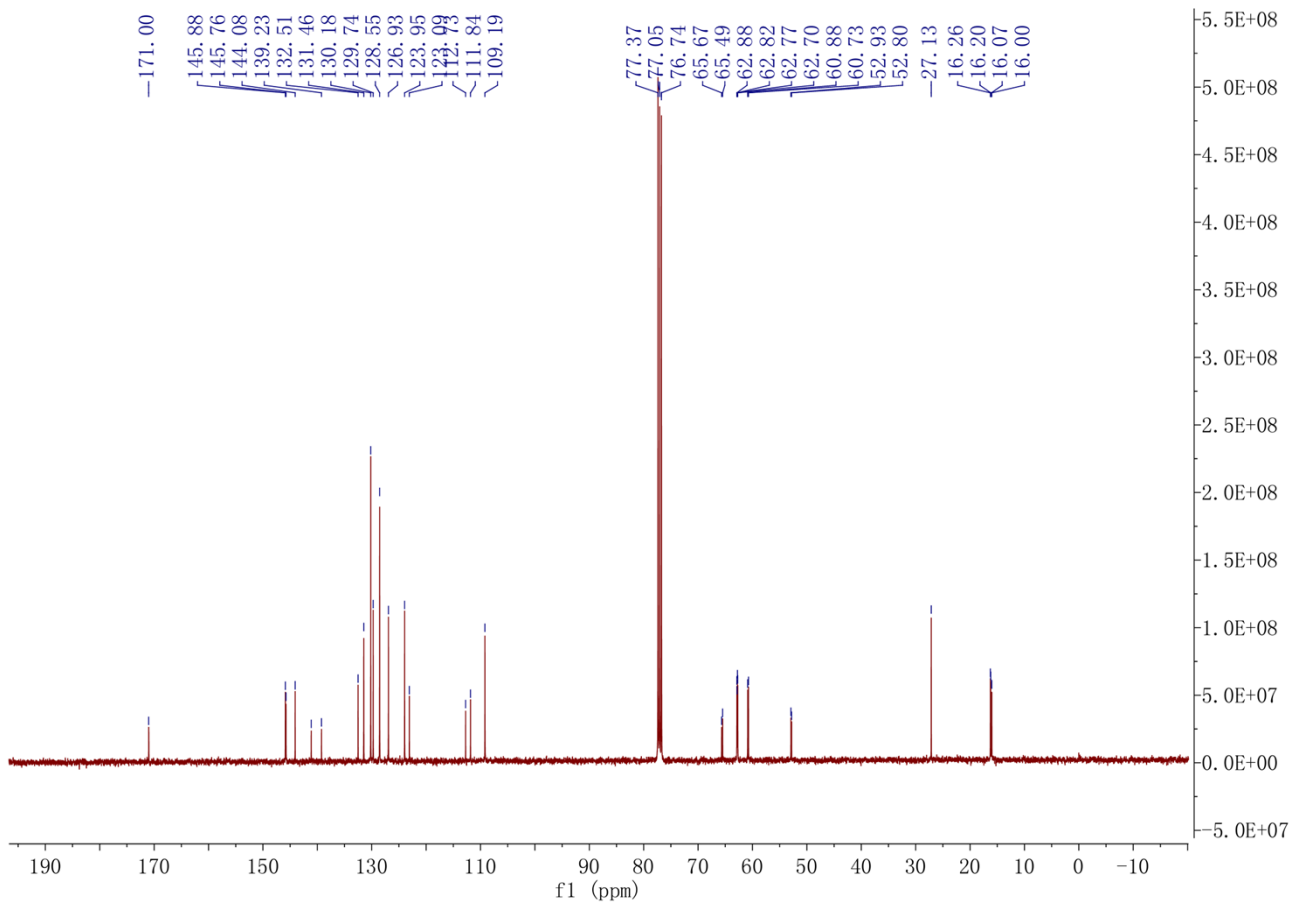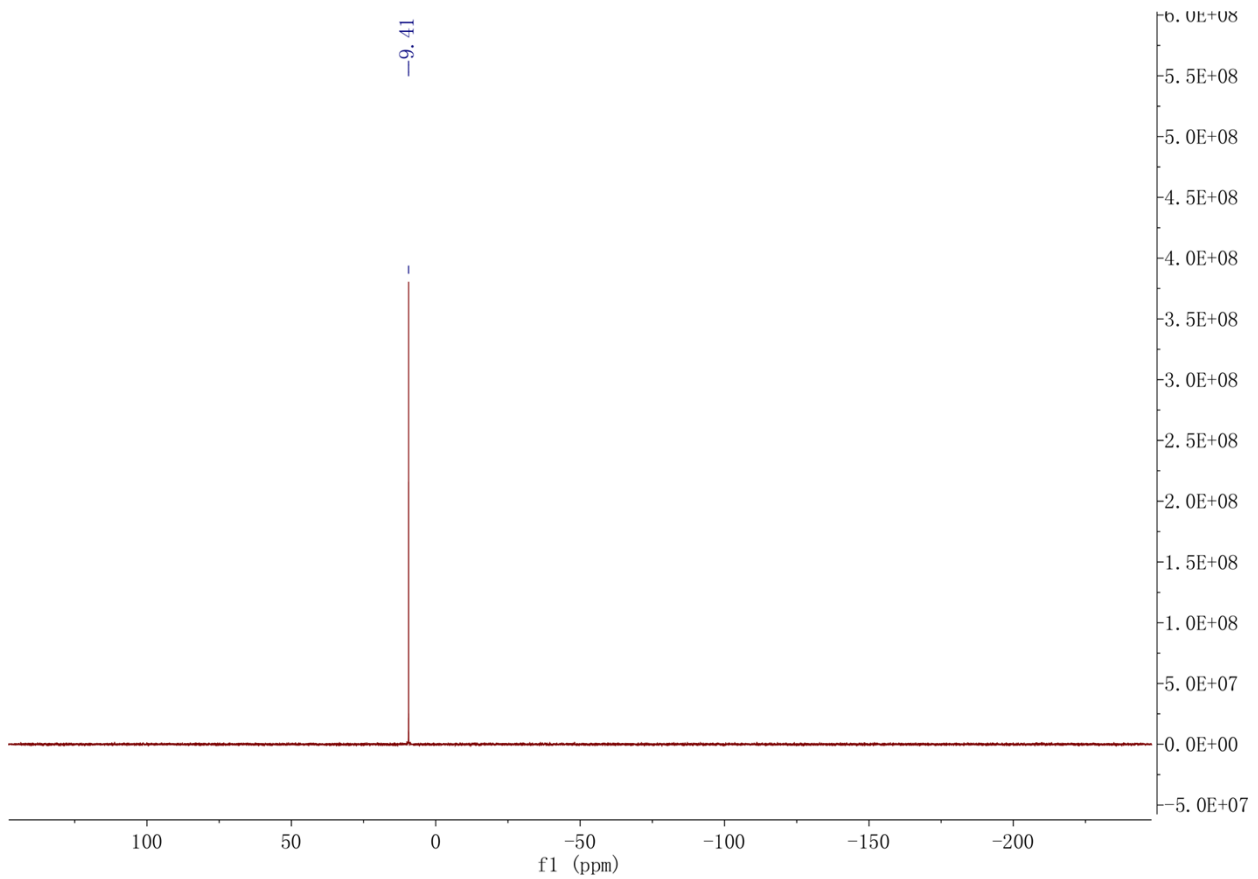

**Diethyl(5'-bromo-5,5-dicyano-1'-methyl-2'-oxo-4-phenylspiro[cyclopent[2]ene-1,3'-indolin]-3-yl)phosphonate (3b):**

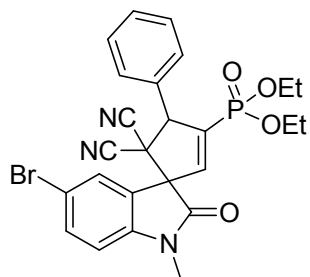

White solid; mp 185 °C.  $^1\text{H}$  NMR (400 MHz,  $\text{CDCl}_3$ ):  $\delta$  7.81 (s, 1H), 7.64 (dt,  $J = 9.8, 4.9$  Hz, 1H), 7.55-7.61 (m, 2H), 7.40-7.53 (m, 3H), 6.88 (d,  $J = 8.3$  Hz, 1H), 6.54 (dd,  $J = 10.9, 2.5$  Hz, 1H), 5.49 (s, 1H), 4.01-4.19 (m, 2H), 3.82-4.00 (m, 2H), 3.31 (s, 3H), 1.29 (t,  $J = 7.0$  Hz, 3H), 1.14 (t,  $J = 7.0$  Hz, 3H);  $^{13}\text{C}$  NMR (101 MHz,  $\text{CDCl}_3$ ):  $\delta$  170.47, 144.86 (d,  $J = 12.7$  Hz), 143.14, 140.87 (d,  $J = 190.6$  Hz), 134.40, 132.26, 130.17, 130.10, 129.85, 128.59, 124.96, 116.54, 112.47, 111.63, 110.59, 65.31 (d,  $J = 19.2$  Hz), 62.85 (t,  $J = 5.9$  Hz), 60.89 (d,  $J = 14.7$  Hz), 52.73 (d,  $J = 13.0$  Hz), 27.24, 16.22 (d,  $J = 6.4$  Hz), 16.05 (d,  $J = 6.5$  Hz);  $^{31}\text{P}$  NMR (162 MHz,  $\text{CDCl}_3$ ):  $\delta$  9.02. HRMS calculated  $[\text{M}+\text{Na}]^+$  for  $\text{C}_{25}\text{H}_{23}\text{BrN}_3\text{O}_4\text{P}$ : 562.0507, found: 562.0504.

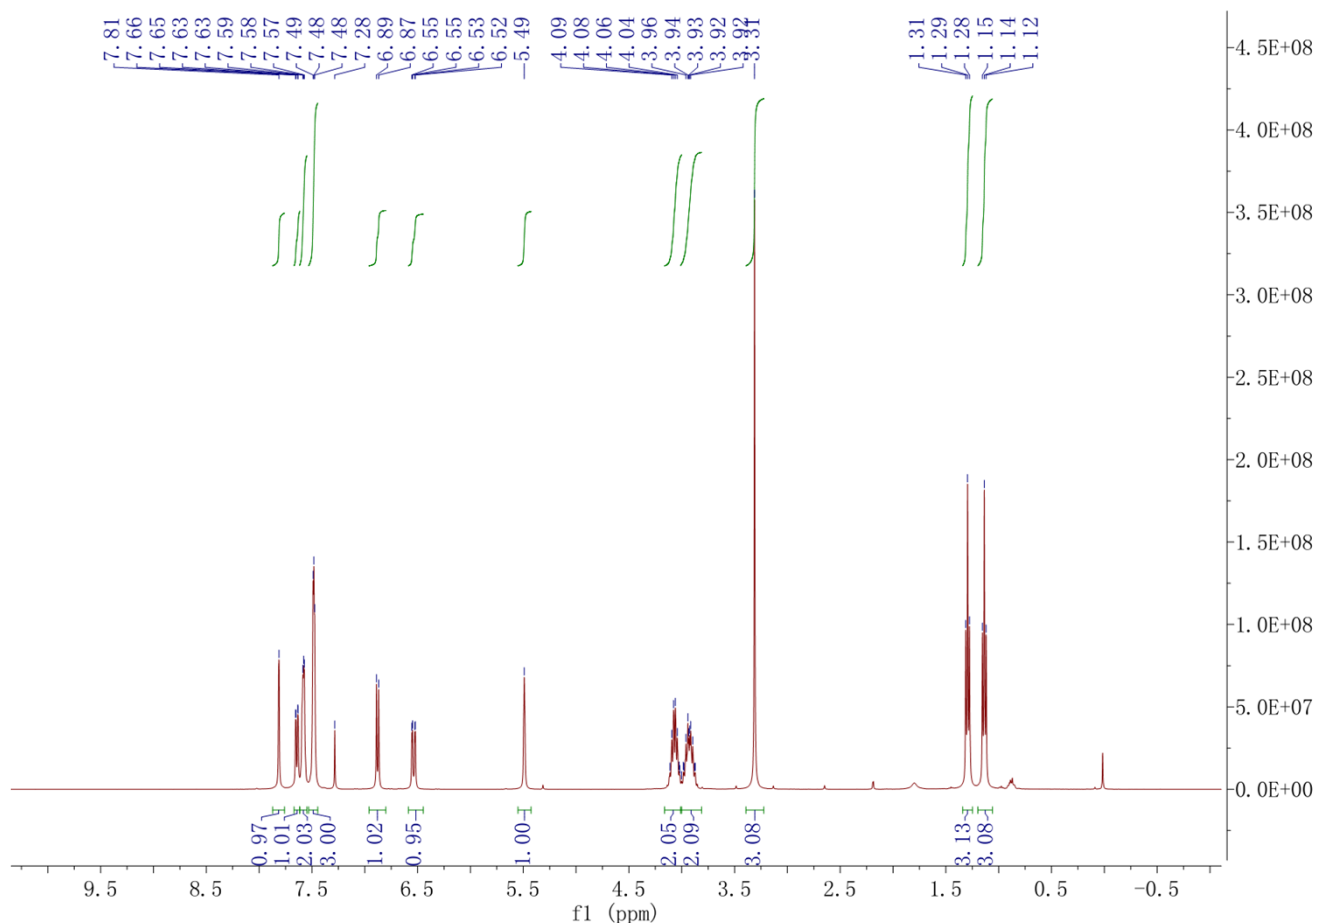

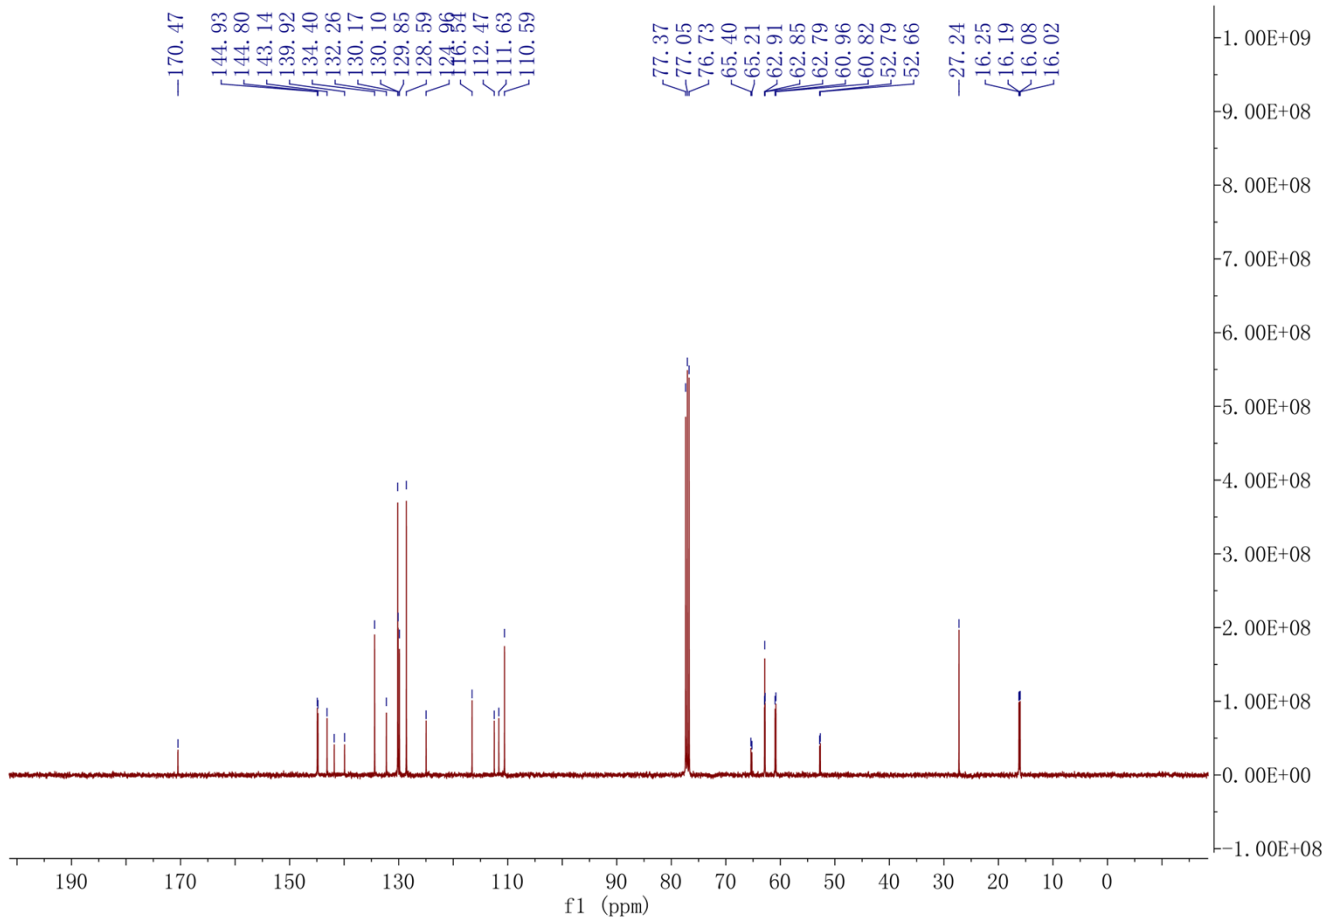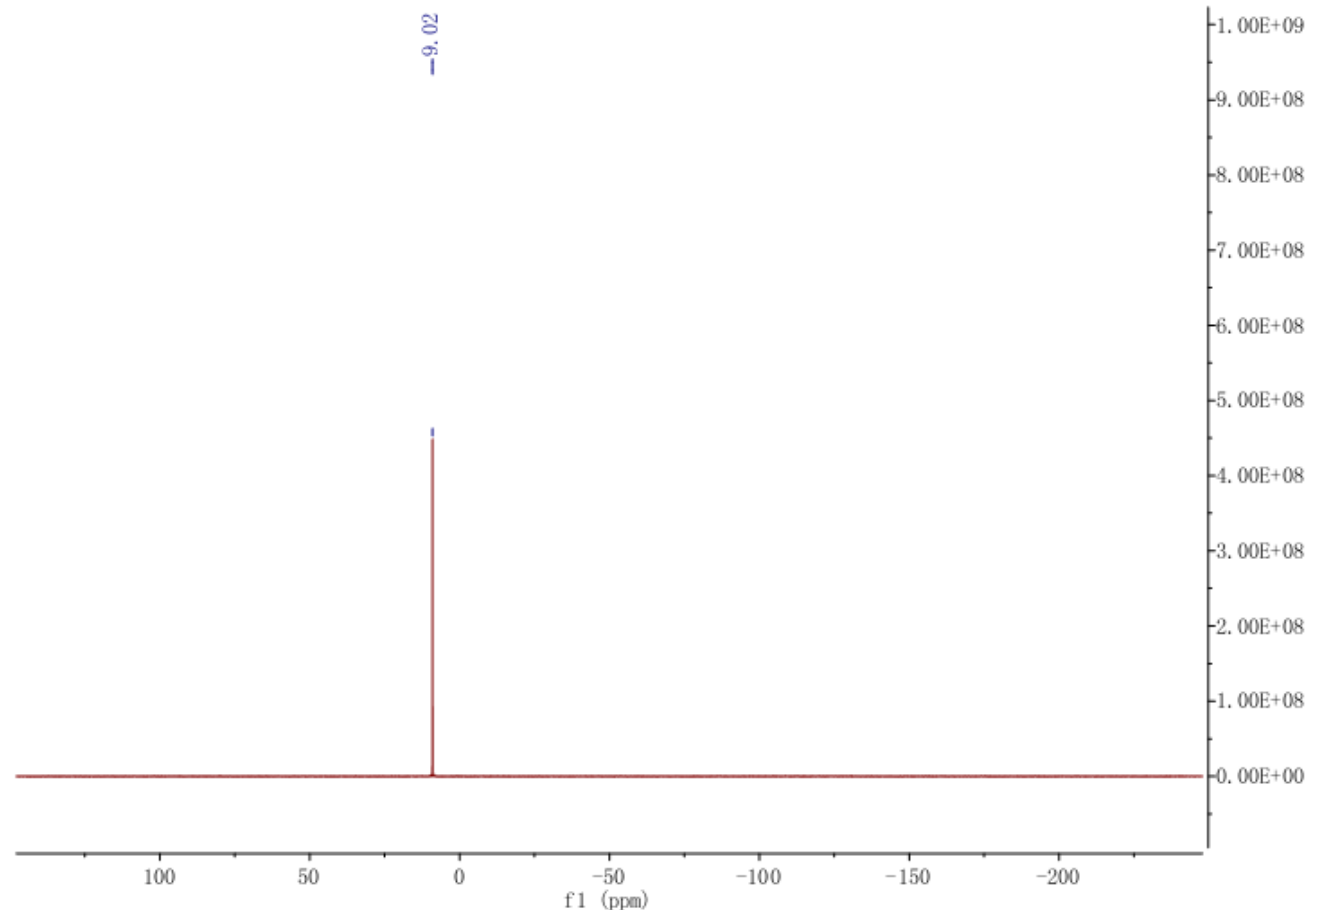

**Diethyl(5'-chloro-5,5-dicyano-1'-methyl-2'-oxo-4-phenylspiro[cyclopent[2]ene-1,3'-indolin]-3-yl)phosphonate (3c):**

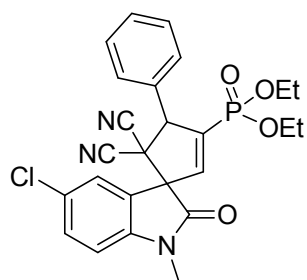

White solid; mp 225 °C.  $^1\text{H}$  NMR (400 MHz,  $\text{CDCl}_3$ ):  $\delta$  7.69 (d,  $J = 1.7$  Hz, 1H), 7.59 (dd,  $J = 6.2, 2.7$  Hz, 2H), 7.44-7.53 (m, 4H), 6.93 (d,  $J = 8.4$  Hz, 1H), 6.54 (dd,  $J = 11.0, 2.6$  Hz, 1H), 5.50 (s, 1H), 4.02-4.18 (m, 2H), 3.85-4.01 (m, 2H), 3.32 (s, 3H), 1.30 (t,  $J = 7.1$  Hz, 3H), 1.14 (t,  $J = 7.1$  Hz, 3H);  $^{13}\text{C}$  NMR (101 MHz,  $\text{CDCl}_3$ ):  $\delta$  170.57 (d,  $J = 2.3$  Hz), 144.89 (d,  $J = 12.8$  Hz), 142.64, 140.82 (d,  $J = 190.6$  Hz), 132.25, 131.50, 130.17, 129.86, 129.47, 128.59, 127.36, 124.60, 112.47, 111.64, 110.17, 65.37 (d,  $J = 19.0$  Hz), 62.86 (t,  $J = 6.0$  Hz), 60.87 (d,  $J = 14.9$  Hz), 52.70 (d,  $J = 12.9$  Hz), 27.27, 16.23 (d,  $J = 6.4$  Hz), 16.05 (d,  $J = 6.5$  Hz);  $^{31}\text{P}$  NMR (162 MHz,  $\text{CDCl}_3$ ):  $\delta$  9.05. HRMS calculated  $[\text{M}+\text{Na}]^+$  for  $\text{C}_{25}\text{H}_{23}\text{ClN}_3\text{O}_4\text{P}$ : 518.1012, found: 518.1005.

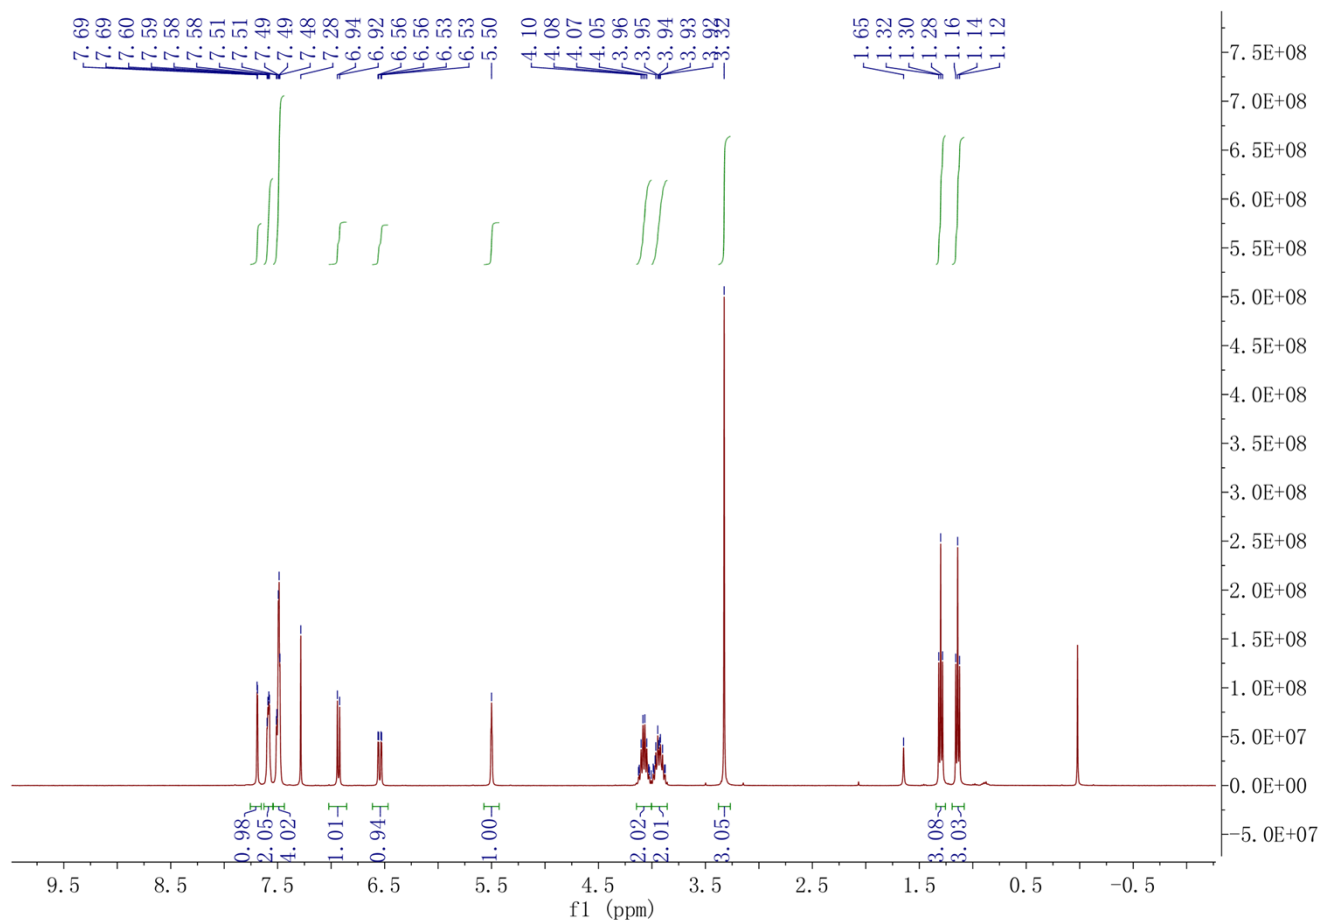

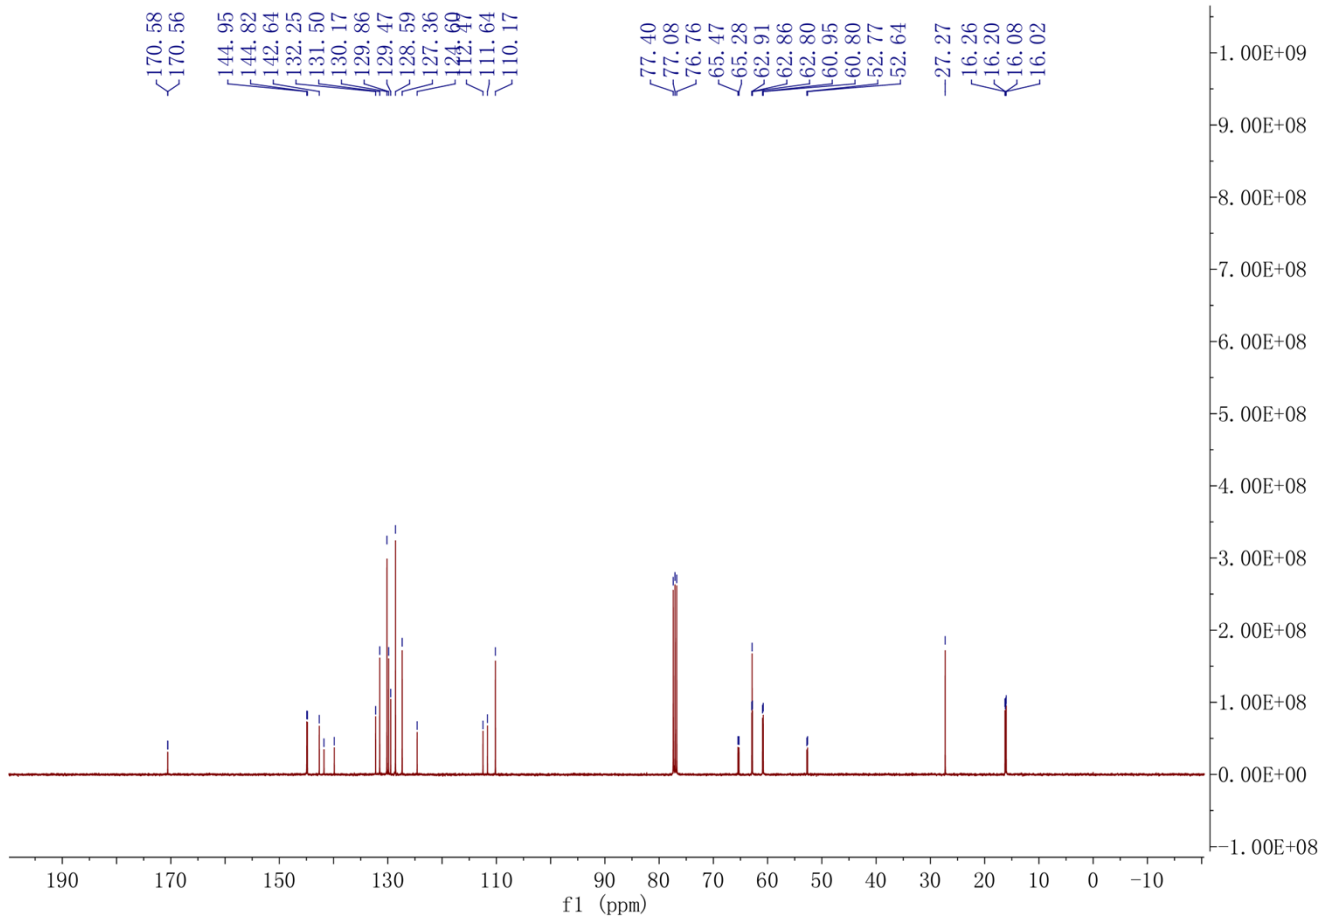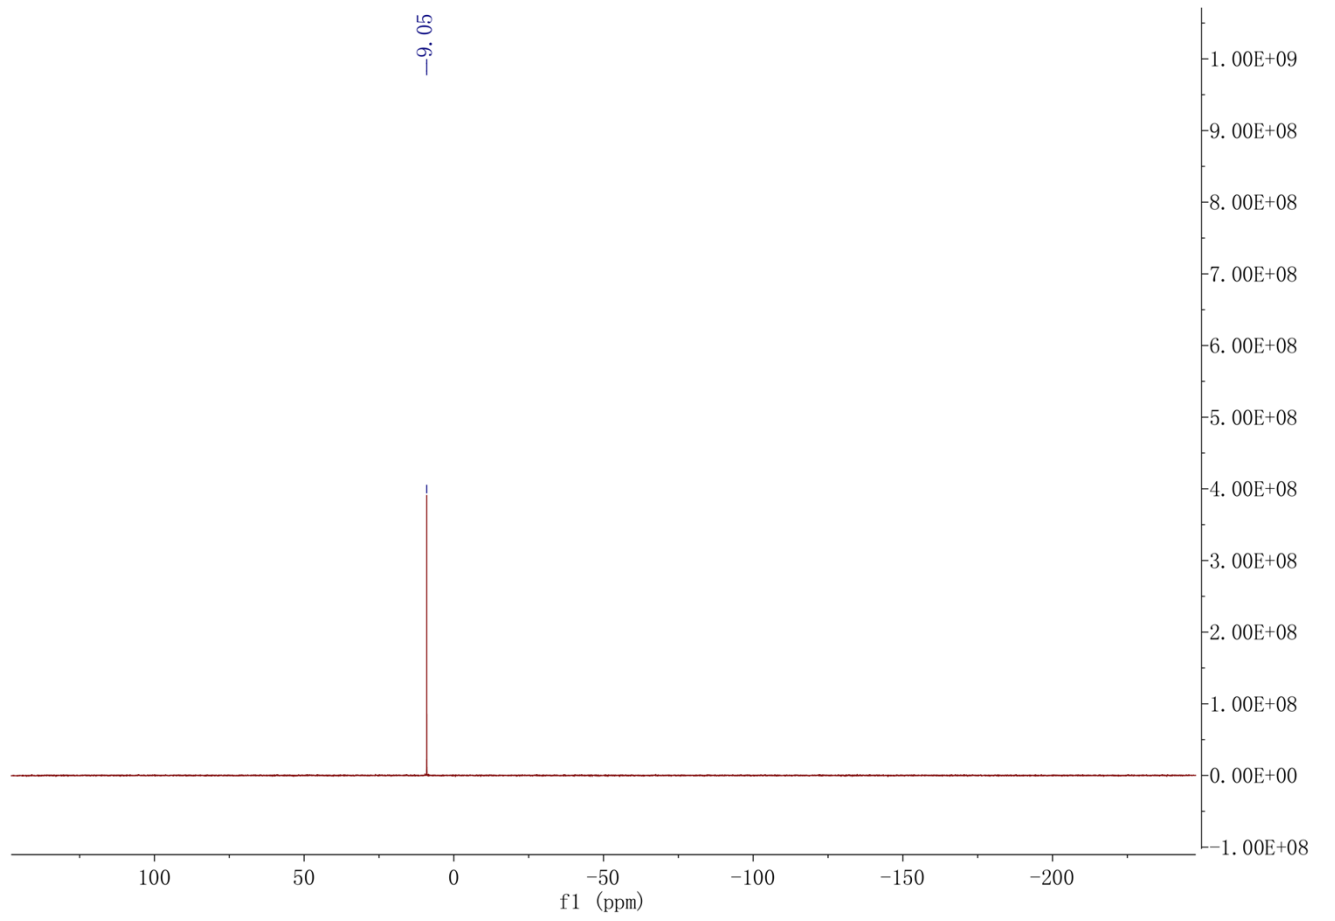

**Diethyl(5,5-dicyano-1',5'-dimethyl-2'-oxo-4-phenylspiro[cyclopent[2]ene-1,3'-indolin]-3-yl)phosphonate (3d):**

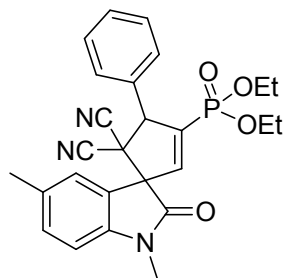

White solid; mp 195 °C.  $^1\text{H}$  NMR (400 MHz,  $\text{CDCl}_3$ ):  $\delta$  7.60 (dd,  $J = 6.5, 2.8$  Hz, 2H), 7.49 (dd,  $J = 8.7, 4.7$  Hz, 4H), 7.30 (d,  $J = 8.2$  Hz, 1H), 6.88 (d,  $J = 8.0$  Hz, 1H), 6.56 (dd,  $J = 11.0, 2.7$  Hz, 1H), 5.51 (t,  $J = 2.2$  Hz, 1H), 4.01-4.18 (m, 2H), 3.82-4.00 (m, 2H), 3.31 (s, 3H), 2.42 (s, 3H), 1.30 (t,  $J = 7.1$  Hz, 3H), 1.12 (t,  $J =$

7.1 Hz, 3H);  $^{13}\text{C}$  NMR (101 MHz,  $\text{CDCl}_3$ ):  $\delta$  170.93, 146.02 (d,  $J = 12.4$  Hz), 141.67, 139.99 (d,  $J = 190.7$  Hz), 133.73, 132.61, 131.68, 130.20, 129.70, 128.51, 127.68, 123.13, 112.79, 111.88, 108.87, 65.65 (d,  $J = 19.1$  Hz), 62.81 (d,  $J = 6.0$  Hz), 62.69 (d,  $J = 6.3$  Hz), 60.85 (d,  $J = 15.0$  Hz), 52.89 (d,  $J = 13.0$  Hz), 27.12, 21.15, 16.22 (d,  $J = 6.4$  Hz), 16.02 (d,  $J = 6.6$  Hz);  $^{31}\text{P}$  NMR (162 MHz,  $\text{CDCl}_3$ ):  $\delta$  9.49. HRMS calculated  $[\text{M}+\text{Na}]^+$  for  $\text{C}_{26}\text{H}_{26}\text{N}_3\text{O}_4\text{P}$ : 498.1559, found: 498.1561.

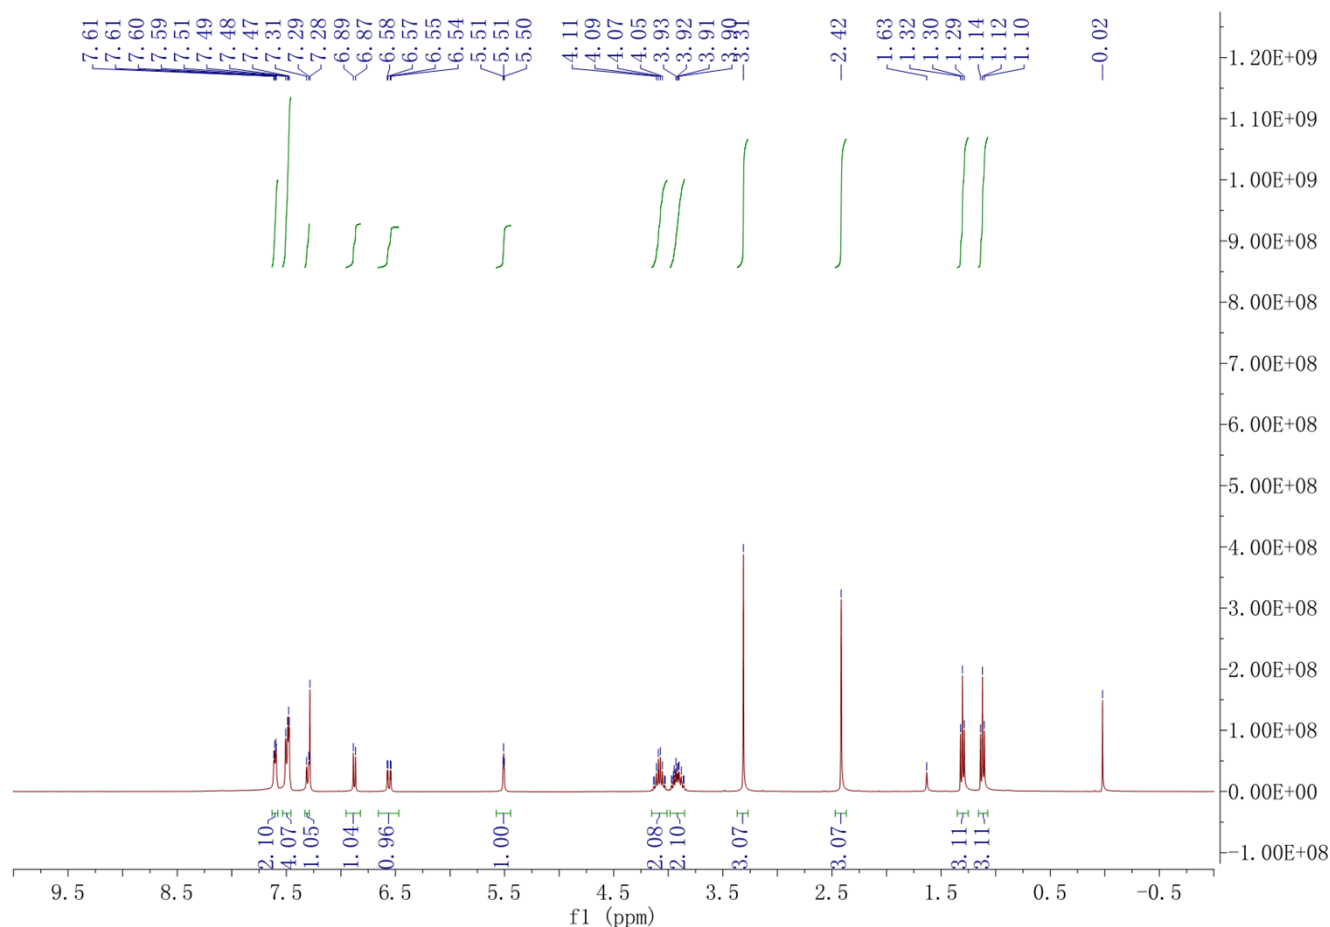



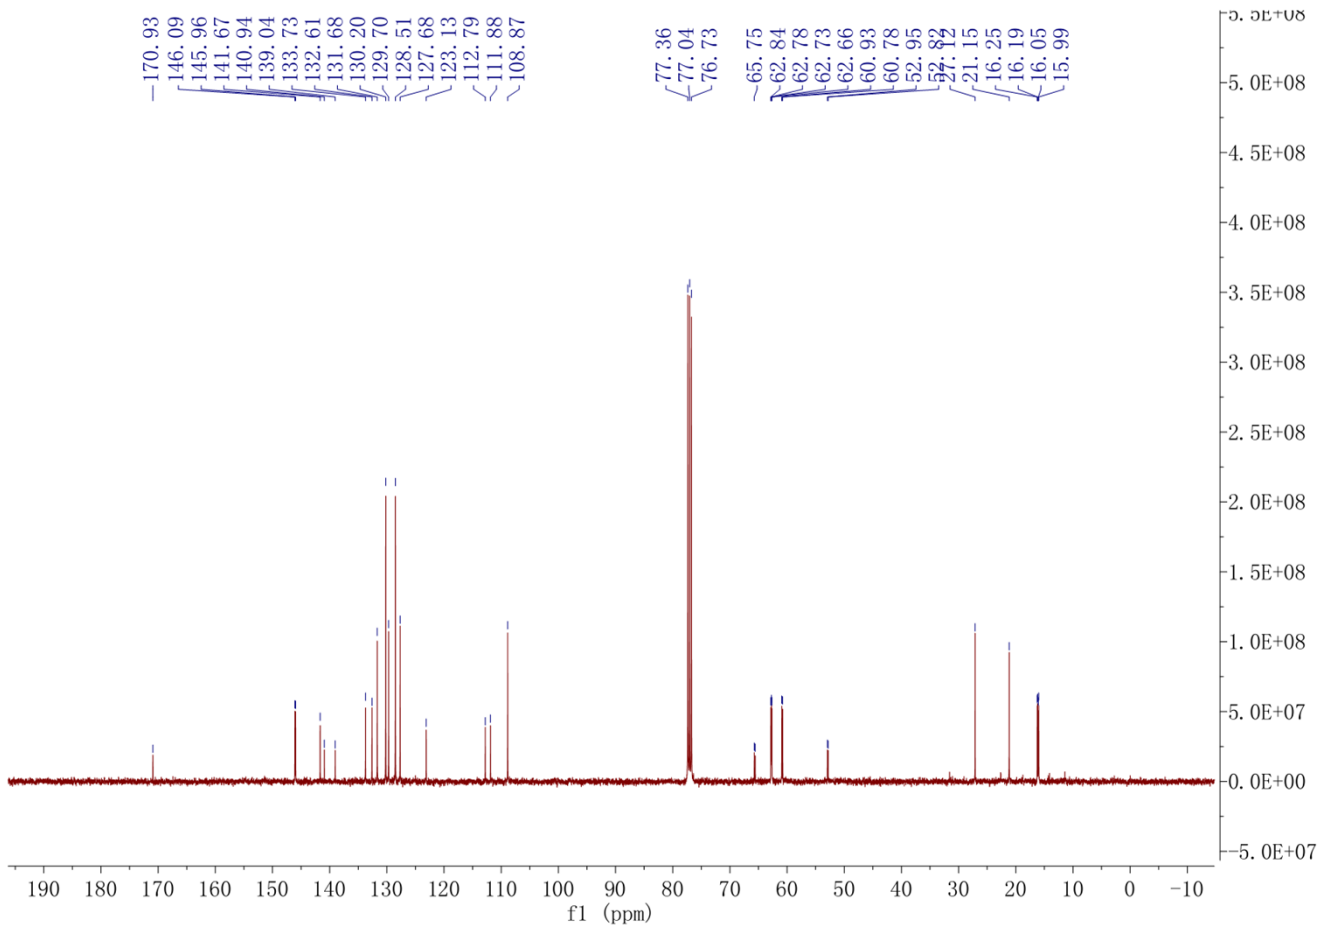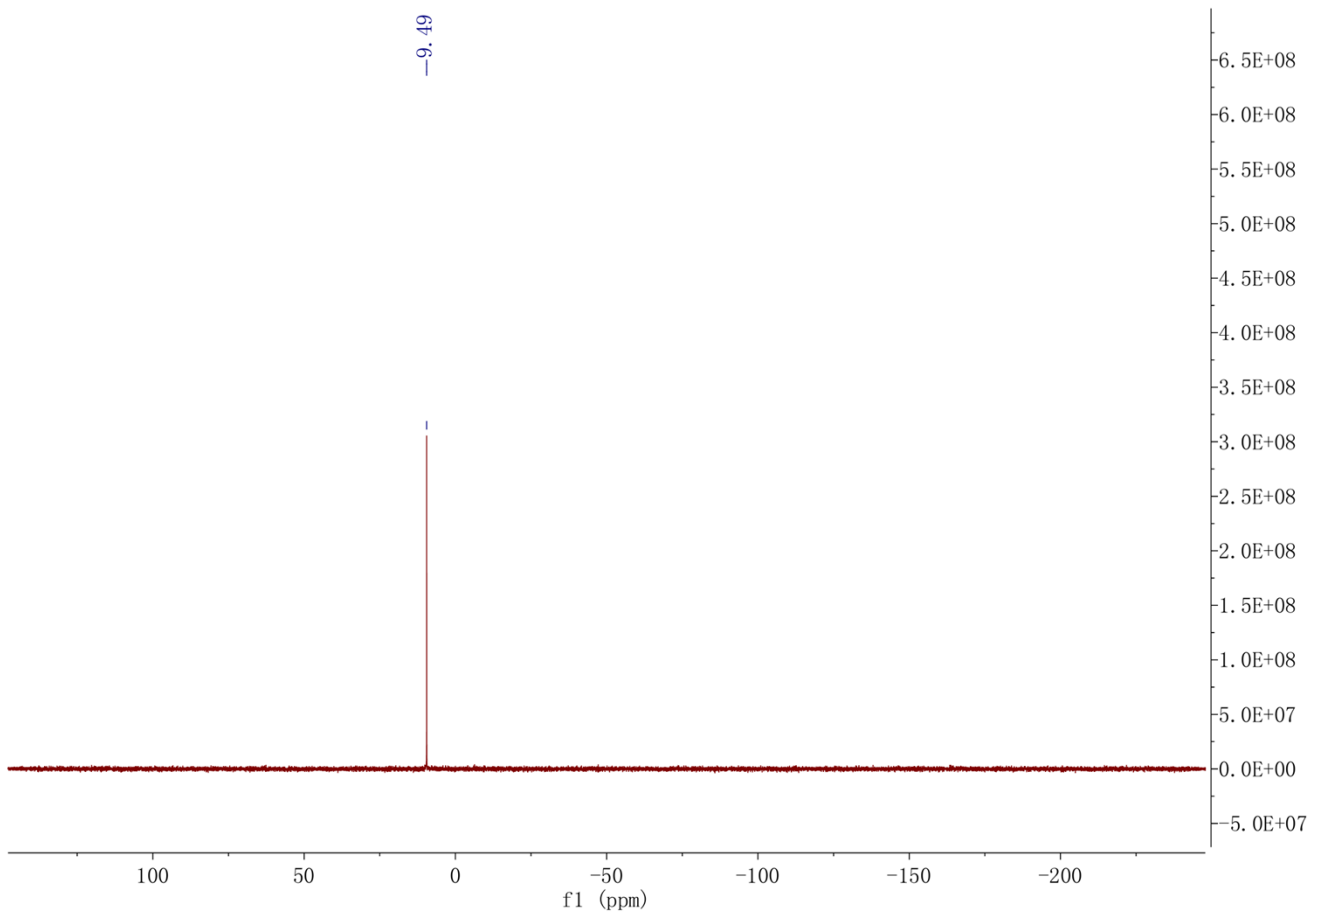

**Diethyl(5,5-dicyano-5'-methoxy-1'-methyl-2'-oxo-4-phenylspiro[cyclopent[2]ene-1,3'-indolin]-3-yl)phosphonate (3e):**

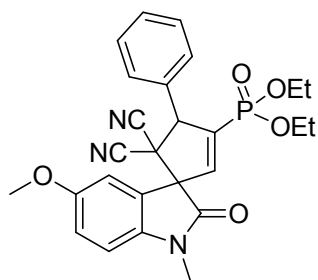

White solid; mp 205 °C.  $^1\text{H}$  NMR (400 MHz,  $\text{CDCl}_3$ ):  $\delta$  7.60 (d,  $J = 4.4$  Hz, 2H), 7.48 (d,  $J = 3.8$  Hz, 3H), 7.30 (s, 1H), 7.04 (d,  $J = 8.6$  Hz, 1H), 6.90 (d,  $J = 8.6$  Hz, 1H), 6.53-6.63 (m, 1H), 5.52 (s, 1H), 4.03-4.15 (m, 2H), 3.88-3.97 (m, 2H), 3.85 (s, 3H), 3.31 (s, 3H), 1.31 (t,  $J = 7.0$  Hz, 3H), 1.11 (t,  $J = 7.0$  Hz, 3H);  $^{13}\text{C}$  NMR (101 MHz,  $\text{CDCl}_3$ ):  $\delta$  170.71, 156.72, 145.79 (d,  $J = 12.7$  Hz), 140.18 (d,  $J = 190.9$  Hz), 137.24, 132.56, 130.18, 129.72, 128.53, 124.04, 116.86, 113.30, 112.70, 111.90, 109.74, 65.92 (d,  $J = 19.1$  Hz), 62.86 (d,  $J = 5.9$  Hz), 62.73 (d,  $J = 6.4$  Hz), 60.83 (d,  $J = 14.9$  Hz), 55.98, 52.95 (d,  $J = 13.0$  Hz), 27.17, 16.22 (d,  $J = 6.4$  Hz), 16.01 (d,  $J = 6.5$  Hz);  $^{31}\text{P}$  NMR (162 MHz,  $\text{CDCl}_3$ ):  $\delta$  9.47. HRMS calculated  $[\text{M}+\text{Na}]^+$  for  $\text{C}_{26}\text{H}_{26}\text{N}_3\text{O}_5\text{P}$ : 514.1508, found: 514.1503.

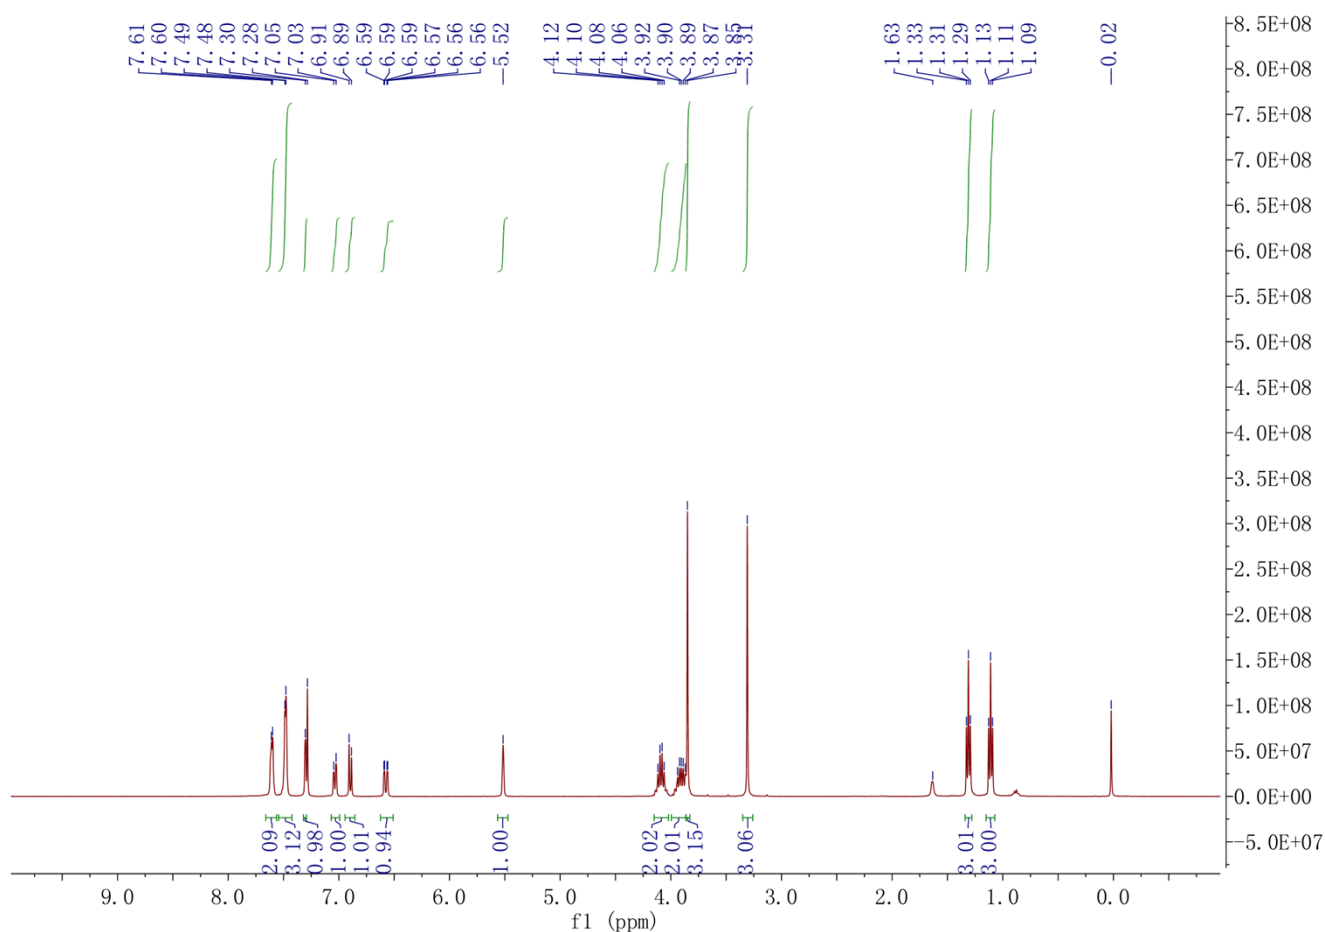

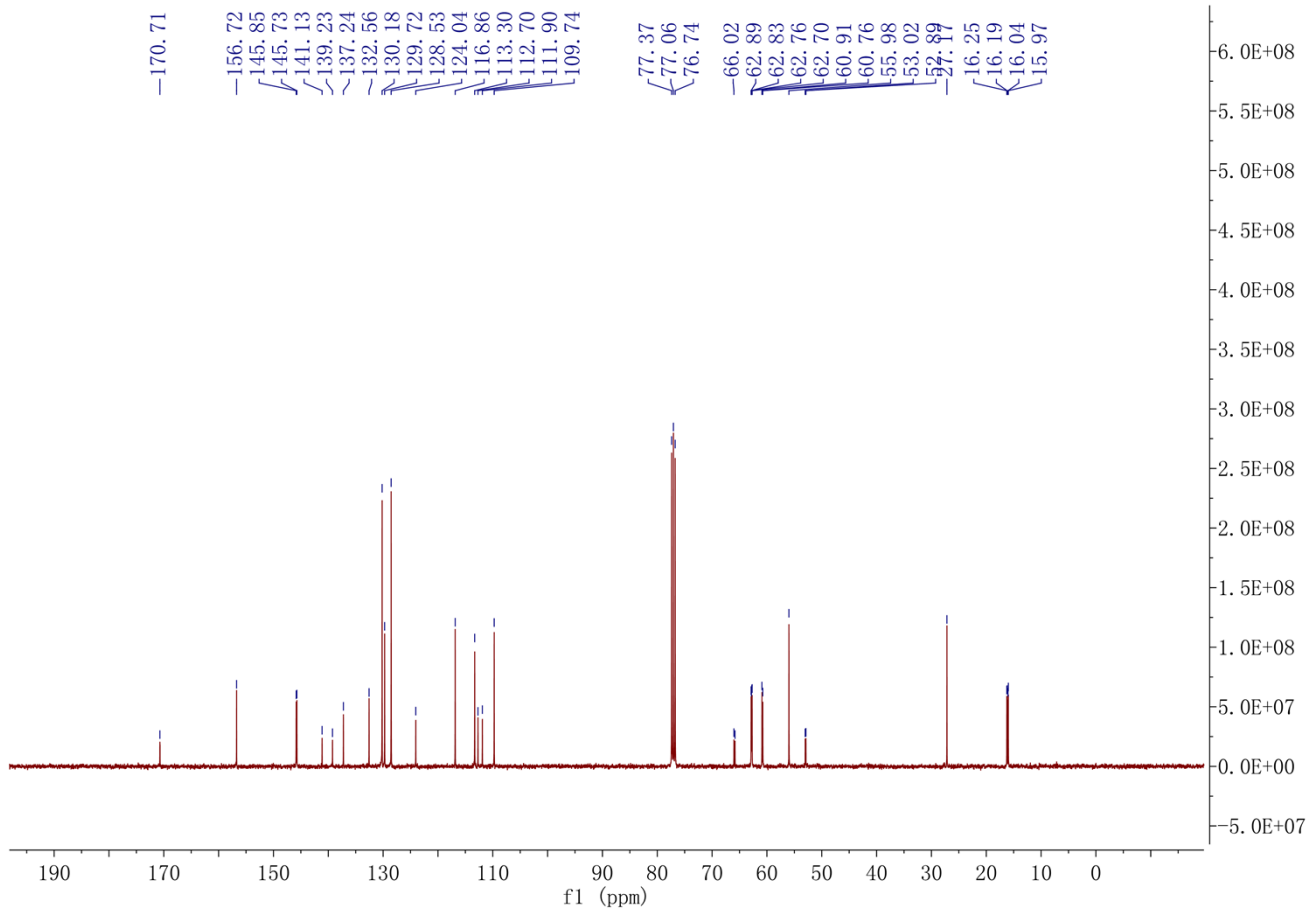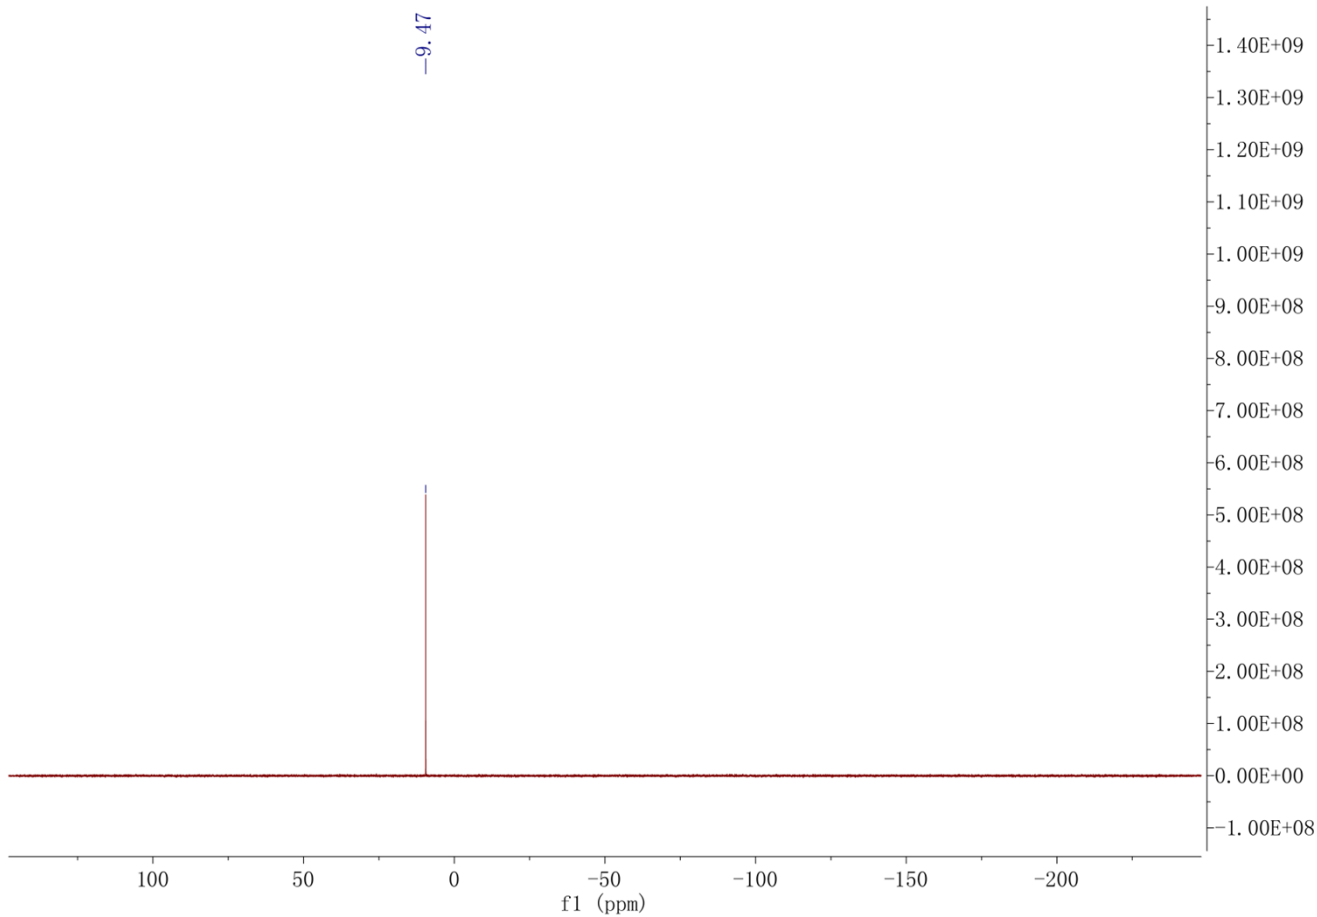

**Diethyl(5,5-dicyano-6'-methoxy-1'-methyl-2'-oxo-4-phenylspiro[cyclopent[2]ene-1,3'-indolin]-3-yl)phosphonate (3f):**

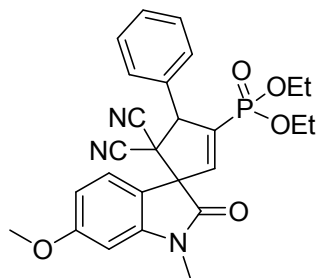

White solid; mp 155 °C.  $^1\text{H}$  NMR (400 MHz,  $\text{CDCl}_3$ ):  $\delta$  7.55-7.64 (m, 3H), 7.42-7.52 (m, 3H), 6.72 (dd,  $J = 8.4, 2.1$  Hz, 1H), 6.55 (dd,  $J = 11.0, 2.4$  Hz, 2H), 5.46 (s, 1H), 4.02-4.16 (m, 2H), 3.83-3.97 (m, 5H), 3.31 (s, 3H), 1.30 (t,  $J = 7.0$  Hz, 3H), 1.11 (t,  $J = 7.0$  Hz, 3H);  $^{13}\text{C}$  NMR (101 MHz,  $\text{CDCl}_3$ ):  $\delta$  171.55, 162.60, 146.32 (d,  $J = 12.4$  Hz), 145.51, 139.77 (d,  $J = 191.1$  Hz), 132.67, 130.15, 129.66, 128.52, 127.87, 114.74, 112.84, 112.02, 107.51, 97.31, 65.52 (d,  $J = 19.3$  Hz), 62.82 (d,  $J = 5.8$  Hz), 62.70 (d,  $J = 6.3$  Hz), 60.62 (d,  $J = 15.0$  Hz), 55.73, 53.08 (d,  $J = 12.7$  Hz), 27.11, 16.21 (d,  $J = 6.4$  Hz), 16.01 (d,  $J = 6.5$  Hz);  $^{31}\text{P}$  NMR (162 MHz,  $\text{CDCl}_3$ ):  $\delta$  9.56. HRMS calculated  $[\text{M}+\text{Na}]^+$  for  $\text{C}_{26}\text{H}_{26}\text{N}_3\text{O}_5\text{P}$ : 514.1508, found: 514.1508.

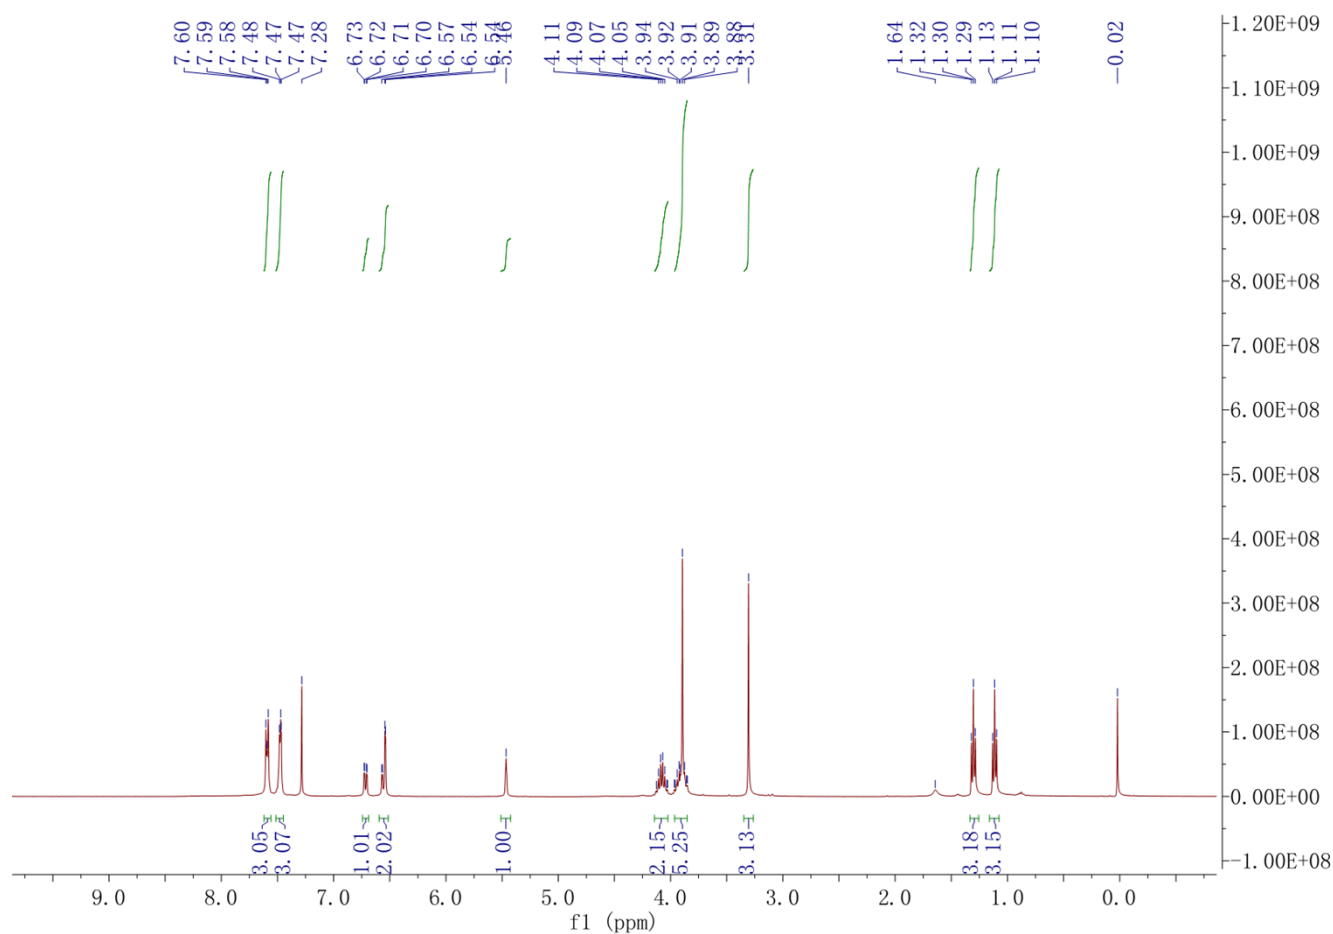

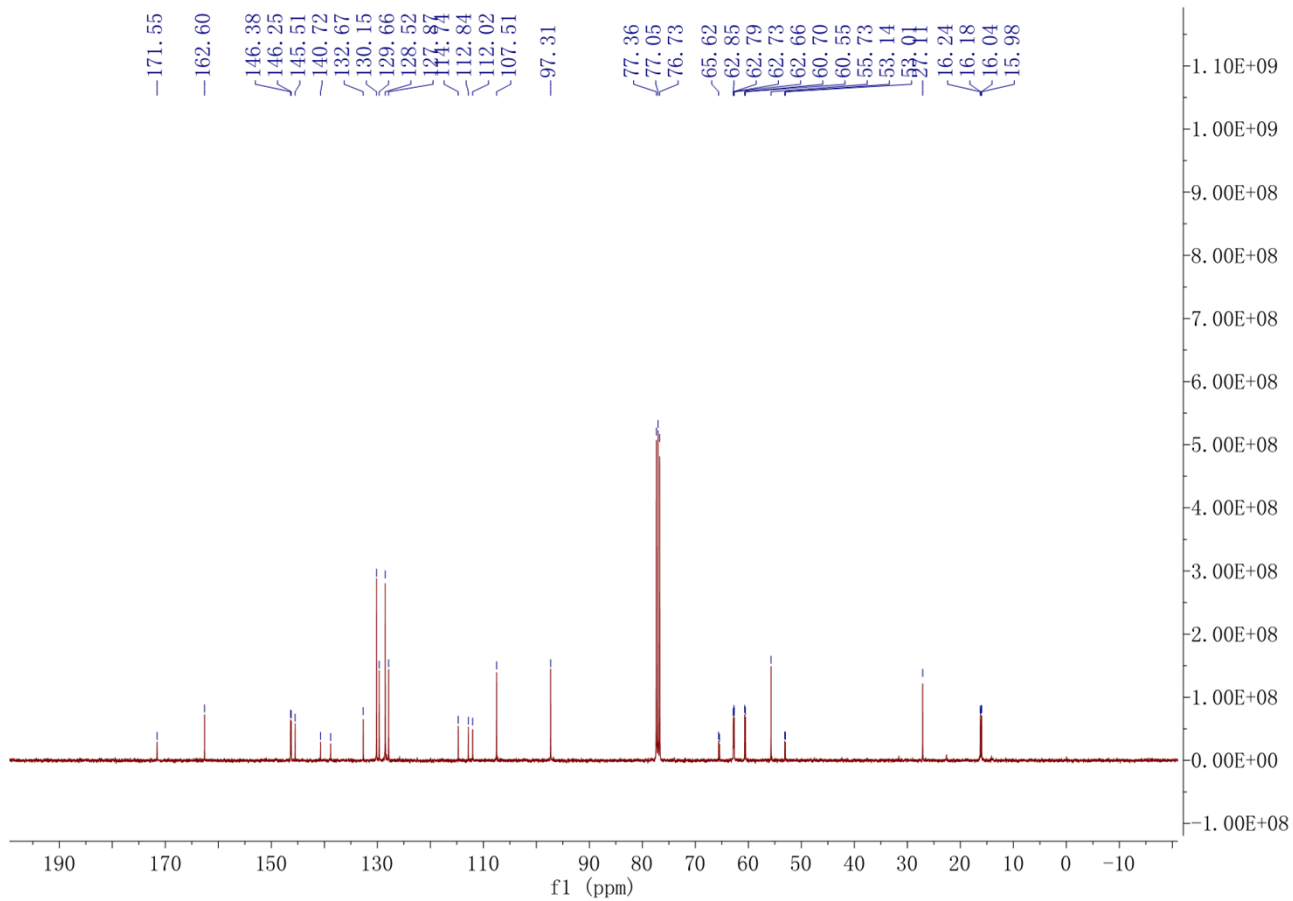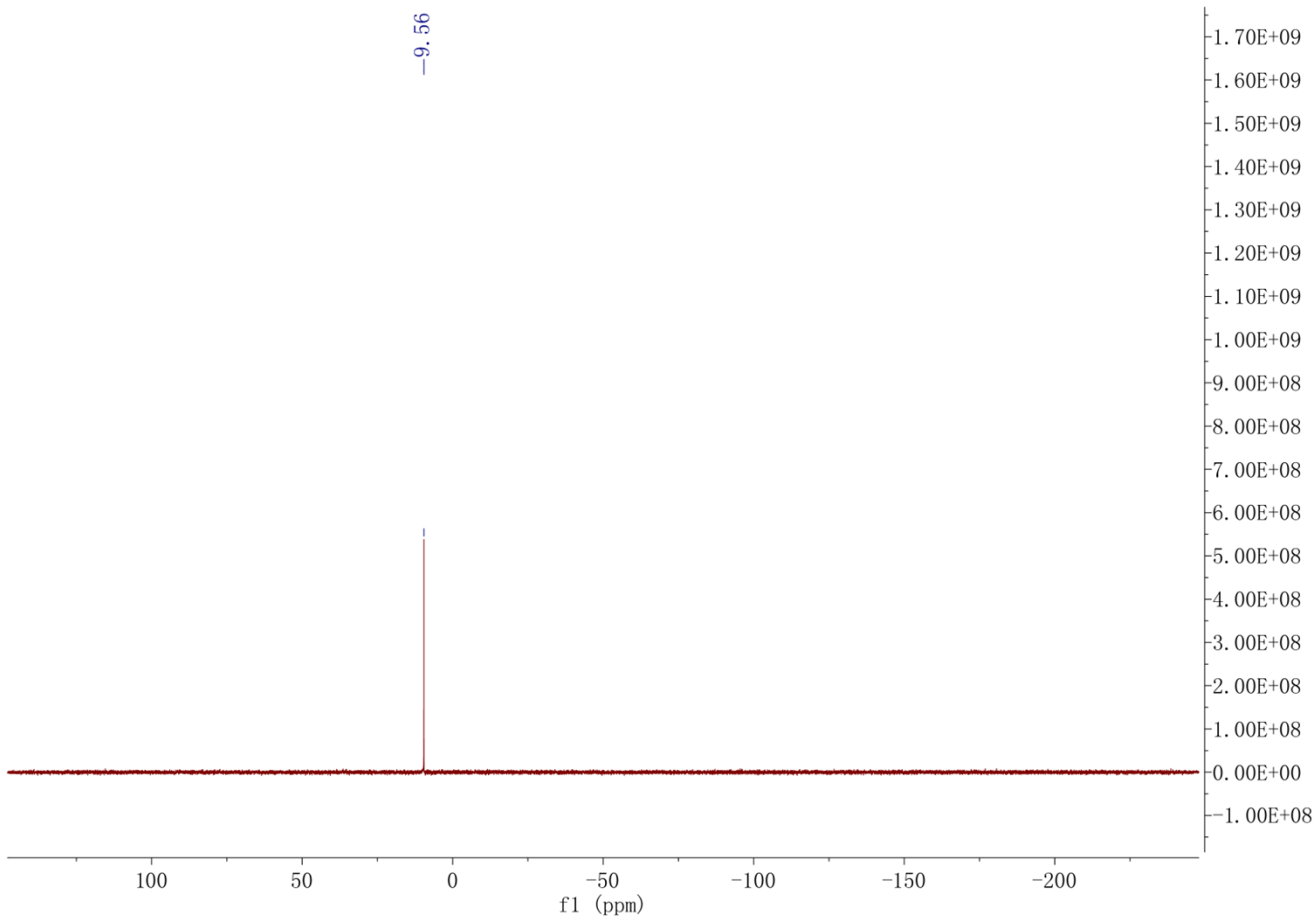

**Diethyl(5,5-dicyano-1',6'-dimethyl-2'-oxo-4-phenylspiro[cyclopent[2]ene-1,3'-indolin]-3-yl)phosphonate (3g):**

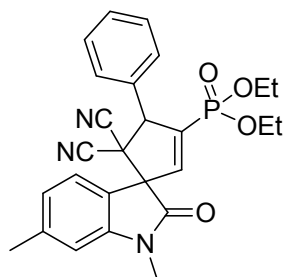

White solid; mp 181 °C.  $^1\text{H}$  NMR (400 MHz,  $\text{CDCl}_3$ ):  $\delta$  7.59 (d,  $J = 4.0$  Hz, 2H),

7.49 (dd,  $J = 10.7, 5.7$  Hz, 4H), 7.23 (d,  $J = 7.7$  Hz, 1H), 7.12 (t,  $J = 7.6$  Hz, 1H),

6.55 (d,  $J = 11.0$  Hz, 1H), 5.50 (s, 1H), 4.00-4.15 (m, 2H), 3.83-3.98 (m, 2H),

3.60 (s, 3H), 2.64 (s, 3H), 1.30 (t,  $J = 7.0$  Hz, 3H), 1.12 (t,  $J = 7.0$  Hz, 3H);  $^{13}\text{C}$

NMR (101 MHz,  $\text{CDCl}_3$ ):  $\delta$  171.77 (d,  $J = 2.4$  Hz), 146.05 (d,  $J = 12.6$  Hz), 141.79, 139.94 (d,  $J = 190.8$

Hz), 135.21, 132.58, 130.19, 129.70, 128.52, 124.84, 123.73, 123.69, 120.85, 112.88, 111.76, 65.17 (d,  $J$

$= 18.9$  Hz), 62.84 (d,  $J = 6.0$  Hz), 62.72 (d,  $J = 6.3$  Hz), 60.79 (d,  $J = 15.0$  Hz), 53.28 (d,  $J = 12.8$  Hz),

30.60, 19.06, 16.22 (d,  $J = 6.4$  Hz), 16.03 (d,  $J = 6.5$  Hz);  $^{31}\text{P}$  NMR (162 MHz,  $\text{CDCl}_3$ ):  $\delta$  9.49. HRMS

calculated  $[\text{M}+\text{Na}]^+$  for  $\text{C}_{26}\text{H}_{26}\text{N}_3\text{O}_4\text{P}$ : 498.1559, found: 498.1558.

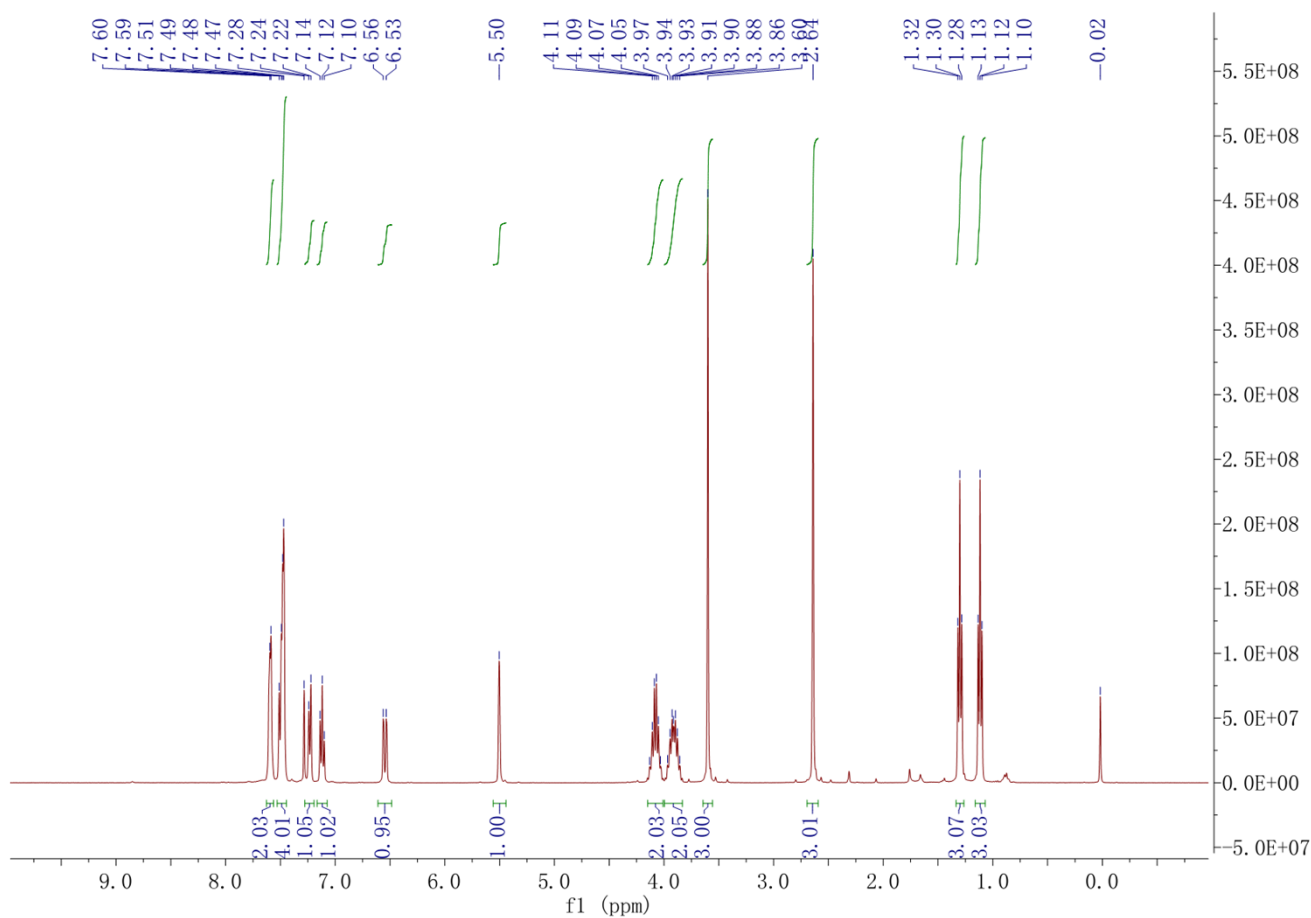

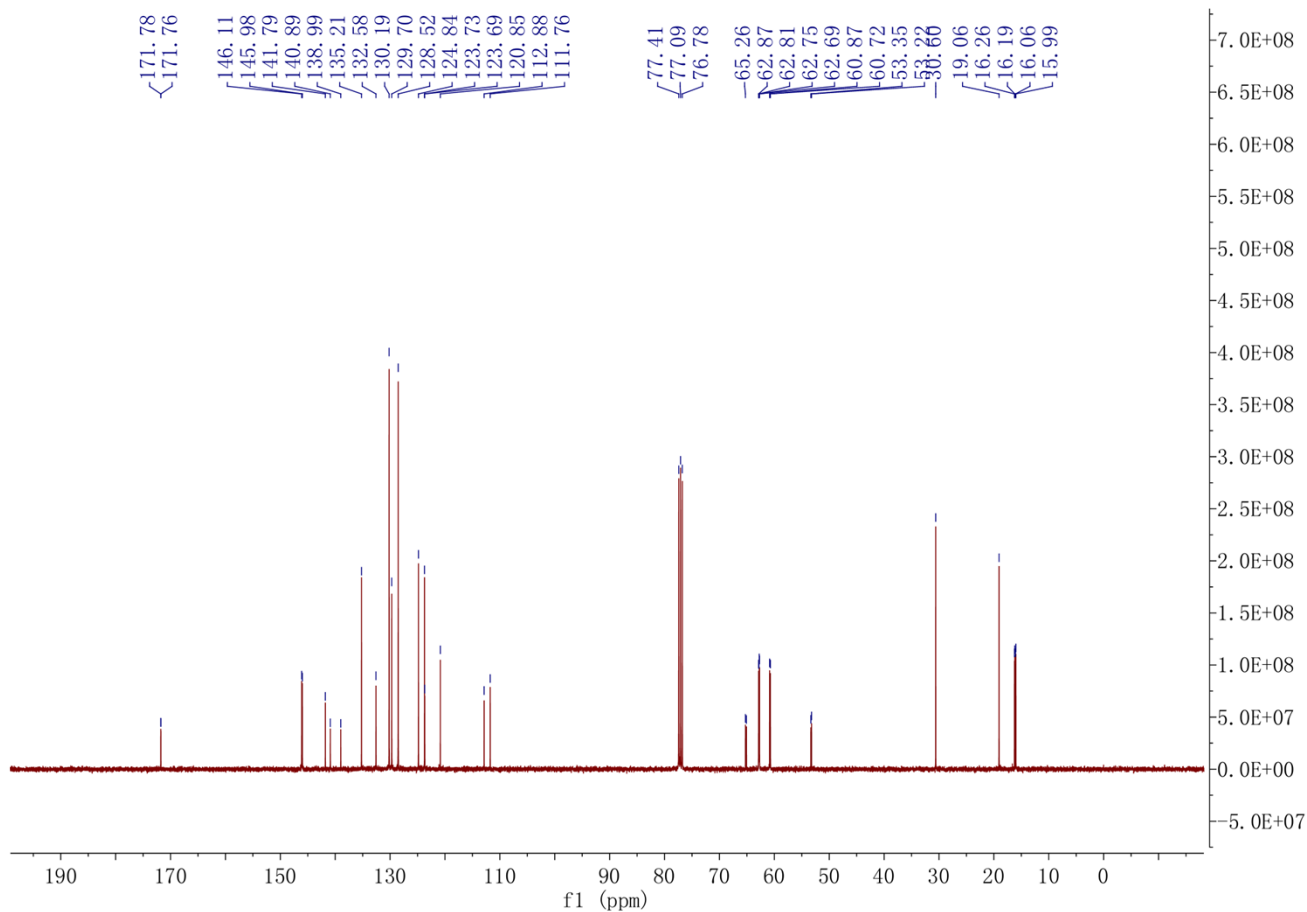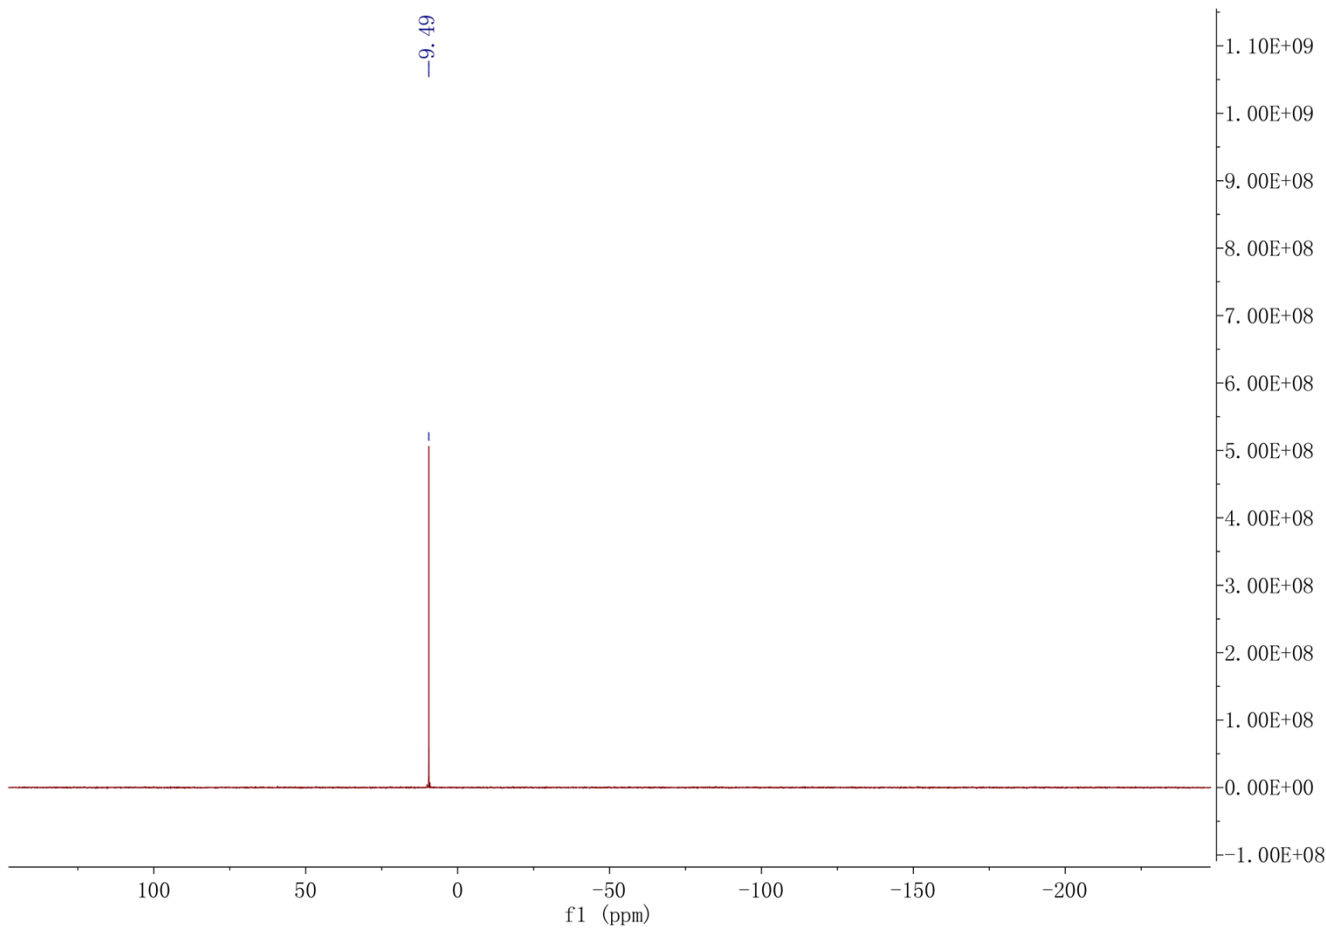

**Diethyl(5,5-dicyano-1',7'-dimethyl-2'-oxo-4-phenylspiro[cyclopent[2]ene-1,3'-indolin]-3-yl)phosphonate (3h):**

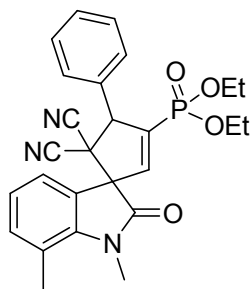

White solid; mp 183 °C.  $^1\text{H}$  NMR (400 MHz,  $\text{CDCl}_3$ ):  $\delta$  7.56 (d,  $J = 19.9$  Hz, 2H), 7.49 (d,  $J = 16.5$  Hz, 4H), 7.23 (d,  $J = 7.6$  Hz, 1H), 7.12 (t,  $J = 7.6$  Hz, 1H), 6.55 (d,  $J = 11.0$  Hz, 1H), 5.50 (s, 1H), 4.02-4.17 (m, 2H), 3.82-3.99 (m, 2H), 3.60 (s, 3H), 2.64 (s, 3H), 1.30 (t,  $J = 7.0$  Hz, 3H), 1.12 (t,  $J = 7.0$  Hz, 3H);  $^{13}\text{C}$  NMR (101 MHz,  $\text{CDCl}_3$ ):  $\delta$  171.77, 146.01 (d,  $J = 12.5$  Hz), 141.80, 140.00 (d,  $J = 190.7$  Hz), 135.21, 132.60, 130.19, 129.69, 128.51, 124.84, 123.72, 120.83, 112.88, 111.76, 65.18 (d,  $J = 18.8$  Hz), 62.81 (d,  $J = 6.1$  Hz), 62.70 (d,  $J = 6.2$  Hz), 60.81 (d,  $J = 15.0$  Hz), 53.30 (d,  $J = 12.8$  Hz), 30.60, 19.05, 16.22 (d,  $J = 6.3$  Hz), 16.02 (d,  $J = 6.4$  Hz);  $^{31}\text{P}$  NMR (162 MHz,  $\text{CDCl}_3$ ):  $\delta$  9.49. HRMS calculated  $[\text{M}+\text{Na}]^+$  for  $\text{C}_{26}\text{H}_{26}\text{N}_3\text{O}_4\text{P}$ : 498.1559, found: 498.1555.

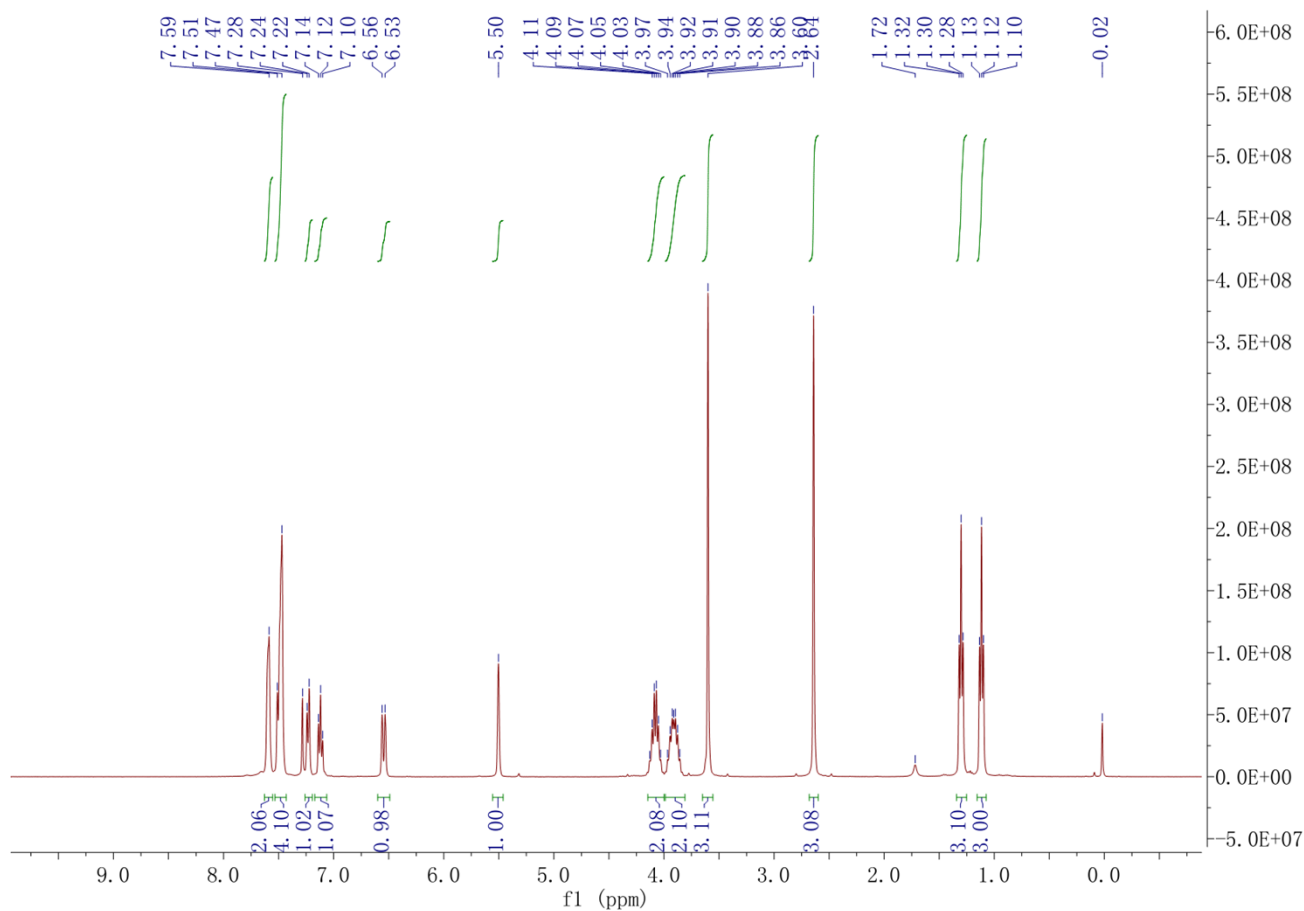



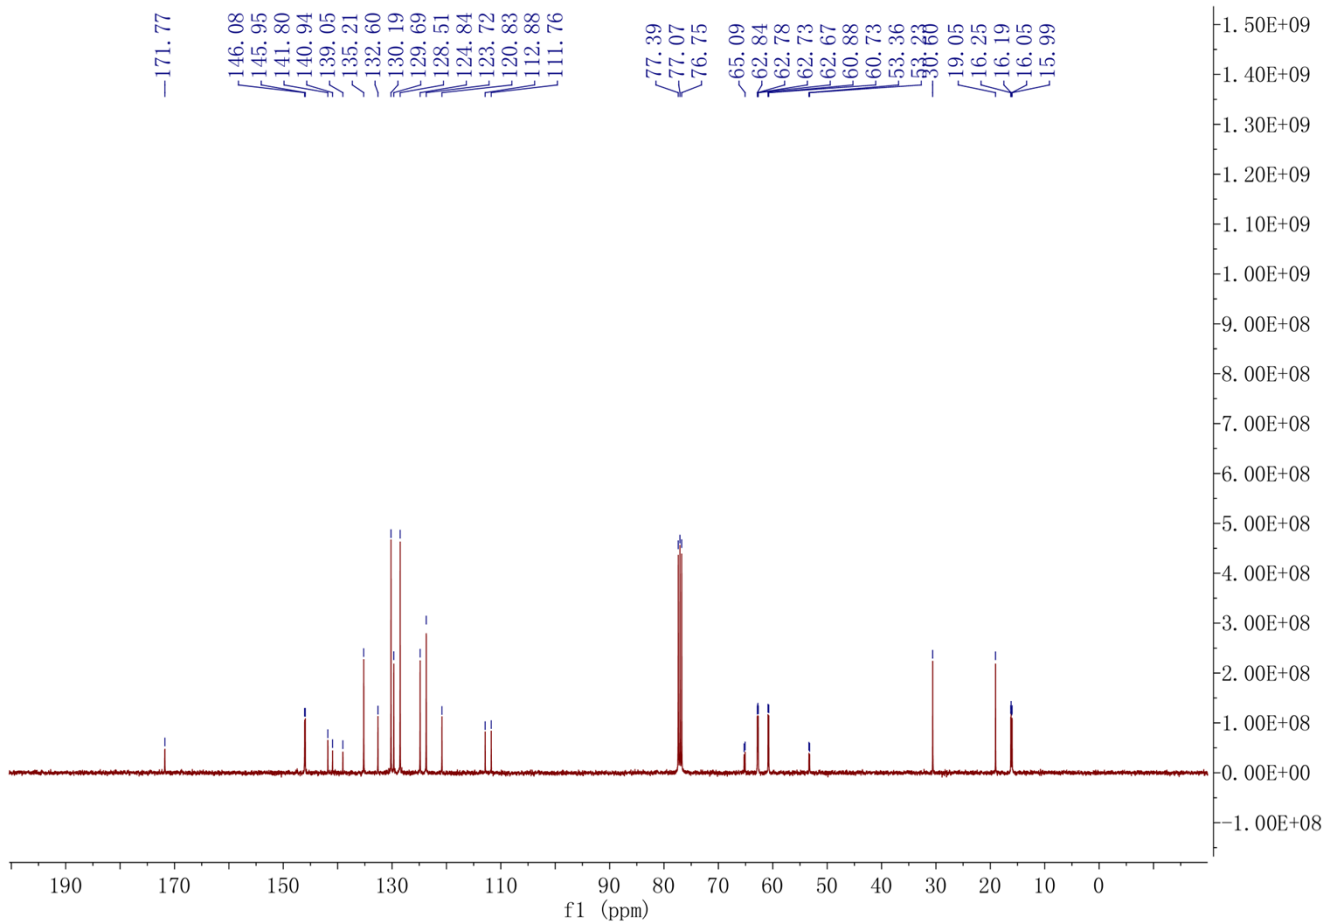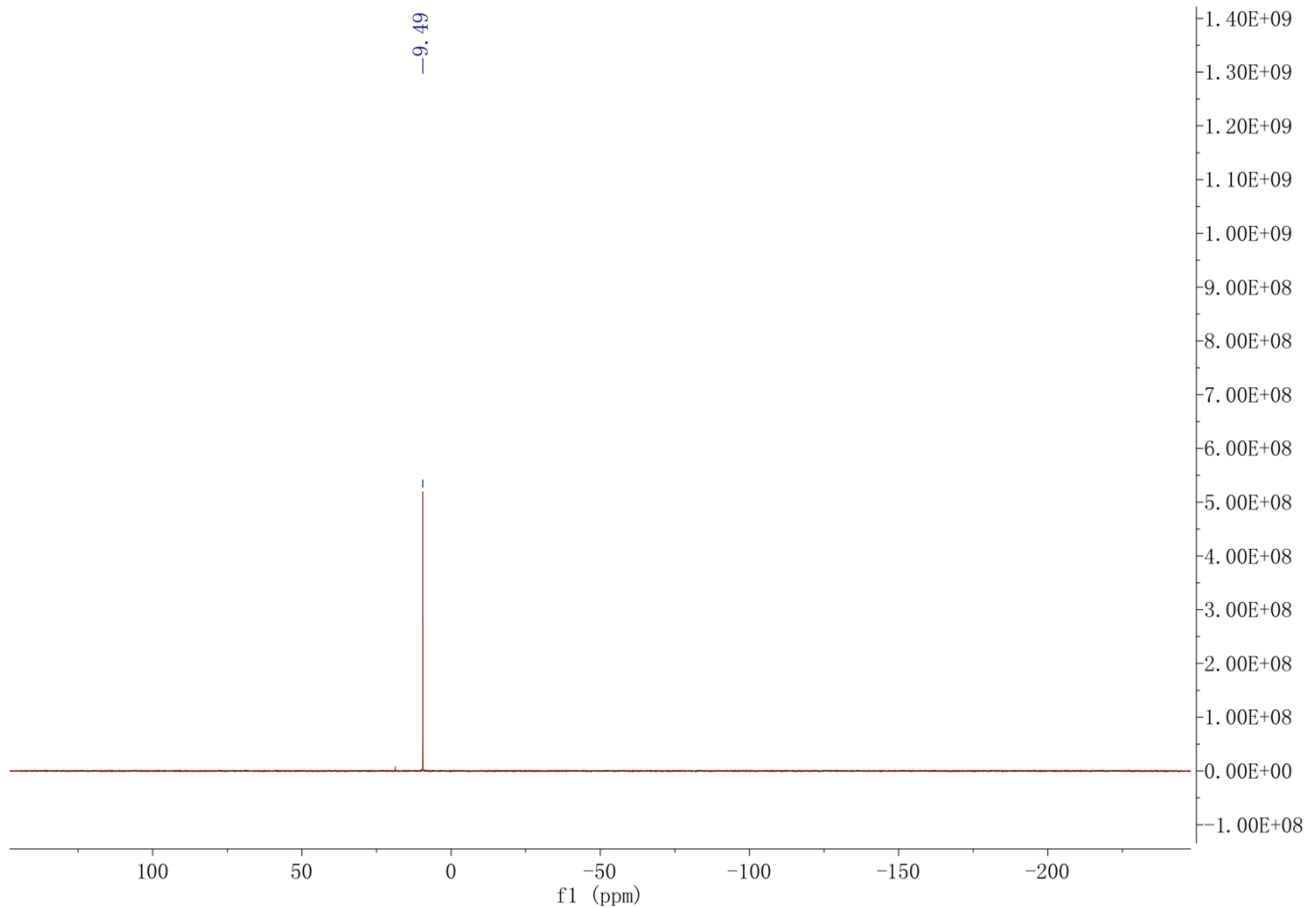

**Diethyl(5,5-dicyano-1',5',7'-trimethyl-2'-oxo-4-phenylspiro[cyclopent[2]ene-1,3'-indolin]-3-yl)phosphonate (3i):**

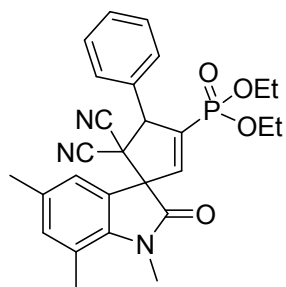

White solid; mp 183 °C.  $^1\text{H}$  NMR (400 MHz,  $\text{CDCl}_3$ ):  $\delta$  7.59 (d,  $J = 3.8$  Hz, 2H), 7.47 (d,  $J = 3.3$  Hz, 3H), 7.31 (s, 1H), 7.03 (s, 1H), 6.40-6.62 (m, 1H), 5.50 (s, 1H), 4.01-4.17 (m, 2H), 3.81-4.00 (m, 2H), 3.57 (s, 3H), 2.59 (s, 3H), 2.35 (s, 3H), 1.30 (t,  $J = 7.0$  Hz, 3H), 1.11 (t,  $J = 7.0$  Hz, 3H);  $^{13}\text{C}$  NMR (101 MHz,  $\text{CDCl}_3$ ):  $\delta$  171.71, 146.23 (d,  $J = 12.6$  Hz), 139.77 (d,  $J = 190.7$  Hz), 139.32, 135.61, 133.40, 132.68, 130.20, 129.66, 128.48, 125.52, 123.80, 120.46, 112.94, 111.79, 65.26 (d,  $J = 19.2$  Hz), 62.79 (d,  $J = 5.9$  Hz), 62.67 (d,  $J = 6.3$  Hz), 60.84 (d,  $J = 15.0$  Hz), 53.31 (d,  $J = 13.0$  Hz), 30.52, 20.79, 18.86, 16.22 (d,  $J = 6.4$  Hz), 16.02 (d,  $J = 6.5$  Hz);  $^{31}\text{P}$  NMR (162 MHz,  $\text{CDCl}_3$ ):  $\delta$  9.57. HRMS calculated  $[\text{M}+\text{Na}]^+$  for  $\text{C}_{27}\text{H}_{28}\text{N}_3\text{O}_4\text{P}$ : 512.1715, found: 512.1707.

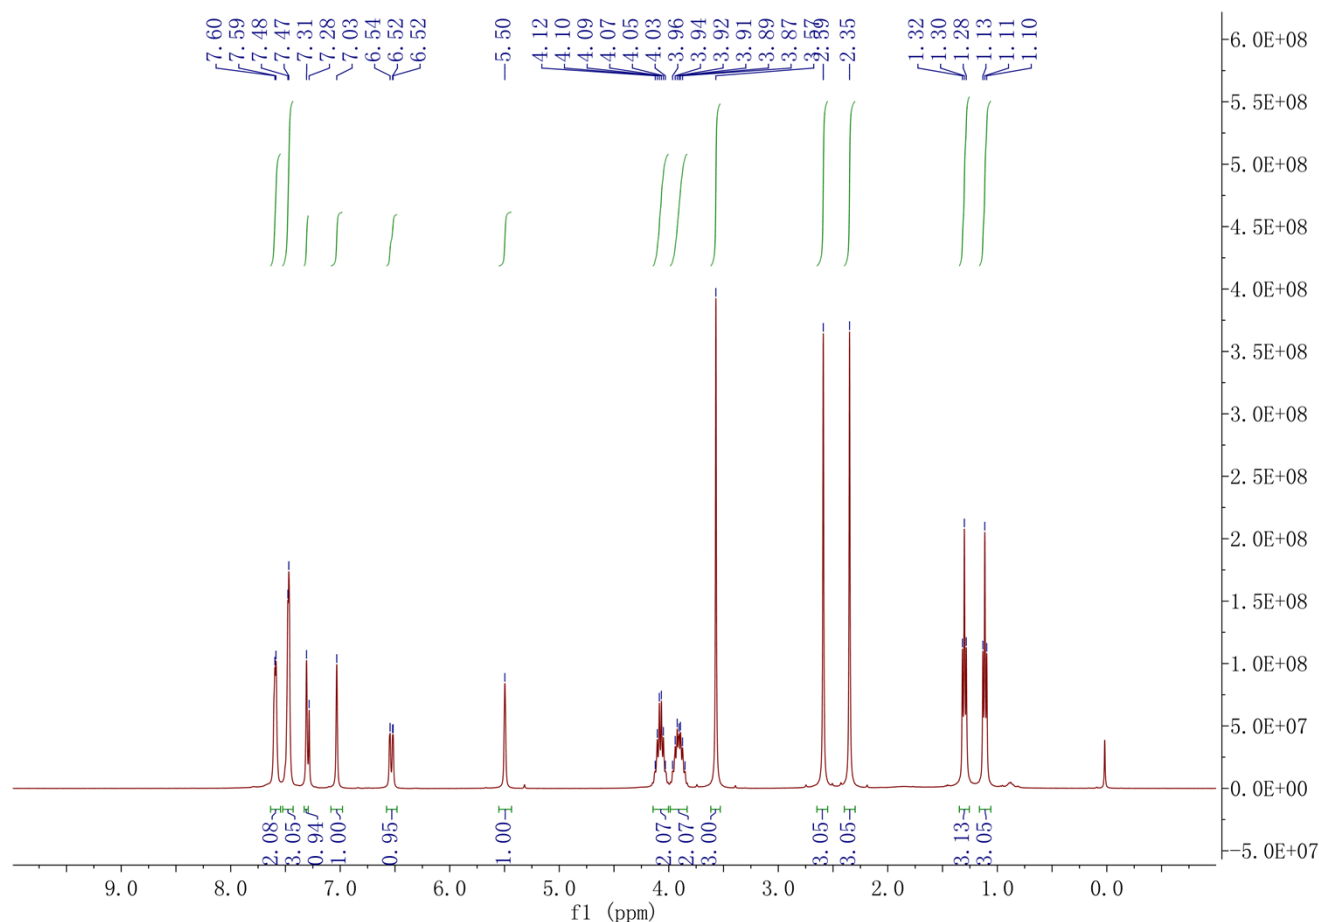

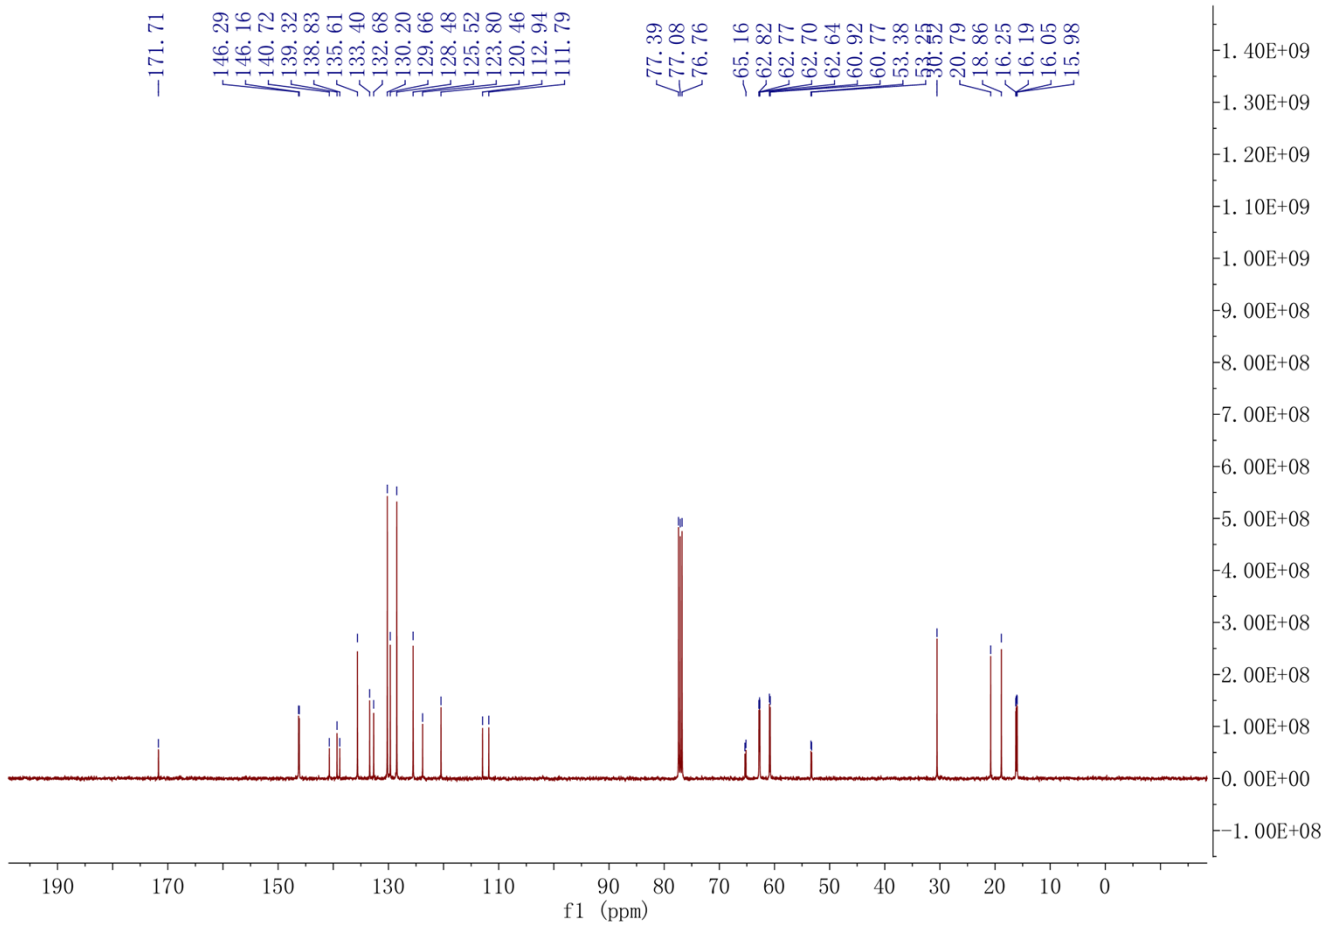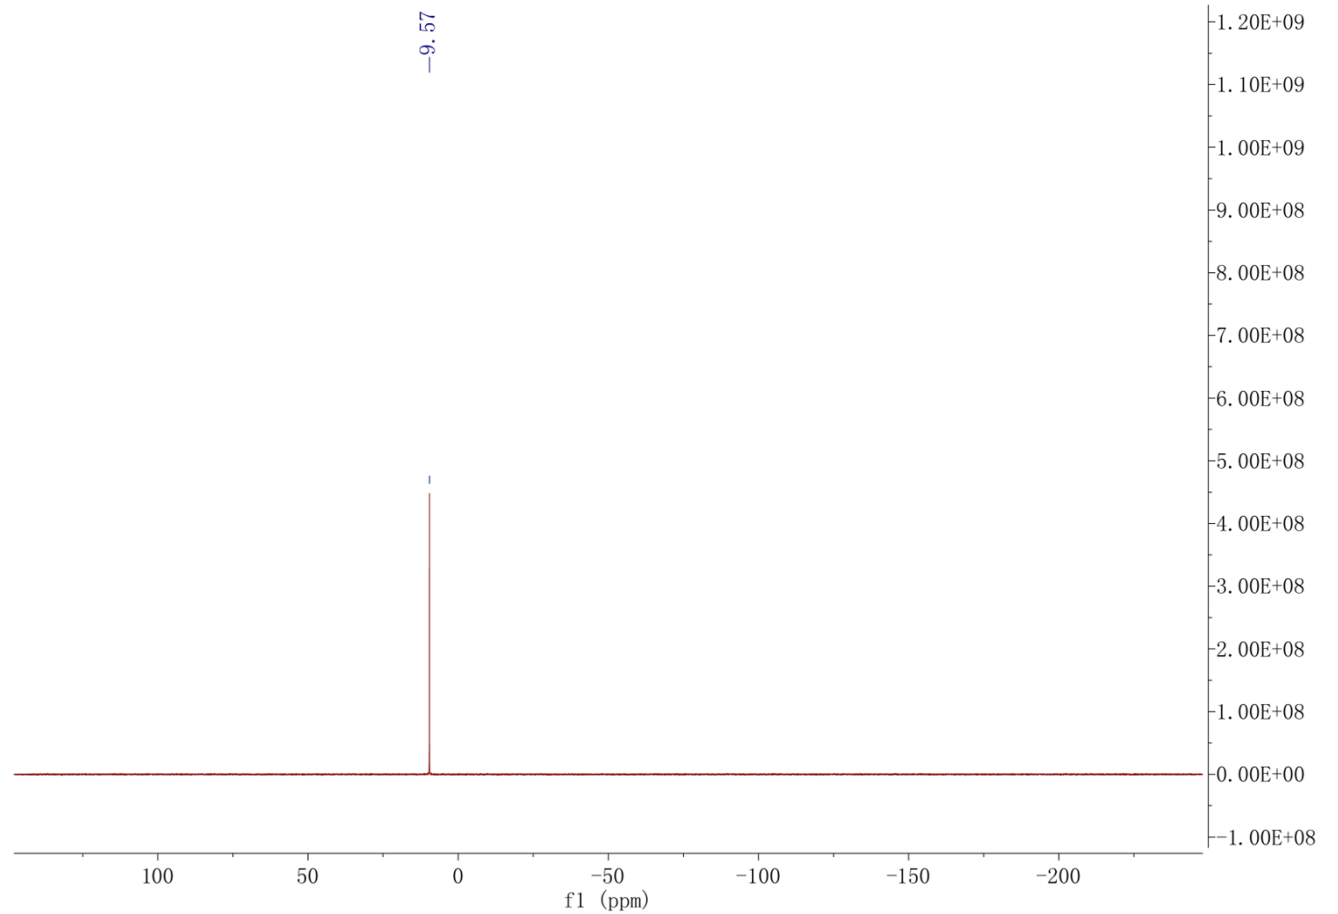

## Diethyl(5,5-dicyano-1'-methyl-2'-oxo-4-propylspiro[cyclopent[2]ene-1,3'-indolin]-3-yl)phosphonate

(3j):

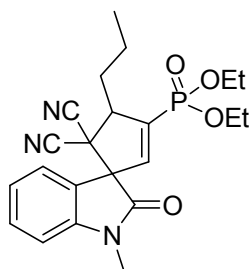

White solid; mp 150 °C.  $^1\text{H}$  NMR (400 MHz,  $\text{CDCl}_3$ ):  $\delta$  7.64 (d,  $J = 7.6$  Hz, 1H), 7.51 (t,  $J = 7.8$  Hz, 1H), 7.24 (t,  $J = 7.6$  Hz, 1H), 6.98 (d,  $J = 7.8$  Hz, 1H), 6.41 (d,  $J = 11.1$  Hz, 1H), 4.30 (d,  $J = 10.1$  Hz, 1H), 4.20 (dd,  $J = 7.0, 4.1$  Hz, 4H), 3.29 (s, 3H), 2.29 (ddd,  $J = 20.2, 10.6, 5.1$  Hz, 1H), 1.87-2.03 (m, 1H), 1.69-1.80 (m, 1H),

1.57-1.69 (m, 1H), 1.41 (t,  $J = 7.0$  Hz, 6H), 1.09 (t,  $J = 7.2$  Hz, 3H);  $^{13}\text{C}$  NMR (101 MHz,  $\text{CDCl}_3$ ):  $\delta$  170.88, 144.44, 144.26 (d,  $J = 11.1$  Hz), 141.08 (d,  $J = 186.4$  Hz), 131.41, 126.56, 123.81, 123.16, 113.41, 111.71, 109.16, 65.47 (d,  $J = 19.2$  Hz), 62.83 (d,  $J = 4.3$  Hz), 62.78 (d,  $J = 4.8$  Hz), 53.99 (d,  $J = 15.2$  Hz), 49.52 (d,  $J = 13.3$  Hz), 32.93, 27.03, 20.52, 16.38 (d,  $J = 6.2$  Hz), 13.90;  $^{31}\text{P}$  NMR (162 MHz,  $\text{CDCl}_3$ ):  $\delta$  10.66. HRMS calculated  $[\text{M}+\text{Na}]^+$  for  $\text{C}_{22}\text{H}_{26}\text{N}_3\text{O}_4\text{P}$ : 450.1559, found: 450.1554.

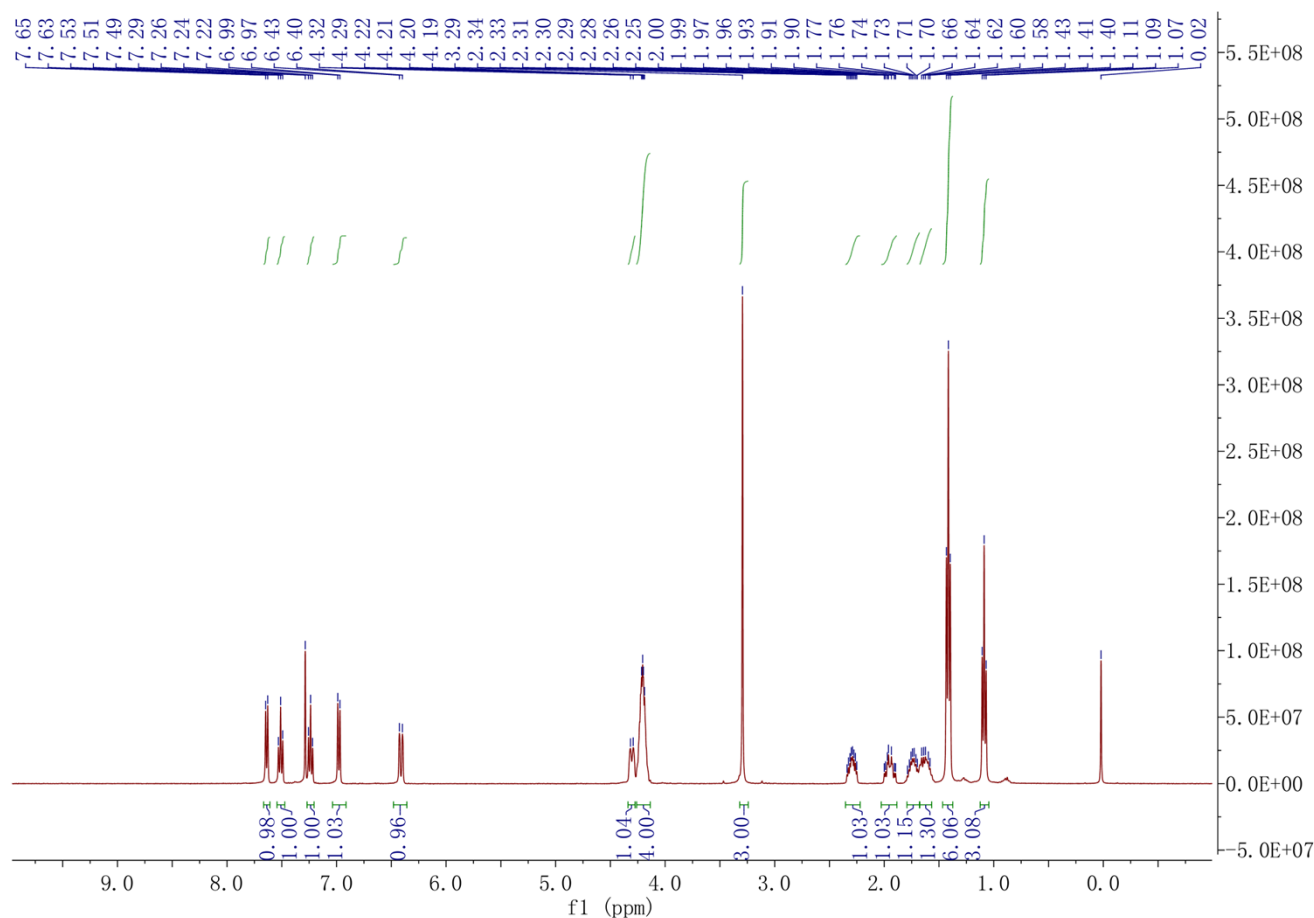

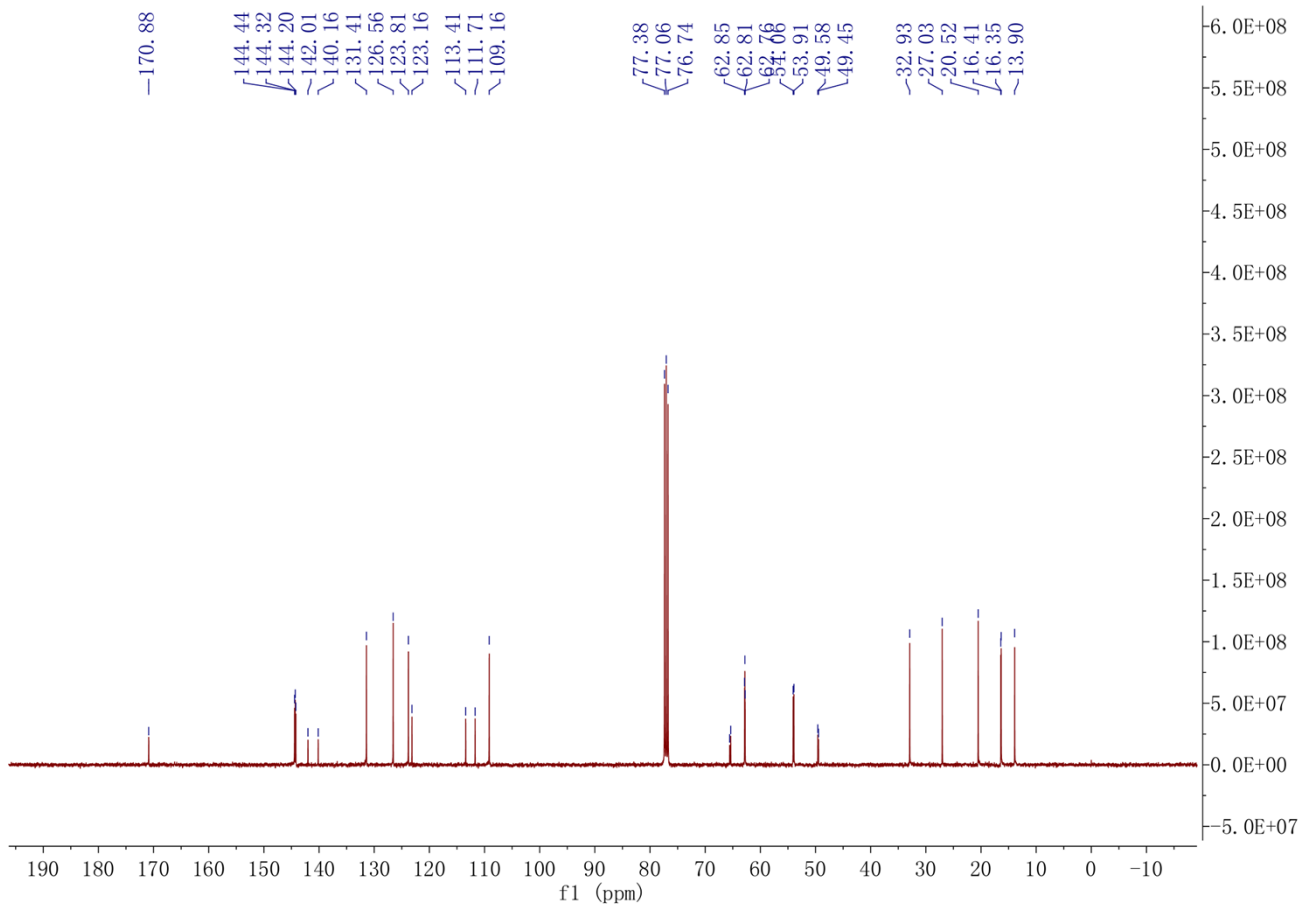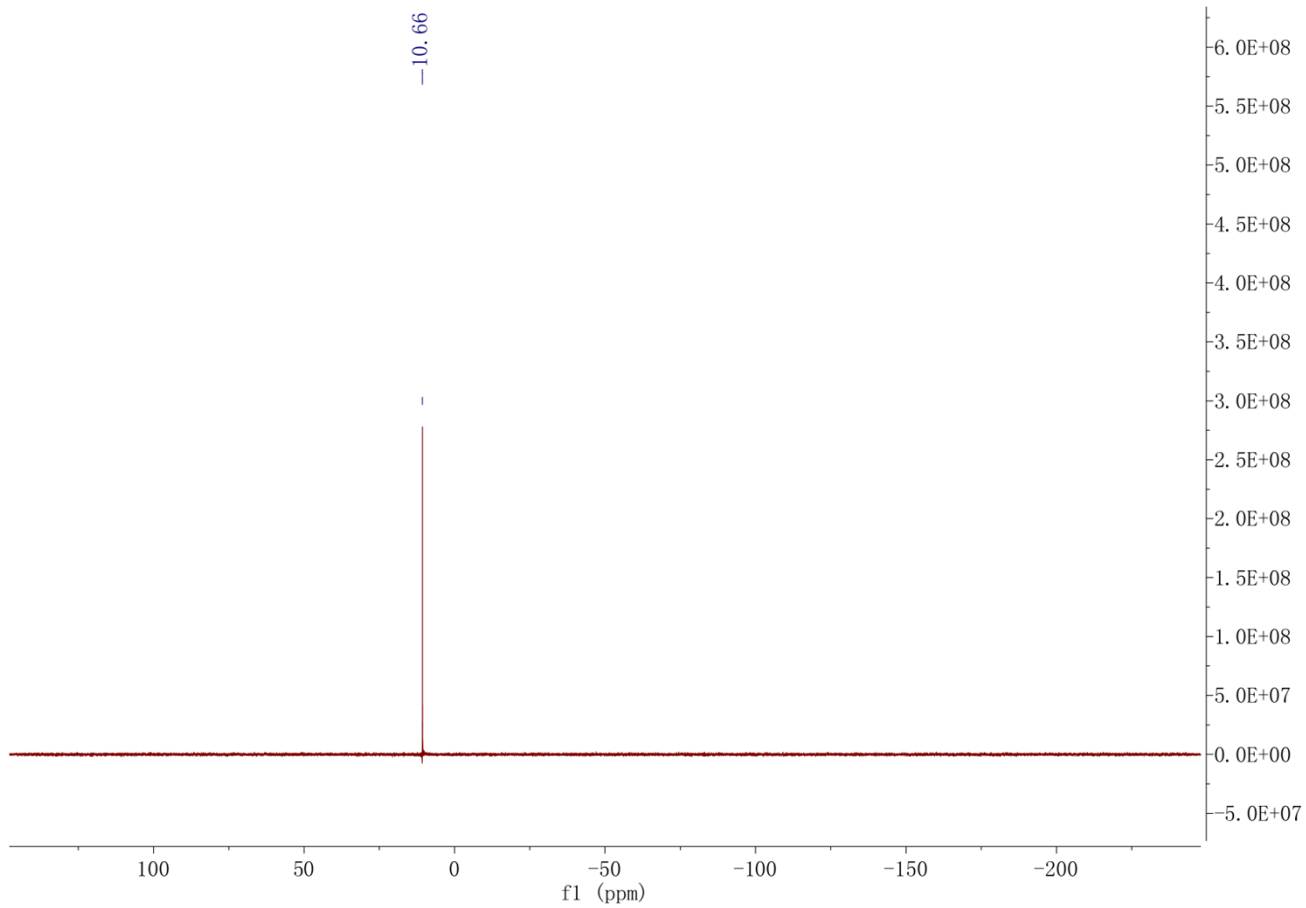

**Diethyl(5,5-dicyano-1',5'-dimethyl-2'-oxo-4-propylspiro[cyclopent[2]ene-1,3'-indolin]-3-yl)phosphonate (3k):**

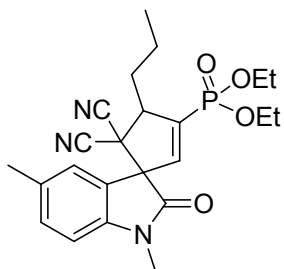

White solid; mp 153 °C.  $^1\text{H}$  NMR (400 MHz,  $\text{CDCl}_3$ ):  $\delta$  7.44 (s, 1H), 7.29 (s, 1H), 6.86 (d,  $J = 8.0$  Hz, 1H), 6.40 (d,  $J = 11.1$  Hz, 1H), 4.30 (d,  $J = 9.6$  Hz, 1H), 4.21 (dd,  $J = 12.5, 6.8$  Hz, 4H), 3.27 (s, 3H), 2.42 (s, 3H), 2.29 (ddd,  $J = 15.4, 10.9, 5.3$  Hz, 1H), 1.88-2.01 (m, 1H), 1.68-1.79 (m, 1H), 1.56-1.66 (m, 1H), 1.41 (t,  $J = 7.0$  Hz, 6H), 1.09 (t,  $J = 7.2$  Hz, 3H);  $^{13}\text{C}$  NMR (101 MHz,  $\text{CDCl}_3$ ):  $\delta$  170.78, 144.64 (d,  $J = 12.7$  Hz), 141.79, 139.96, 133.59, 131.63, 127.27, 123.17, 113.45, 111.72, 108.86, 65.49 (d,  $J = 19.2$  Hz), 62.77 (t,  $J = 4.8$  Hz), 53.95 (d,  $J = 15.5$  Hz), 49.57 (d,  $J = 13.0$  Hz), 32.91, 27.02, 21.16, 20.51, 16.37 (d,  $J = 6.3$  Hz), 13.89;  $^{31}\text{P}$  NMR (162 MHz,  $\text{CDCl}_3$ ):  $\delta$  10.76. HRMS calculated  $[\text{M}+\text{Na}]^+$  for  $\text{C}_{23}\text{H}_{28}\text{N}_3\text{O}_4\text{P}$ : 464.1715, found: 464.1710.

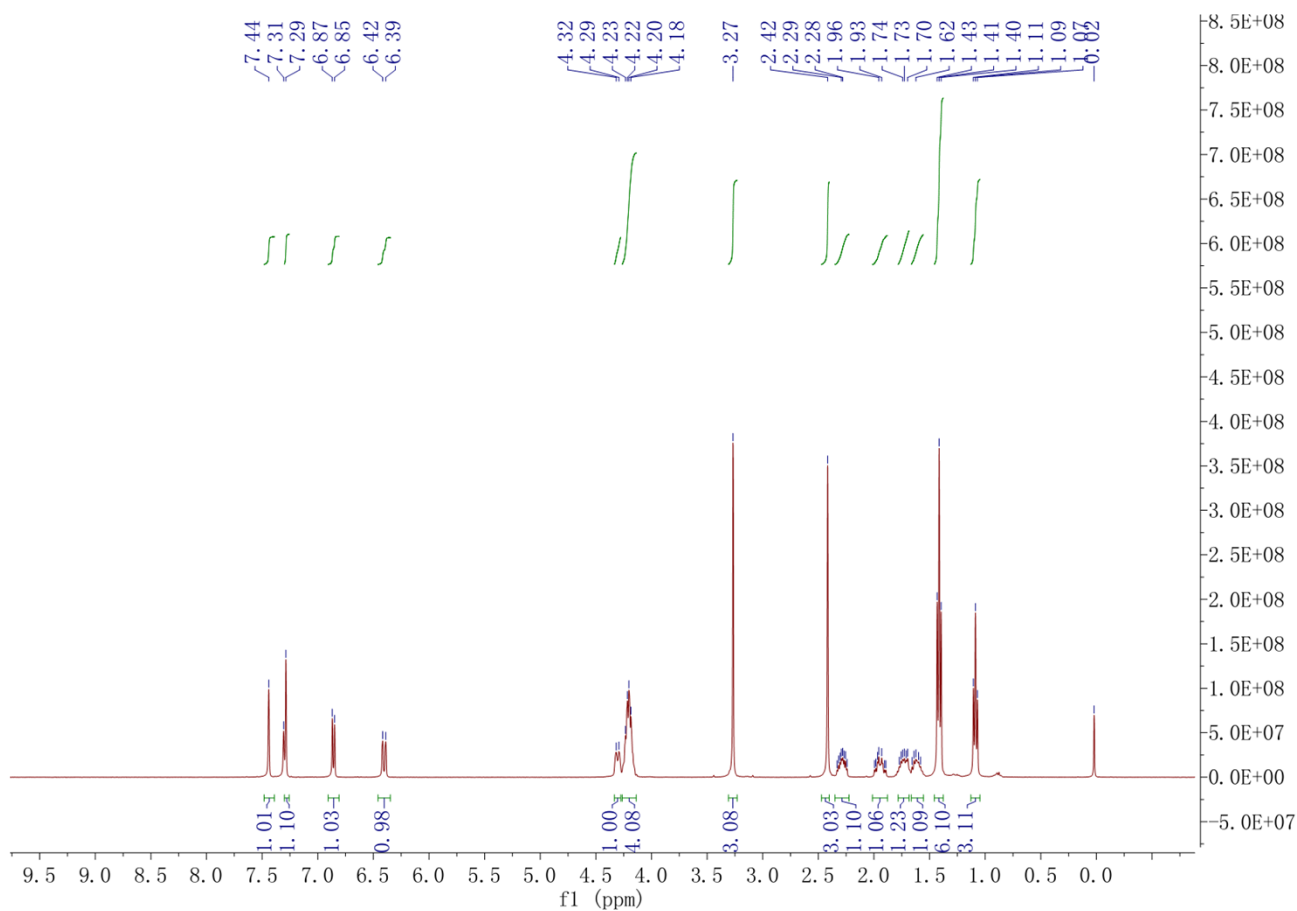

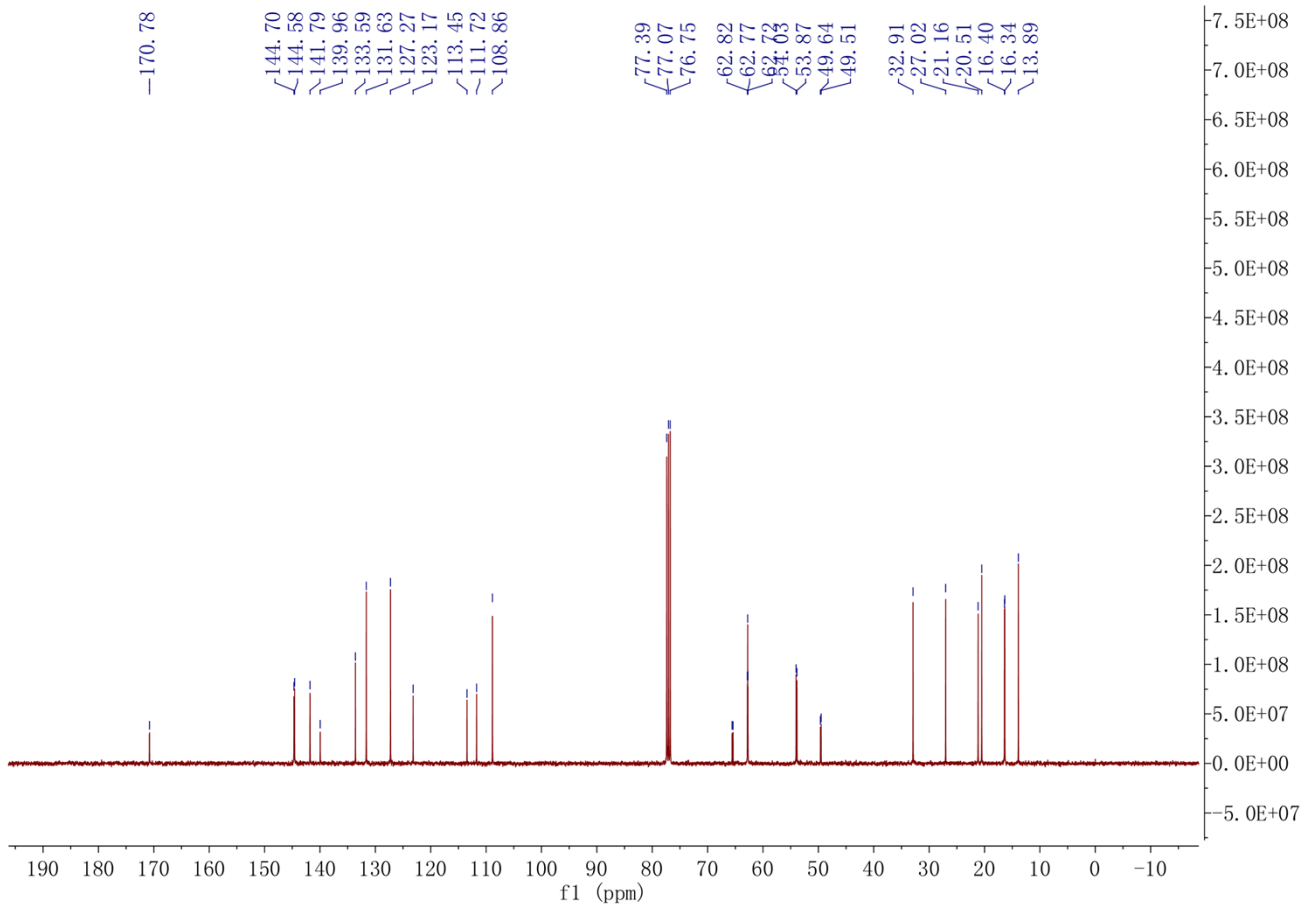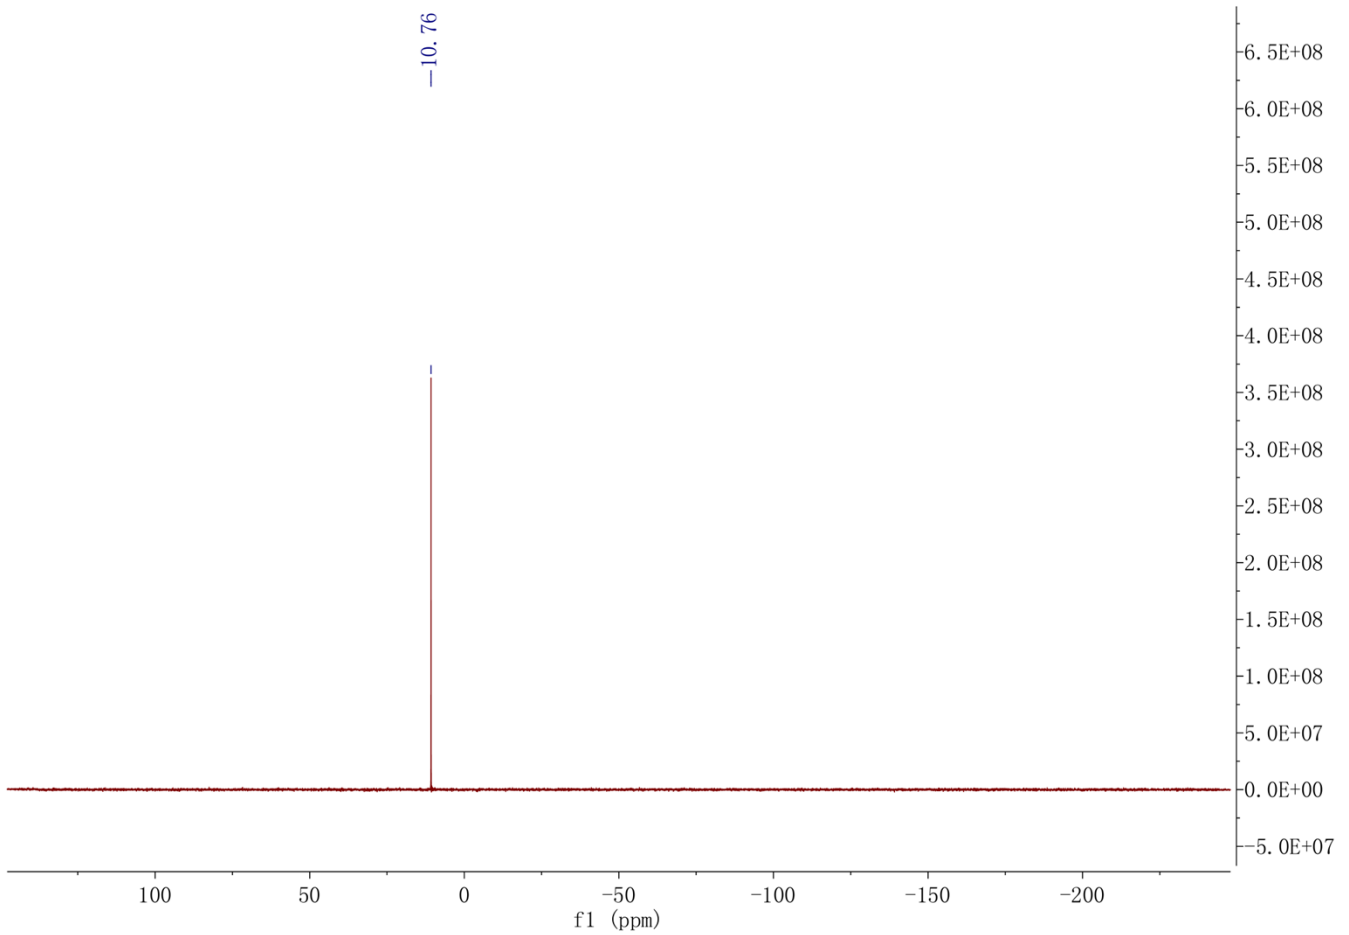

**Diethyl(5,5-dicyano-1',7'-dimethyl-2'-oxo-4-propylspiro[cyclopent[2]ene-1,3'-indolin]-3-yl)phosphonate (31):**

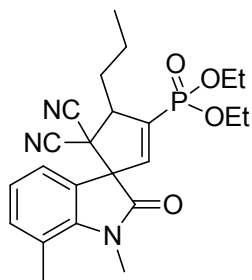

White solid; mp 151 °C. <sup>1</sup>H NMR (400 MHz, CDCl<sub>3</sub>): δ 7.44 (d, *J* = 7.5 Hz, 1H), 7.23 (d, *J* = 7.7 Hz, 1H), 7.10 (t, *J* = 7.7 Hz, 1H), 6.38 (d, *J* = 11.1 Hz, 1H), 4.29 (d, *J* = 9.6 Hz, 1H), 4.15-4.26 (m, 4H), 3.56 (s, 3H), 2.63 (s, 3H), 2.22-2.35 (m, 1H), 1.94 (td, *J* = 14.8, 4.3 Hz, 1H), 1.73 (dd, *J* = 11.8, 6.3 Hz, 1H), 1.59 (dd, *J* = 22.9,

6.9 Hz, 1H); <sup>13</sup>C NMR (101 MHz, CDCl<sub>3</sub>): δ 171.66, 144.60 (d, *J* = 12.6 Hz), 141.92, 140.87 (d, *J* = 186.6 Hz), 135.16, 124.45, 123.76, 123.59, 120.81, 113.54, 111.62, 65.02 (d, *J* = 19.5 Hz), 62.80 (d, *J* = 2.4 Hz), 62.75 (d, *J* = 3.7 Hz), 53.95 (d, *J* = 15.7 Hz), 49.96 (d, *J* = 12.7 Hz), 32.92, 30.49, 20.51, 19.07, 16.37 (d, *J* = 6.2 Hz), 13.90; <sup>31</sup>P NMR (162 MHz, CDCl<sub>3</sub>): δ 10.75; HRMS calculated [M+Na]<sup>+</sup> for C<sub>23</sub>H<sub>28</sub>N<sub>3</sub>O<sub>4</sub>P: 464.1715, found: 464.1715.

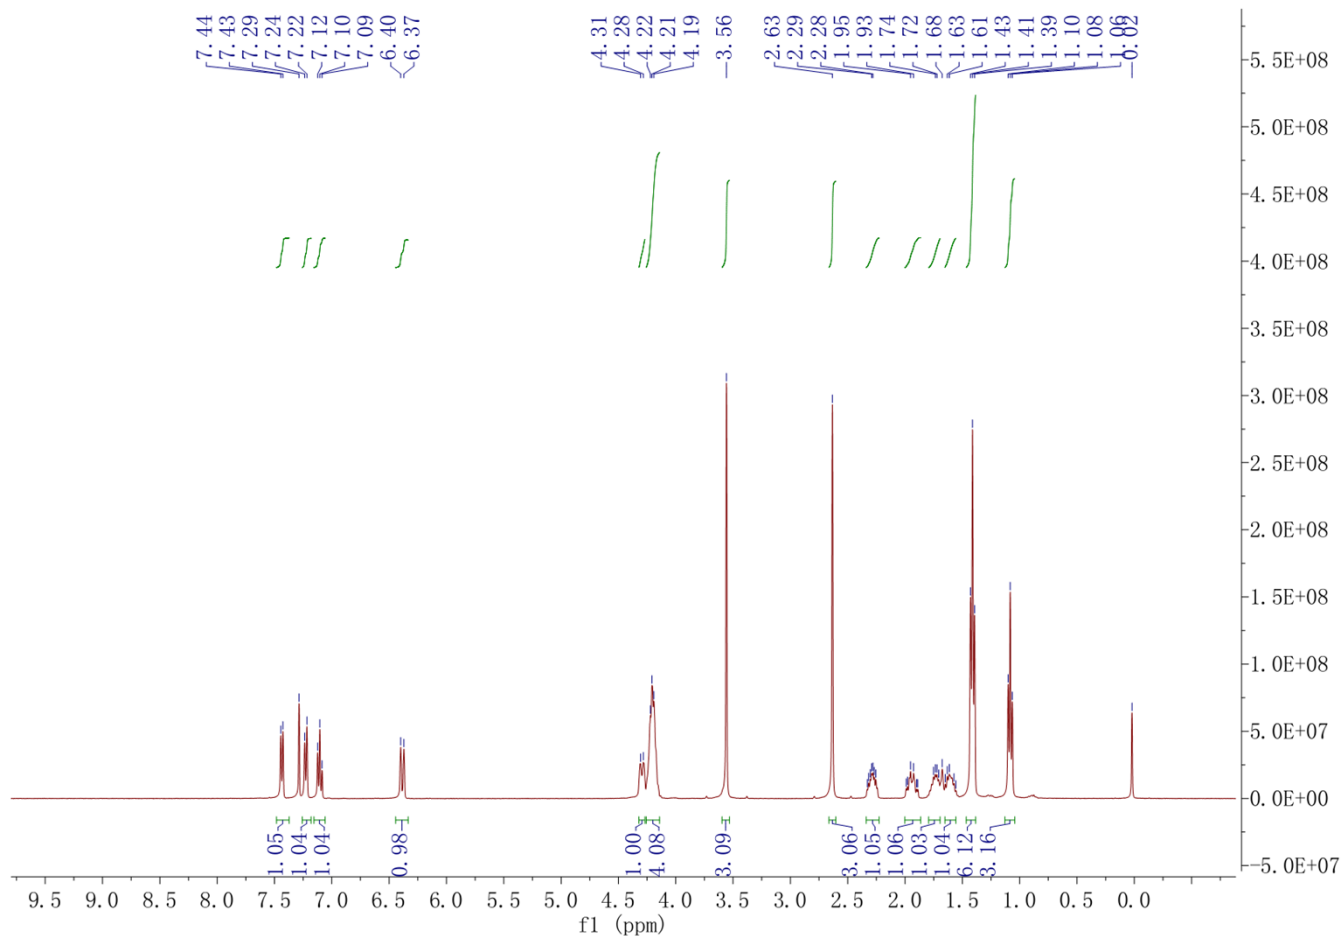



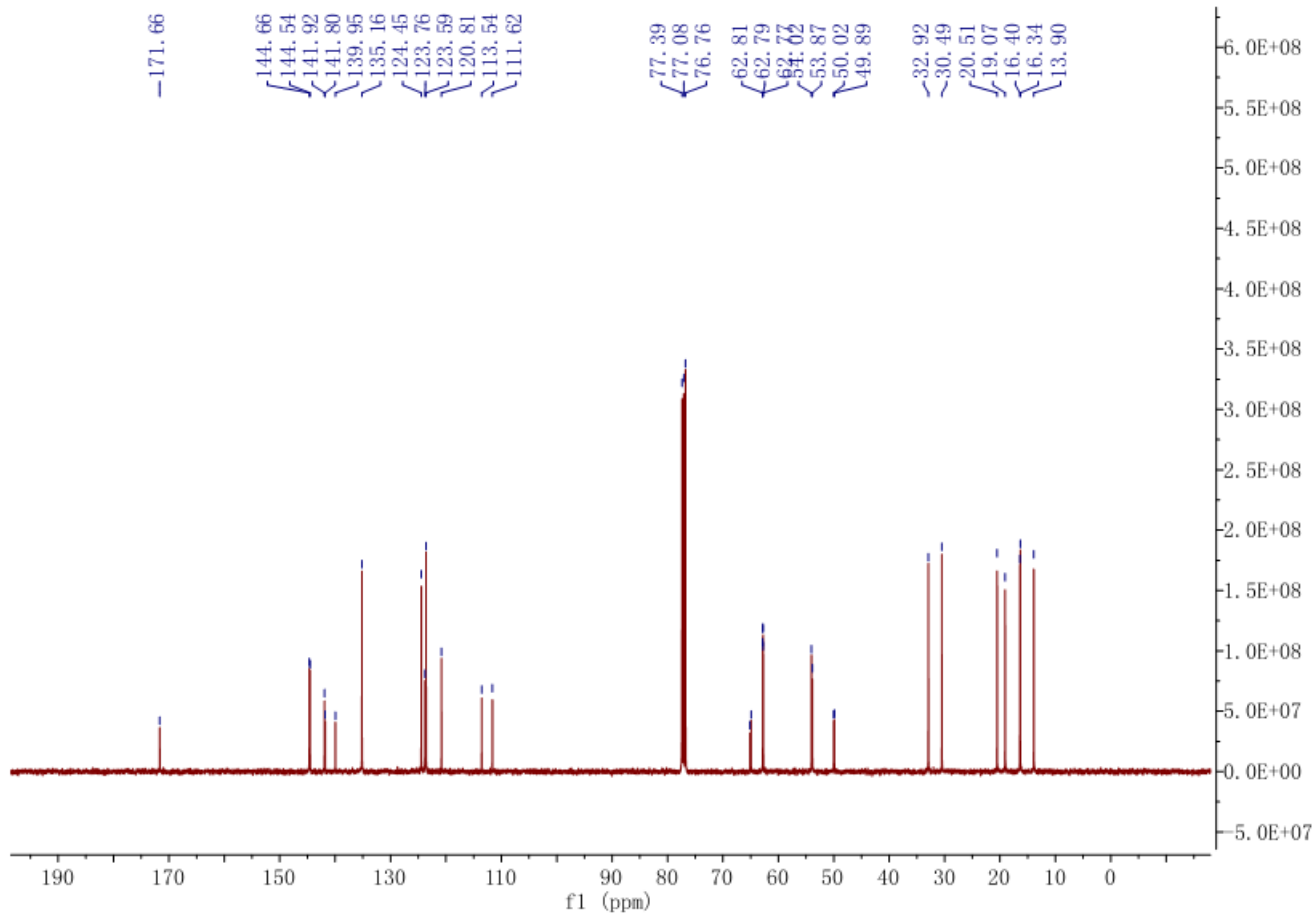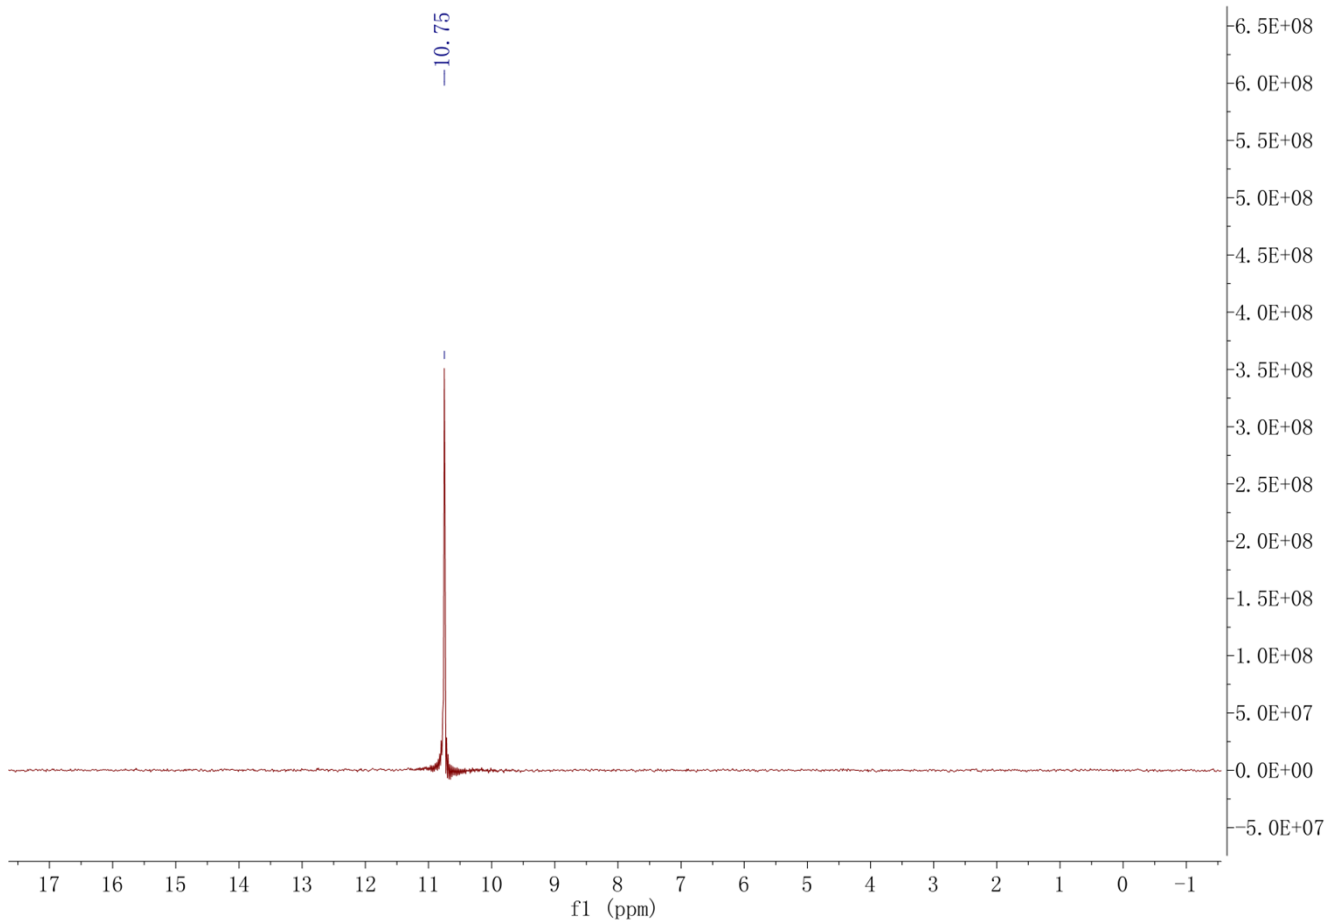

**Diethyl(5,5-dicyano-1',5',7'-trimethyl-2'-oxo-4-propylspiro[cyclopent[2]ene-1,3'-indolin]-3-yl)phosphonate (3m):**

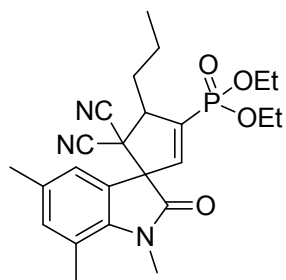

White solid; mp 151 °C.  $^1\text{H}$  NMR (400 MHz,  $\text{CDCl}_3$ ):  $\delta$  7.24 (s, 1H), 7.03 (s, 1H), 6.38 (d,  $J = 11.2$  Hz, 1H), 4.30 (d,  $J = 9.7$  Hz, 1H), 4.13-4.26 (m, 4H), 3.53 (s, 3H), 2.58 (s, 3H), 2.35 (s, 3H), 2.28 (ddd,  $J = 15.3, 10.8, 5.1$  Hz, 1H), 1.94 (td,  $J = 14.9, 4.6$  Hz, 1H), 1.69-1.80 (m, 1H), 1.60 (td,  $J = 13.9, 7.0$  Hz, 1H), 1.41 (t,  $J = 7.0$  Hz, 6H), 1.08 (t,  $J = 7.1$  Hz, 3H);  $^{13}\text{C}$  NMR (101 MHz,  $\text{CDCl}_3$ ):  $\delta$  171.56 (d,  $J = 2.2$  Hz), 144.89 (d,  $J = 12.9$  Hz), 140.67 (d,  $J = 186.6$  Hz), 139.44, 135.58, 133.29, 125.09, 123.84, 120.43, 113.59, 111.62, 65.07 (d,  $J = 19.1$  Hz), 62.75 (t,  $J = 4.8$  Hz), 53.91 (d,  $J = 15.4$  Hz), 50.01 (d,  $J = 13.3$  Hz), 32.91, 30.42, 20.82, 20.52, 18.89, 16.37 (d,  $J = 6.3$  Hz), 13.90;  $^{31}\text{P}$  NMR (162 MHz,  $\text{CDCl}_3$ ):  $\delta$  10.86. HRMS calculated  $[\text{M}+\text{Na}]^+$  for  $\text{C}_{24}\text{H}_{30}\text{N}_3\text{O}_4\text{P}$ : 478.1872, found: 478.1869.

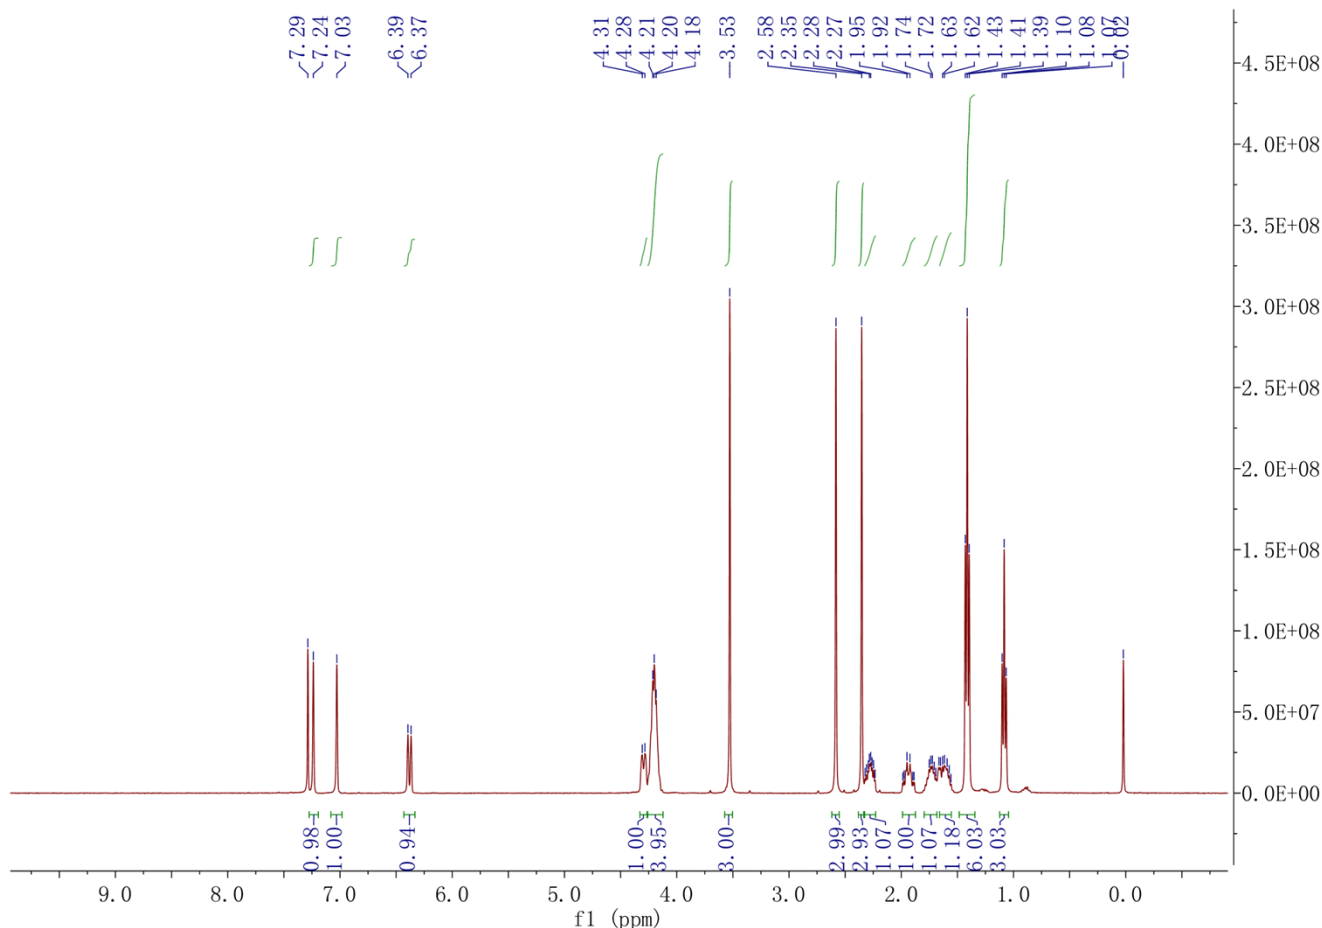

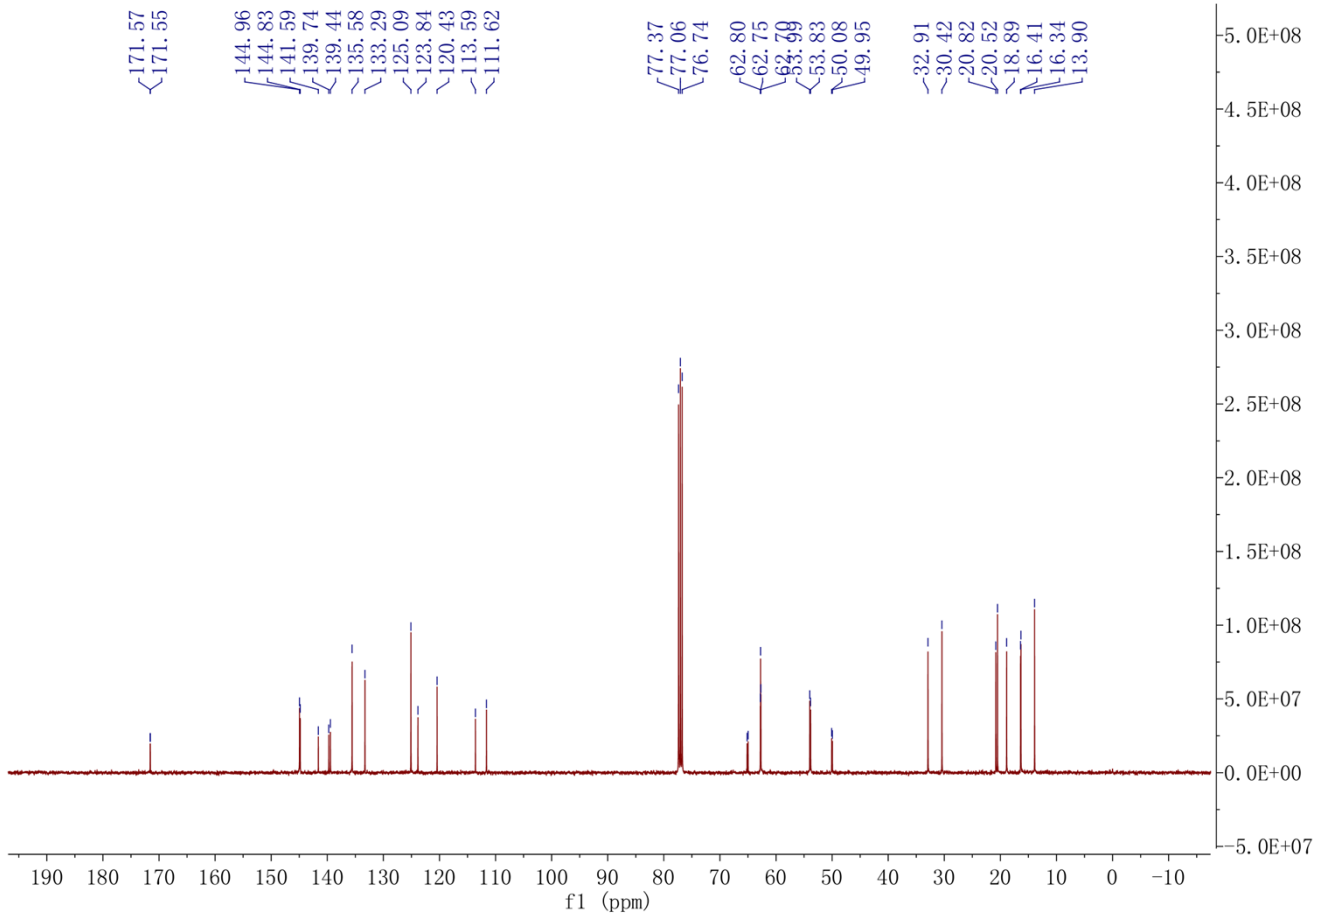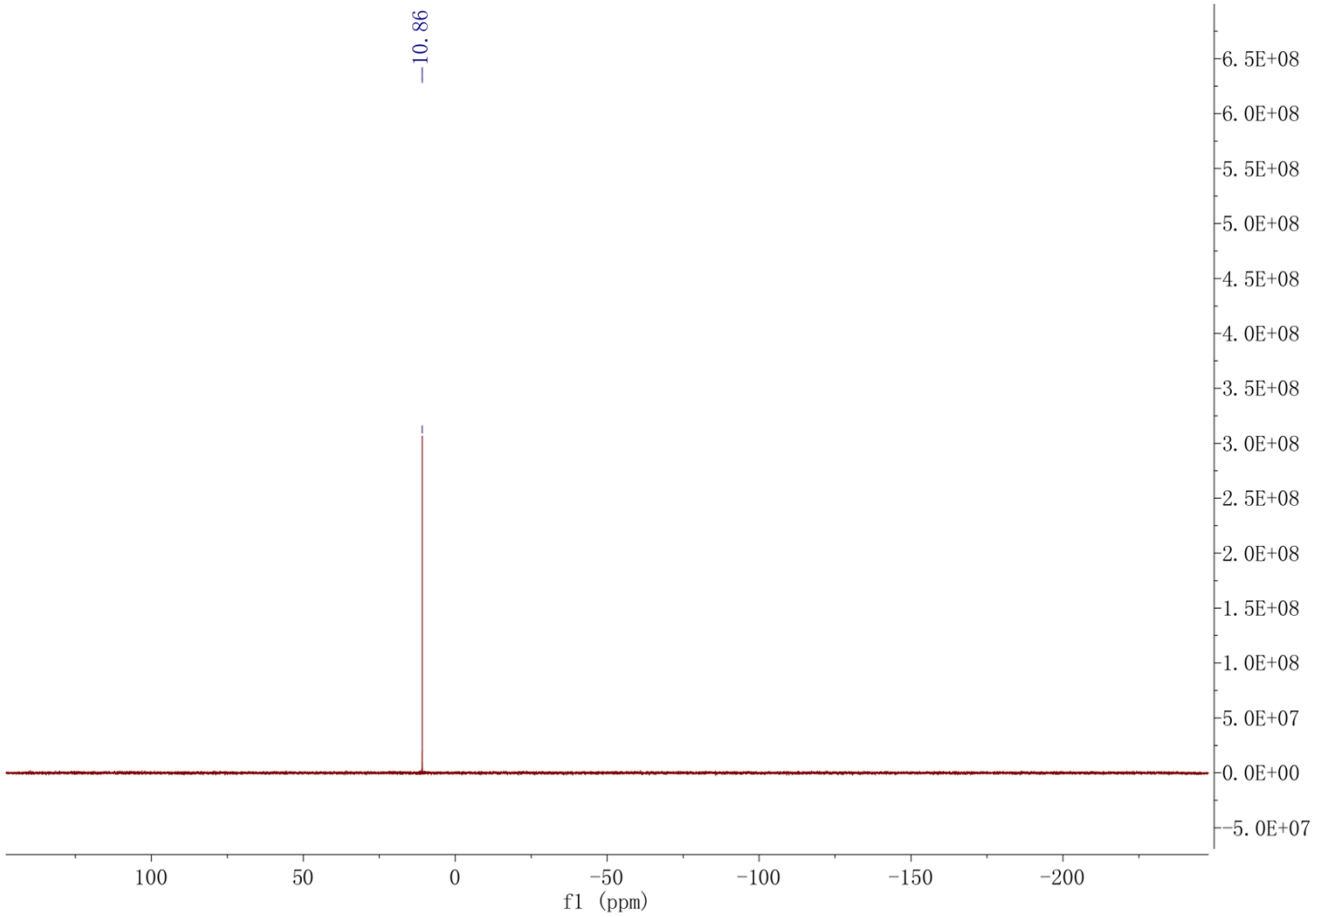

**Diethyl(5,5-dicyano-4-(furan-2-yl)-1'-methyl-2'-oxospiro[cyclopent[2]ene-1,3'-indolin]-3-yl)phosphonate (3n):**

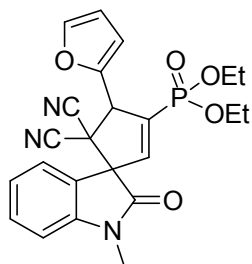

White solid; mp 188 °C.  $^1\text{H}$  NMR (400 MHz,  $\text{CDCl}_3$ ):  $\delta$  7.70 (d,  $J = 7.5$  Hz, 1H), 7.58 (s, 1H), 7.52 (t,  $J = 7.7$  Hz, 1H), 7.26 (t,  $J = 8.0$  Hz, 1H), 7.00 (d,  $J = 7.8$  Hz, 1H), 6.77 (s, 1H), 6.54 (d,  $J = 10.8$  Hz, 1H), 6.50 (s, 1H), 5.64 (s, 1H), 4.01-4.20 (m, 4H), 3.33 (s, 3H), 1.35 (t,  $J = 6.9$  Hz, 3H), 1.27 (t,  $J = 7.0$  Hz, 3H);  $^{13}\text{C}$  NMR (101 MHz,  $\text{CDCl}_3$ ):  $\delta$  170.78, 145.92, 145.45 (d,  $J = 12.7$  Hz), 144.14, 144.05, 138.17 (d,  $J = 191.6$  Hz), 131.55, 126.86, 123.98, 122.86, 112.56, 112.41, 111.78, 111.13, 109.26, 65.34 (d,  $J = 18.7$  Hz), 62.87 (t,  $J = 6.3$  Hz), 54.42 (d,  $J = 14.1$  Hz), 50.66 (d,  $J = 12.2$  Hz), 27.14, 16.28 (d,  $J = 6.2$  Hz), 16.19 (d,  $J = 7.2$  Hz);  $^{31}\text{P}$  NMR (162 MHz,  $\text{CDCl}_3$ ):  $\delta$  8.81; HRMS calculated  $[\text{M}+\text{Na}]^+$  for  $\text{C}_{23}\text{H}_{22}\text{N}_3\text{O}_5\text{P}$ : 474.1195, found: 474.1192.

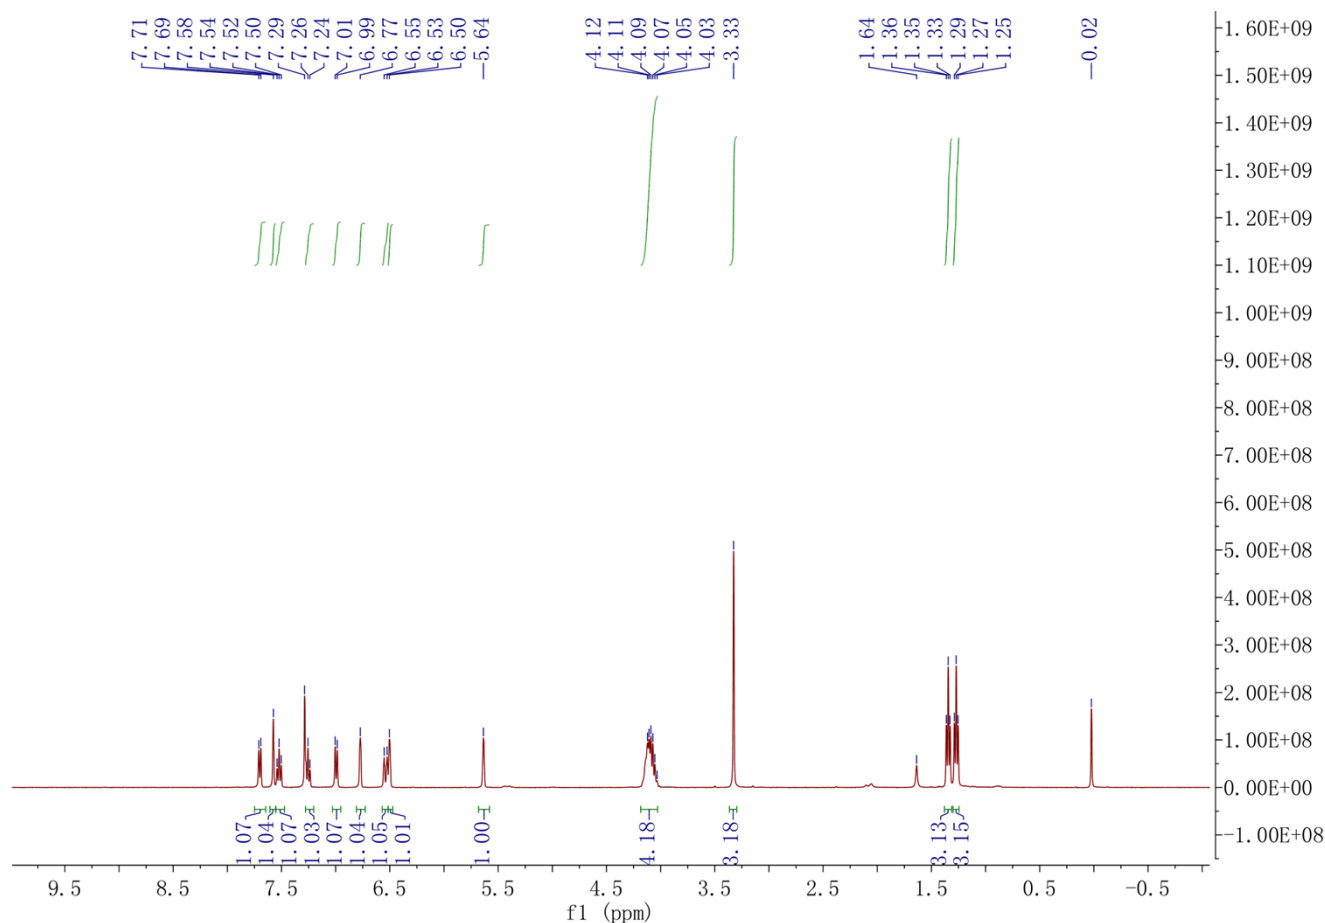

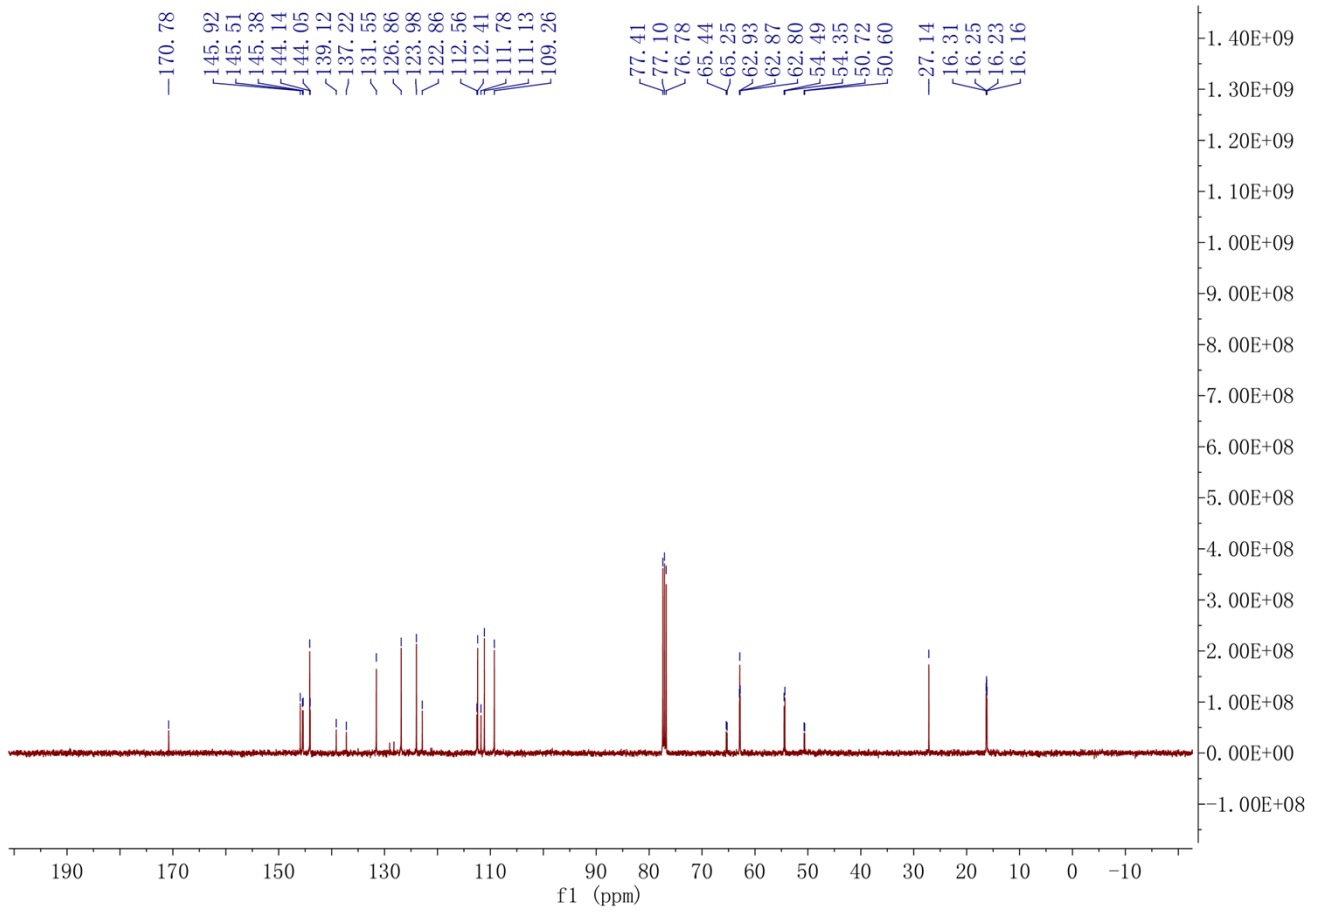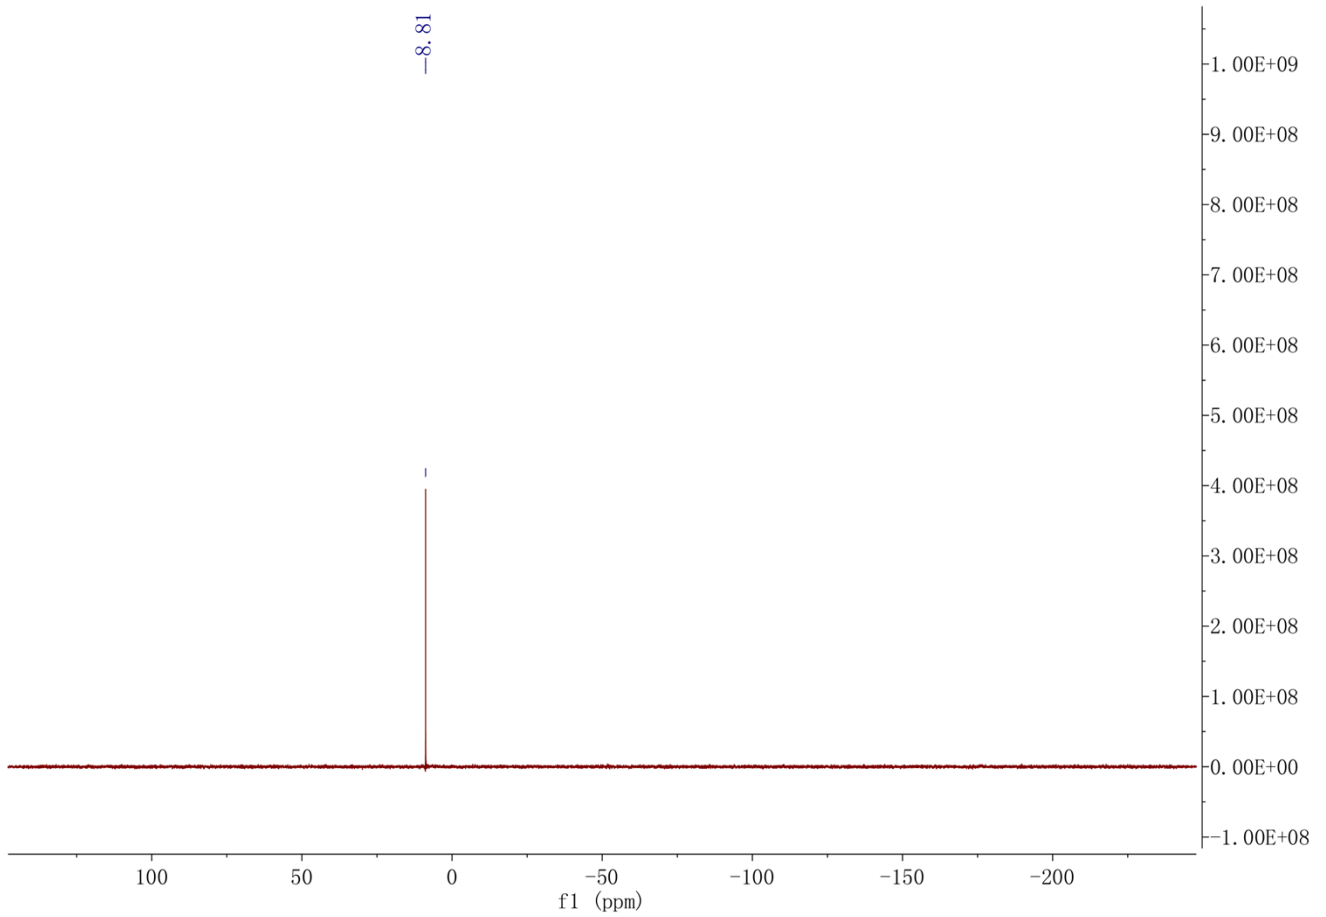

**Diethyl(1'-benzyl-5,5-dicyano-4-(furan-2-yl)-2'-oxospiro[cyclopent[2]ene-1,3'-indolin]-3-yl)phosphonate (3o):**

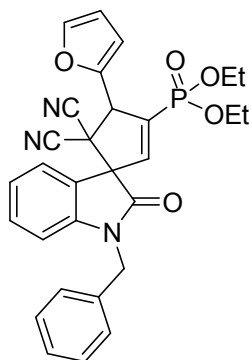

White solid; mp 155 °C.  $^1\text{H}$  NMR (400 MHz,  $\text{CDCl}_3$ ):  $\delta$  7.71 (d,  $J = 7.4$  Hz, 1H), 7.59 (s, 1H), 7.38 (d,  $J = 12.0$  Hz, 5H), 7.34 (d,  $J = 5.9$  Hz, 1H), 7.21 (t,  $J = 7.4$  Hz, 1H), 6.86 (d,  $J = 7.8$  Hz, 1H), 6.79 (s, 1H), 6.59 (d,  $J = 10.9$  Hz, 1H), 6.51 (s, 1H), 5.70 (s, 1H), 5.17 (d,  $J = 15.6$  Hz, 1H), 4.80 (d,  $J = 15.5$  Hz, 1H), 4.13 (d,  $J = 6.9$  Hz, 4H), 1.35 (t,  $J = 6.9$  Hz, 3H), 1.29 (t,  $J = 6.9$  Hz, 3H);  $^{13}\text{C}$  NMR (101 MHz,  $\text{CDCl}_3$ ):  $\delta$  171.01, 145.86, 145.67 (d,  $J = 12.4$  Hz), 144.19, 143.27, 138.30 (d,  $J = 191.5$  Hz), 134.29, 131.43, 129.07, 128.20, 127.56, 126.95, 123.98, 122.92, 112.72, 112.48, 111.79, 111.15, 110.35, 65.19 (d,  $J = 19.0$  Hz), 62.93 (d,  $J = 6.6$  Hz), 62.87 (d,  $J = 6.4$  Hz), 54.53 (d,  $J = 13.9$  Hz), 50.68 (d,  $J = 12.1$  Hz), 44.89, 16.31 (d,  $J = 6.6$  Hz), 16.21 (d,  $J = 6.6$  Hz);  $^{31}\text{P}$  NMR (162 MHz,  $\text{CDCl}_3$ ):  $\delta$  8.80; HRMS calculated  $[\text{M}+\text{Na}]^+$  for  $\text{C}_{29}\text{H}_{26}\text{N}_3\text{O}_5\text{P}$ : 550.1508, found: 550.1505.

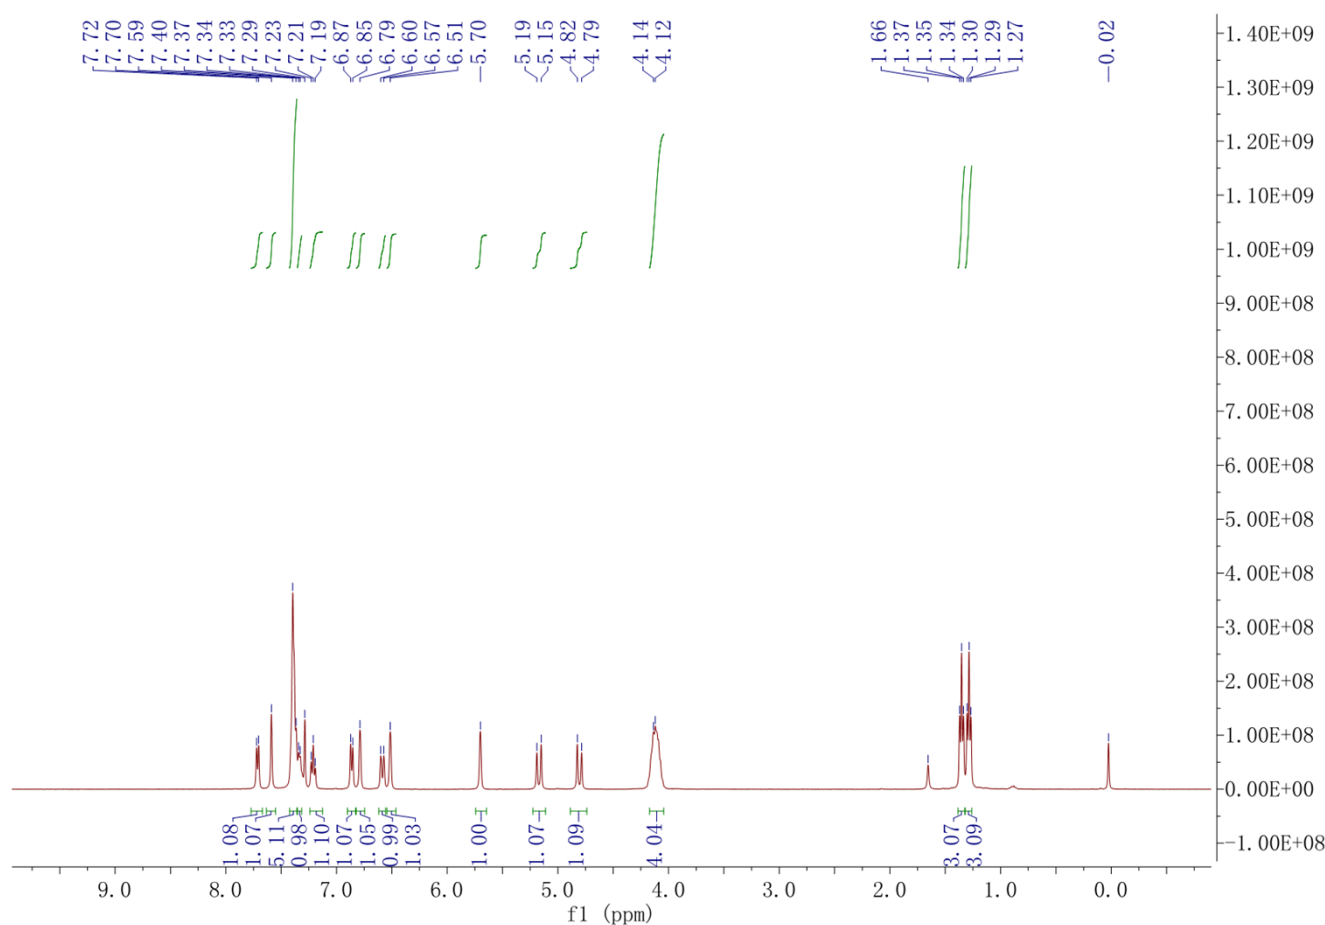

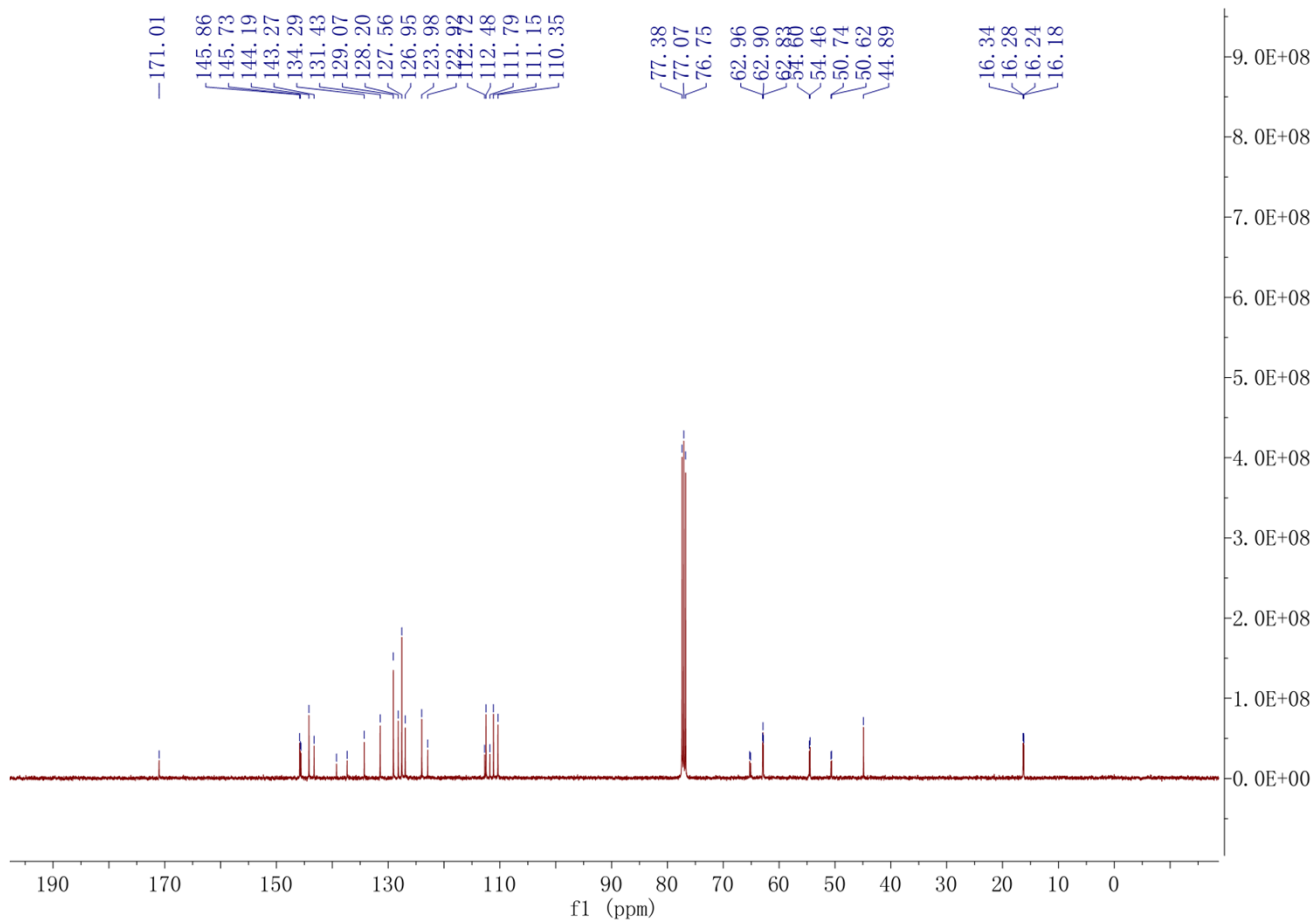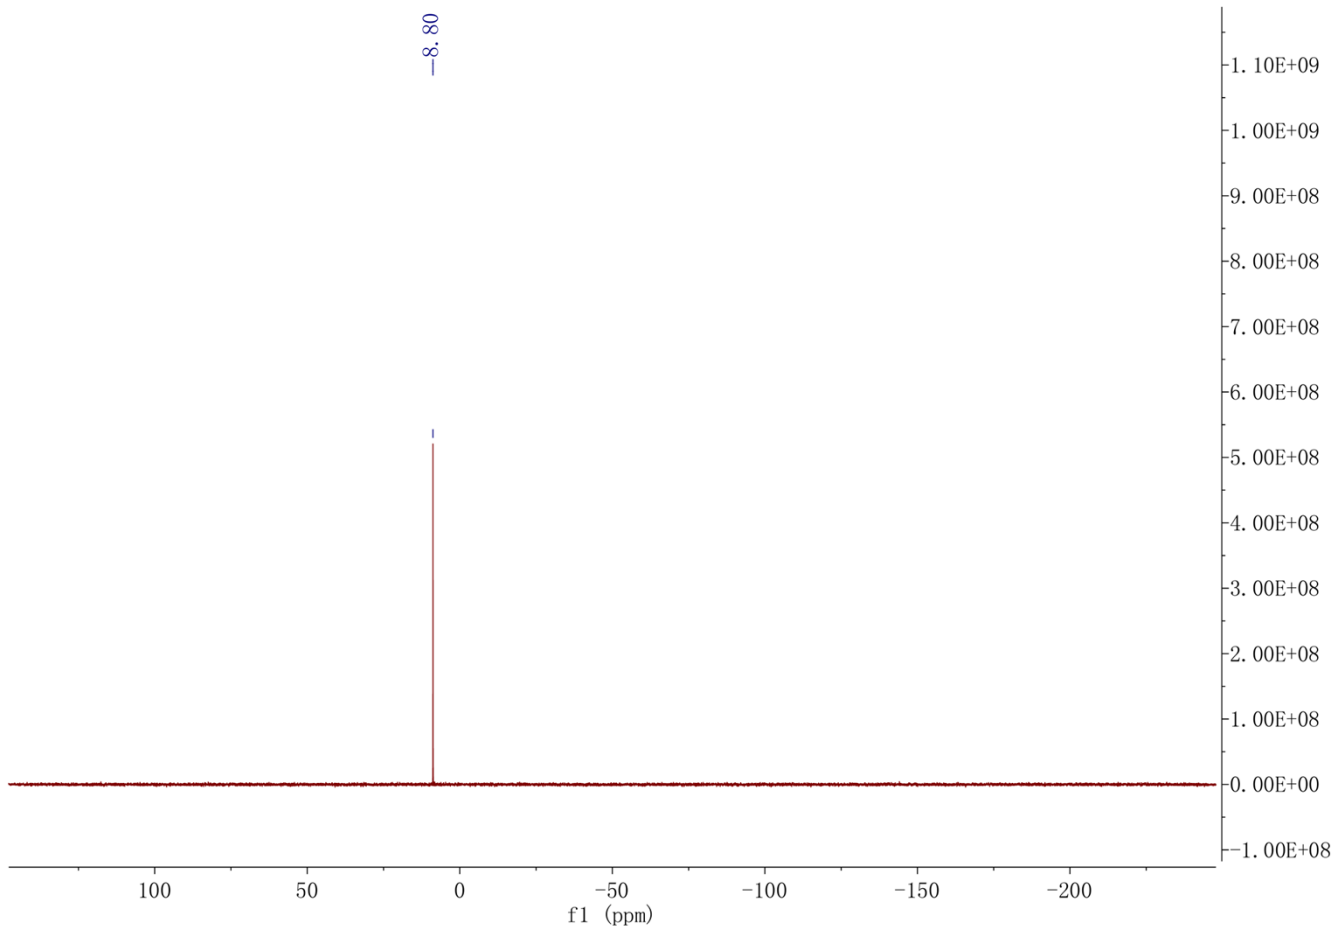

**Diethyl(5,5-dicyano-4-(furan-2-yl)-5'-methoxy-1'-methyl-2'-oxospiro[cyclopent[2]ene-1,3'-indolin]-3-yl)phosphonate (3p):**

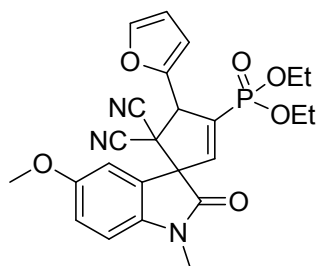

White solid; mp 175 °C.  $^1\text{H}$  NMR (400 MHz,  $\text{CDCl}_3$ ):  $\delta$  7.57 (s, 1H), 7.31 (s, 1H), 7.04 (d,  $J = 8.6$  Hz, 1H), 6.90 (d,  $J = 8.5$  Hz, 1H), 6.77 (s, 1H), 6.54 (d,  $J = 10.9$  Hz, 1H), 6.50 (s, 1H), 5.63 (s, 1H), 4.02-4.16 (m, 4H), 3.85 (s, 3H), 3.30 (s, 3H), 1.35 (t,  $J = 6.9$  Hz, 3H), 1.26 (t,  $J = 7.0$  Hz, 3H);  $^{13}\text{C}$  NMR (101 MHz,  $\text{CDCl}_3$ ):  $\delta$  170.50, 156.71, 145.95, 145.44 (d,  $J = 12.6$  Hz), 144.13, 139.10, 137.19, 123.83, 116.77, 113.33, 112.53, 112.41, 111.81, 111.13, 109.81, 65.68 (d,  $J = 18.6$  Hz), 62.91 (d,  $J = 5.4$  Hz), 62.83 (d,  $J = 5.7$  Hz), 55.97, 54.44 (d,  $J = 14.0$  Hz), 50.70 (d,  $J = 11.9$  Hz), 27.19, 16.28 (d,  $J = 6.3$  Hz), 16.18 (d,  $J = 6.6$  Hz);  $^{31}\text{P}$  NMR (162 MHz,  $\text{CDCl}_3$ ):  $\delta$  8.86; HRMS calculated  $[\text{M}+\text{Na}]^+$  for  $\text{C}_{24}\text{H}_{24}\text{N}_3\text{O}_6\text{P}$ : 504.1300, found: 504.1299.

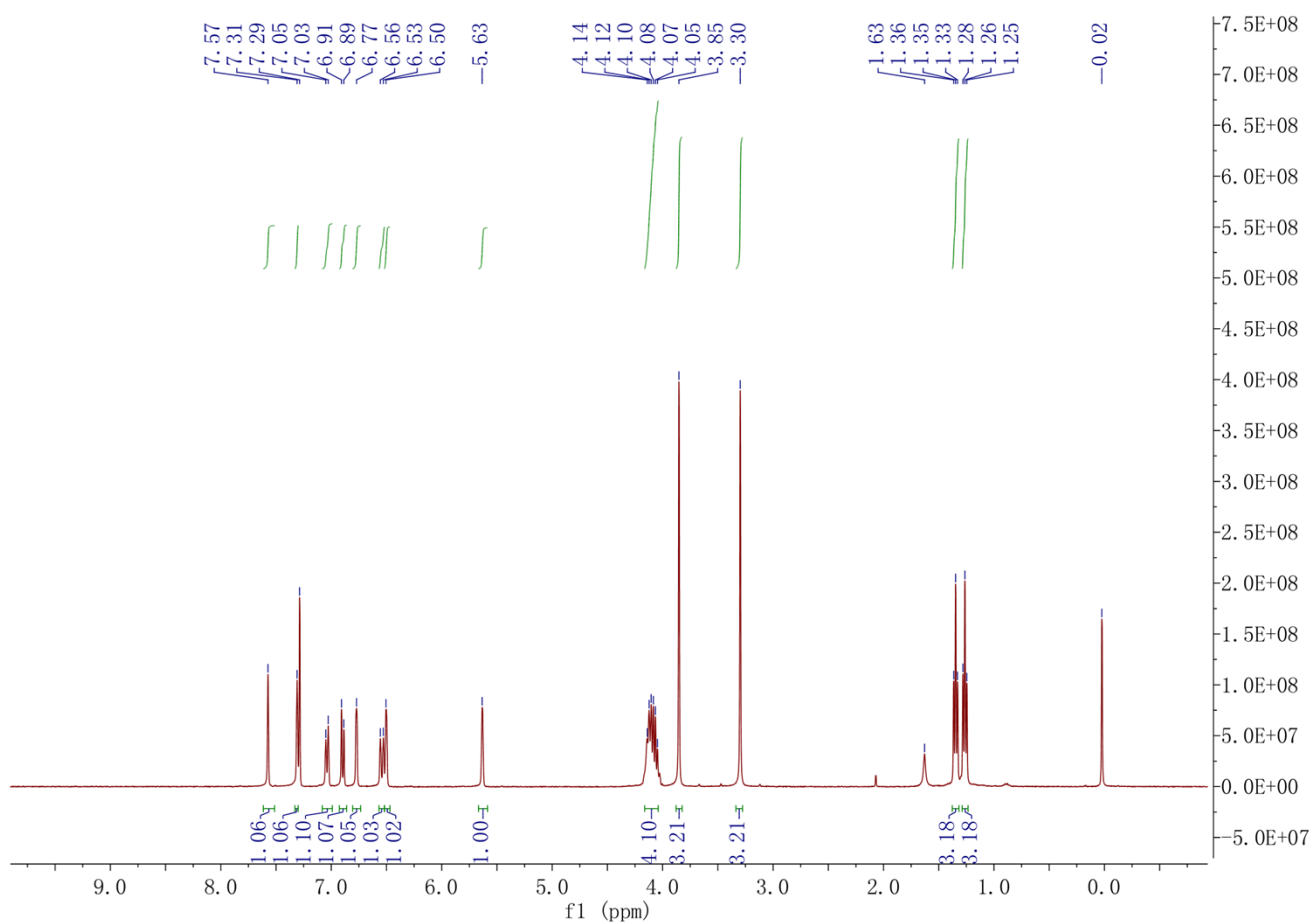



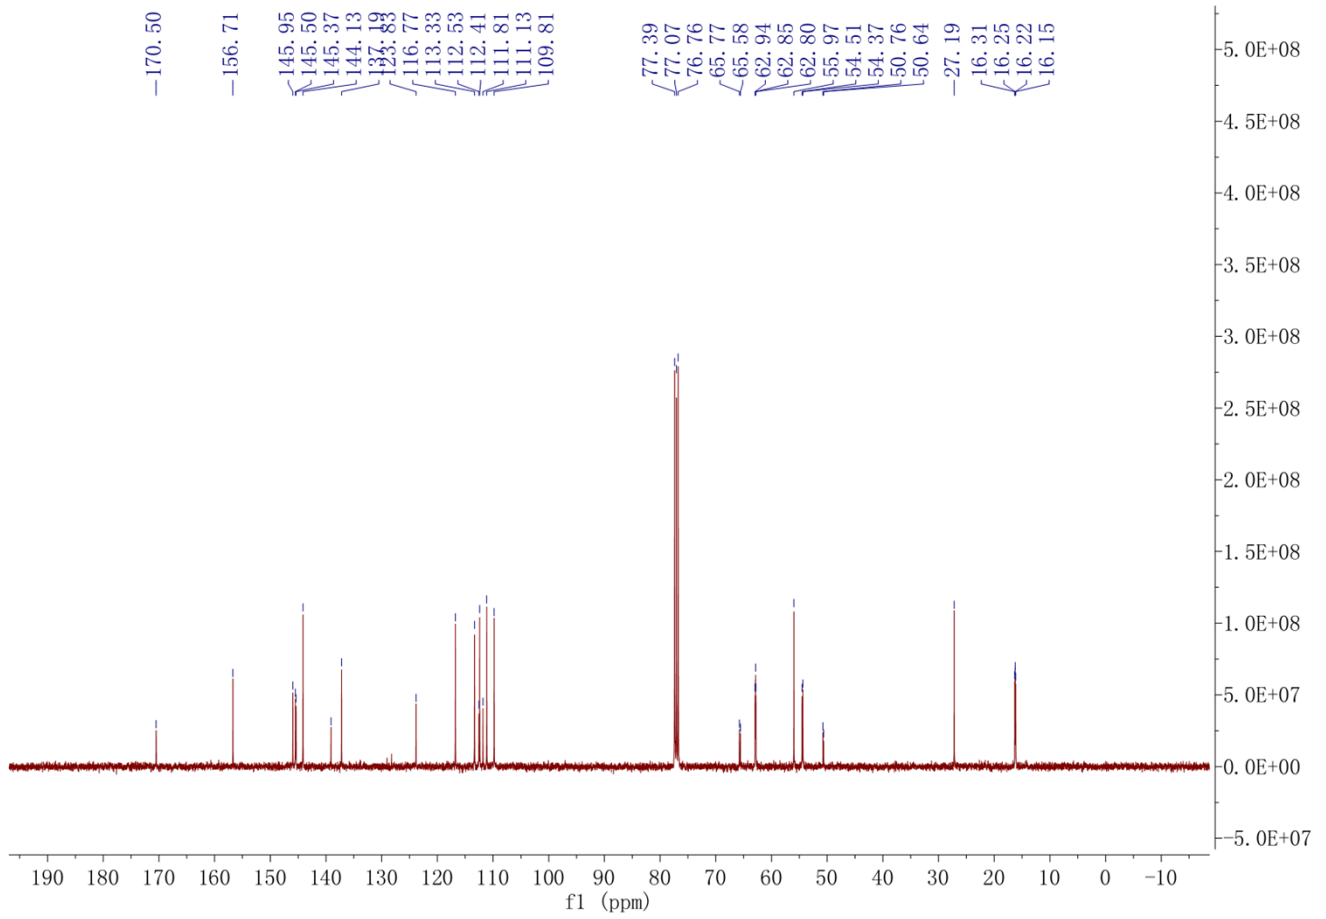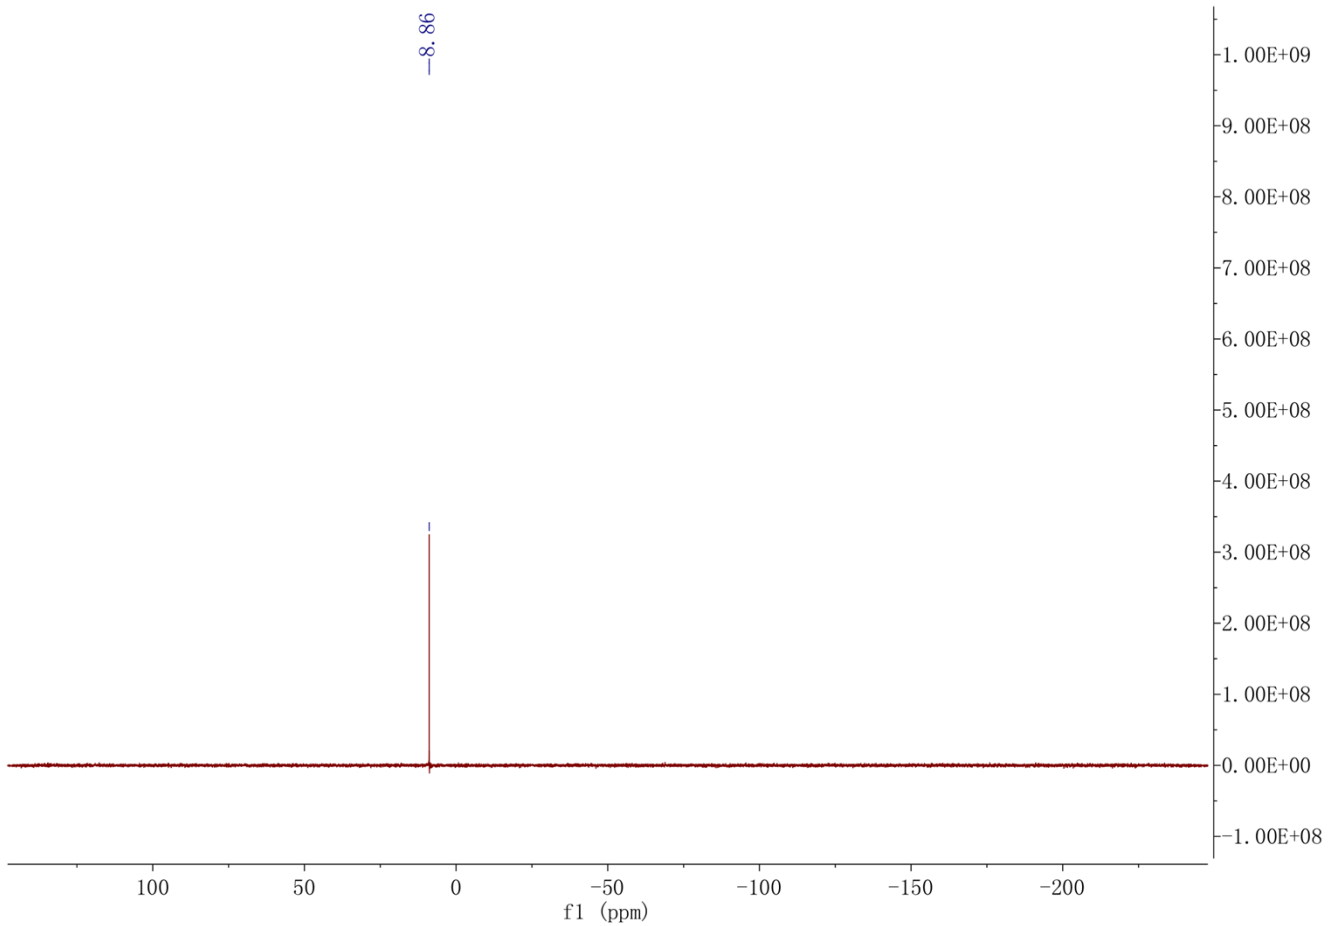

**Diethyl(5,5-dicyano-4-(furan-2-yl)-6'-methoxy-1'-methyl-2'-oxospiro[cyclopent[2]ene-1,3'-indolin]-3-yl)phosphonate (3q):**

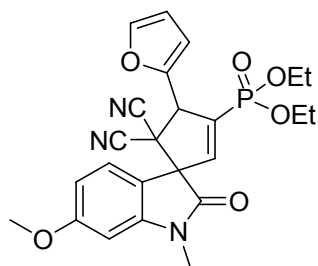

White solid; mp 153 °C.  $^1\text{H}$  NMR (400 MHz,  $\text{CDCl}_3$ ):  $\delta$  7.49-7.65 (m, 2H), 6.67-6.80 (m, 2H), 6.52 (d,  $J = 15.5$  Hz, 3H), 5.58 (s, 1H), 4.03-4.16 (m, 4H), 3.90 (s, 3H), 3.29 (s, 3H), 1.34 (t,  $J = 7.0$  Hz, 3H), 1.26 (t,  $J = 7.0$  Hz, 3H);  $^{13}\text{C}$  NMR (101 MHz,  $\text{CDCl}_3$ ):  $\delta$  171.38, 162.63, 146.07, 145.93 (d,  $J = 12.3$  Hz), 145.48, 144.06, 137.78 (d,  $J = 191.4$  Hz), 127.83, 114.51, 112.66, 112.29, 111.95, 111.10, 107.55, 97.34, 65.29 (d,  $J = 18.8$  Hz), 62.86 (d,  $J = 6.8$  Hz), 62.79 (d,  $J = 7.1$  Hz), 55.74, 54.22 (d,  $J = 14.1$  Hz), 50.85 (d,  $J = 11.9$  Hz), 27.13, 16.28 (d,  $J = 6.6$  Hz), 16.18 (d,  $J = 6.8$  Hz);  $^{31}\text{P}$  NMR (162 MHz,  $\text{CDCl}_3$ ):  $\delta$  8.96; HRMS calculated  $[\text{M}+\text{Na}]^+$  for  $\text{C}_{24}\text{H}_{24}\text{N}_3\text{O}_6\text{P}$ : 504.1300, found: 504.1299.

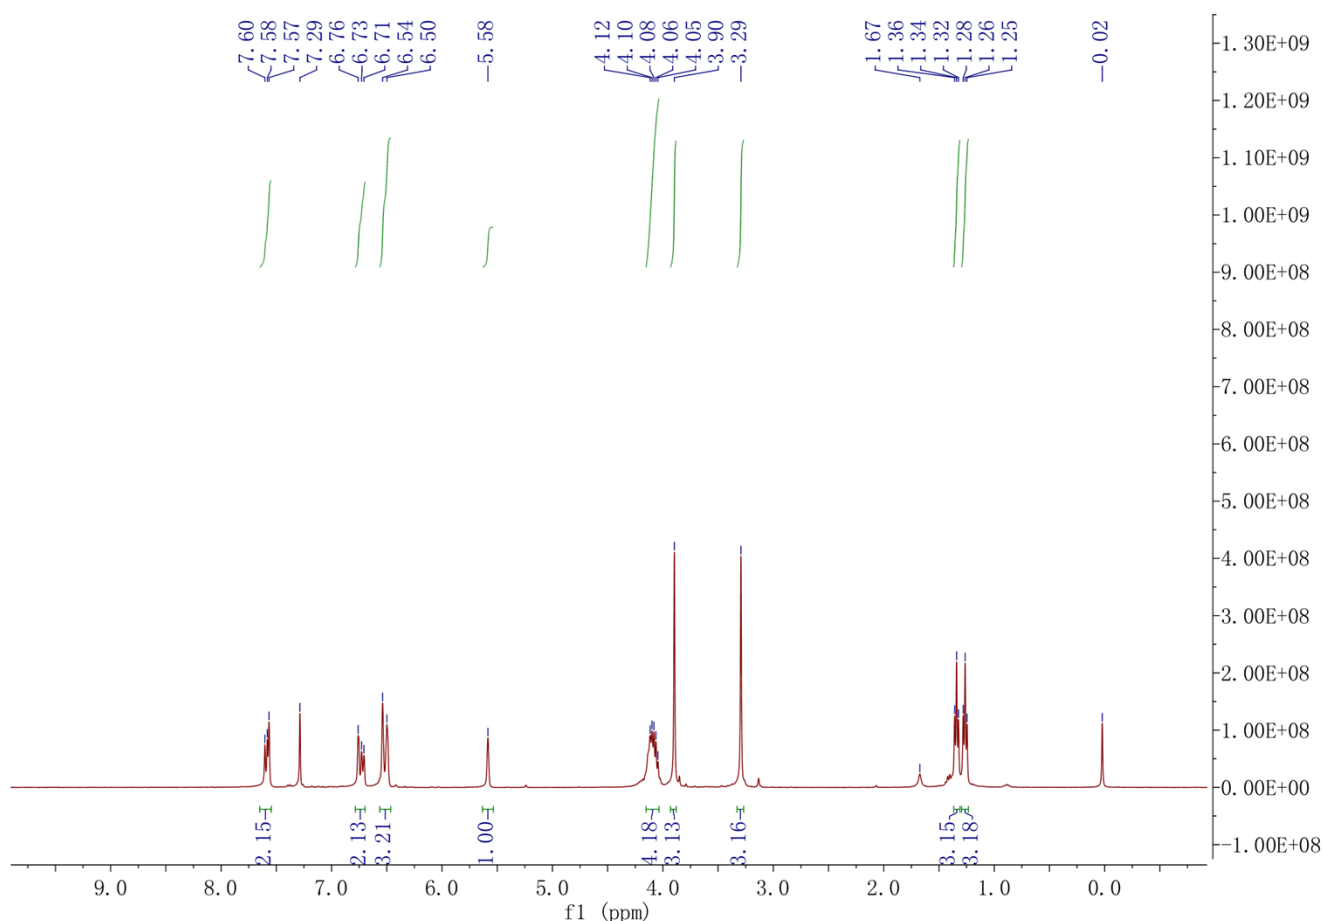

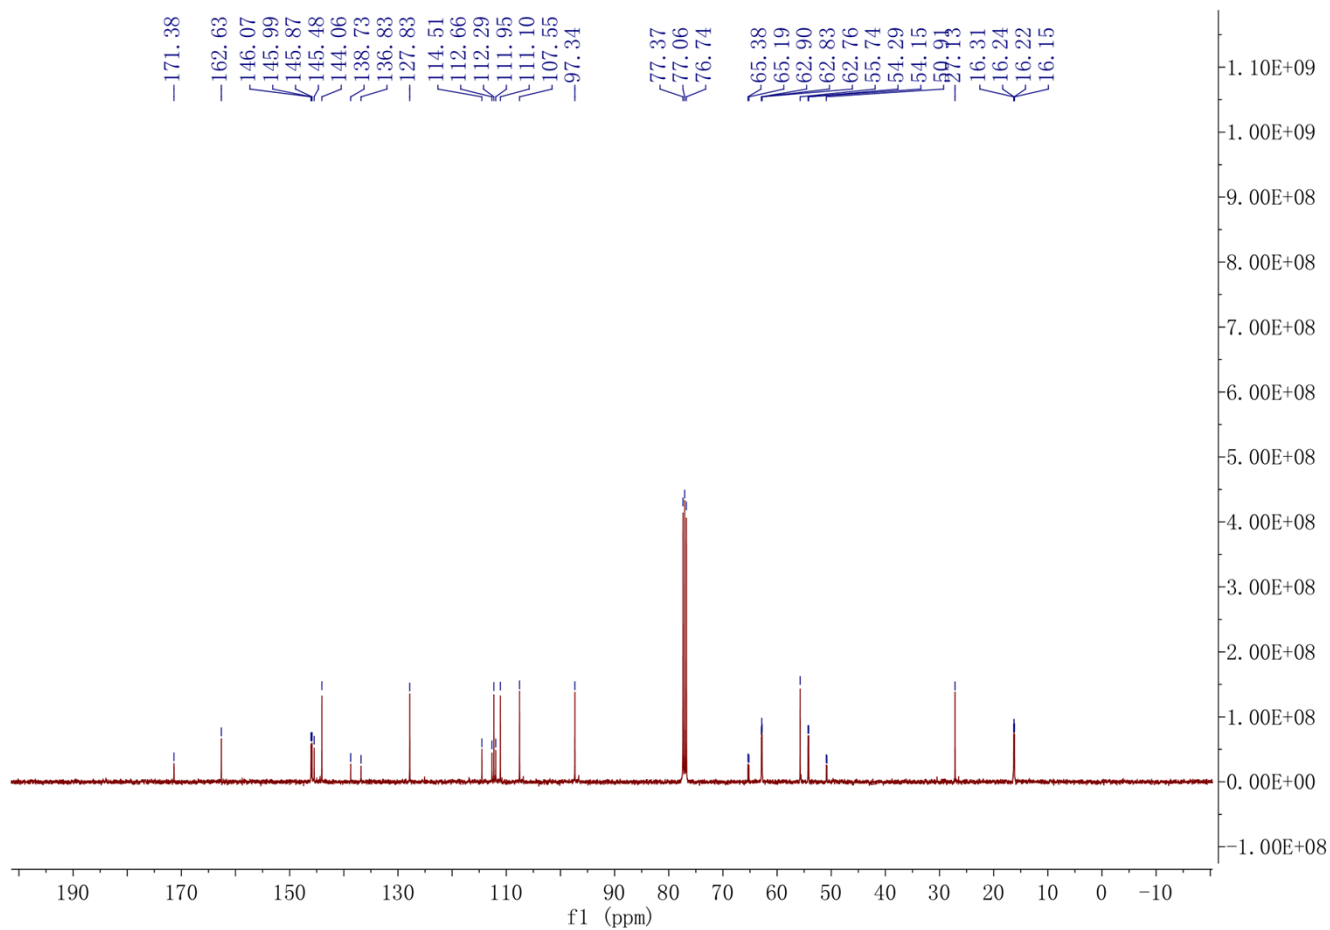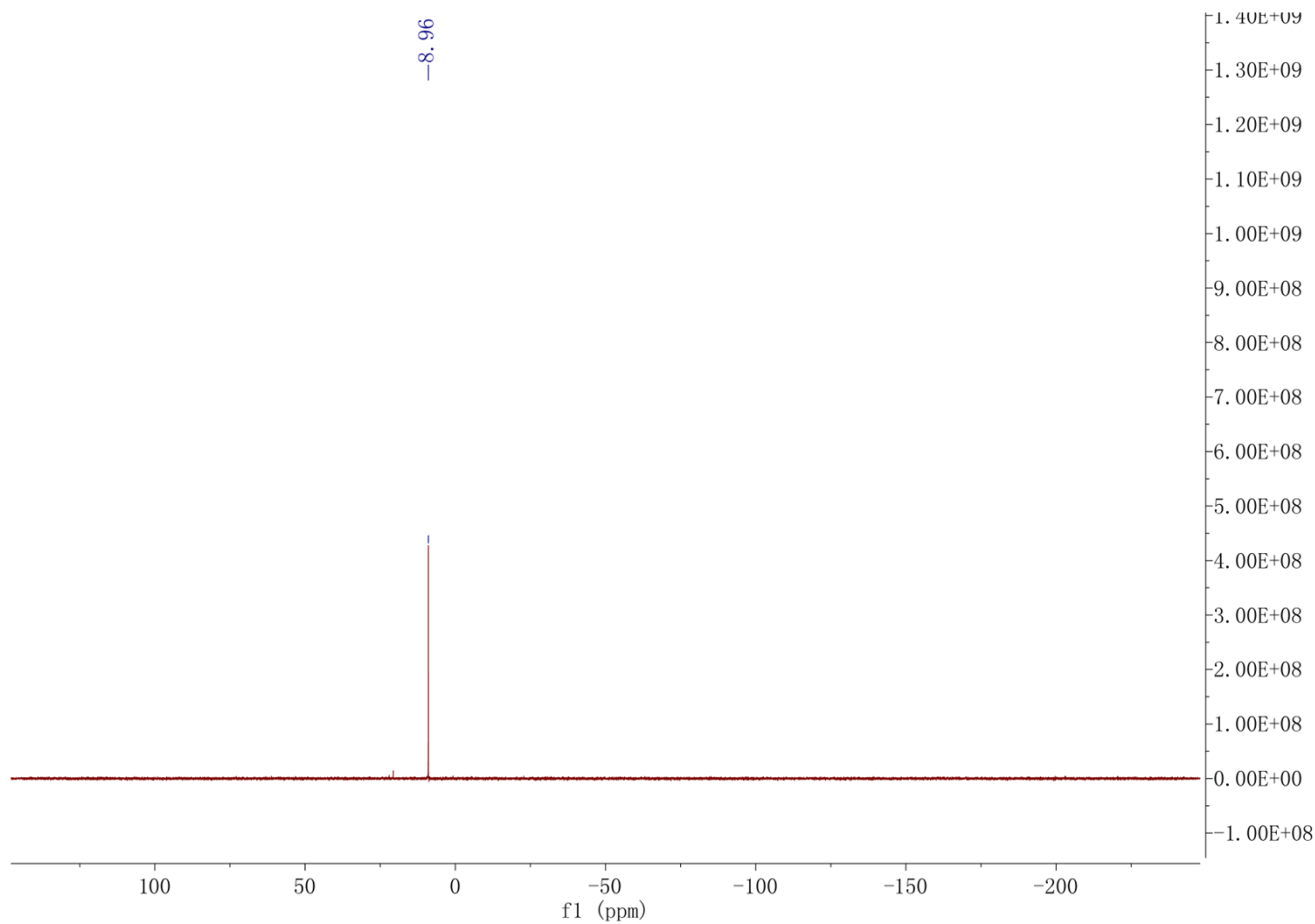

**Diethyl(5,5-dicyano-4-(furan-2-yl)-1',7'-dimethyl-2'-oxospiro[cyclopent[2]ene-1,3'-indolin]-3-yl)phosphonate (3r):**

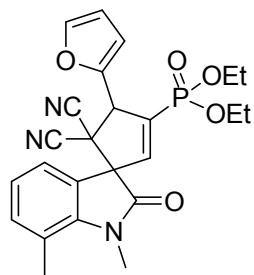

White solid; mp 163 °C.  $^1\text{H}$  NMR (400 MHz,  $\text{CDCl}_3$ ):  $\delta$  7.57 (s, 1H), 7.50 (d,  $J$  = 7.5 Hz, 1H), 7.24 (d,  $J$  = 7.7 Hz, 1H), 7.12 (t,  $J$  = 7.6 Hz, 1H), 6.76 (s, 1H), 6.51 (d,  $J$  = 11.3 Hz, 2H), 5.62 (s, 1H), 4.03-4.16 (m, 4H), 3.59 (s, 3H), 2.64 (s, 3H), 1.34 (t,  $J$  = 7.0 Hz, 3H), 1.27 (t,  $J$  = 7.0 Hz, 3H);  $^{13}\text{C}$  NMR (101 MHz,  $\text{CDCl}_3$ ):  $\delta$  171.55, 146.00, 145.65 (d,  $J$  = 12.5 Hz), 144.10, 141.76, 137.95 (d,  $J$  = 191.3 Hz), 135.28, 124.77, 123.76, 123.47, 120.91, 112.70, 112.37, 111.69, 111.11, 64.94 (d,  $J$  = 18.7 Hz), 62.84 (t,  $J$  = 6.2 Hz), 54.42 (d,  $J$  = 13.9 Hz), 51.07 (d,  $J$  = 12.4 Hz), 30.60, 19.06, 16.28 (d,  $J$  = 6.8 Hz), 16.19 (d,  $J$  = 6.6 Hz);  $^{31}\text{P}$  NMR (162 MHz,  $\text{CDCl}_3$ ):  $\delta$  8.89; HRMS calculated  $[\text{M}+\text{Na}]^+$  for  $\text{C}_{24}\text{H}_{24}\text{N}_3\text{O}_5\text{P}$ : 488.1351, found:488.1353.

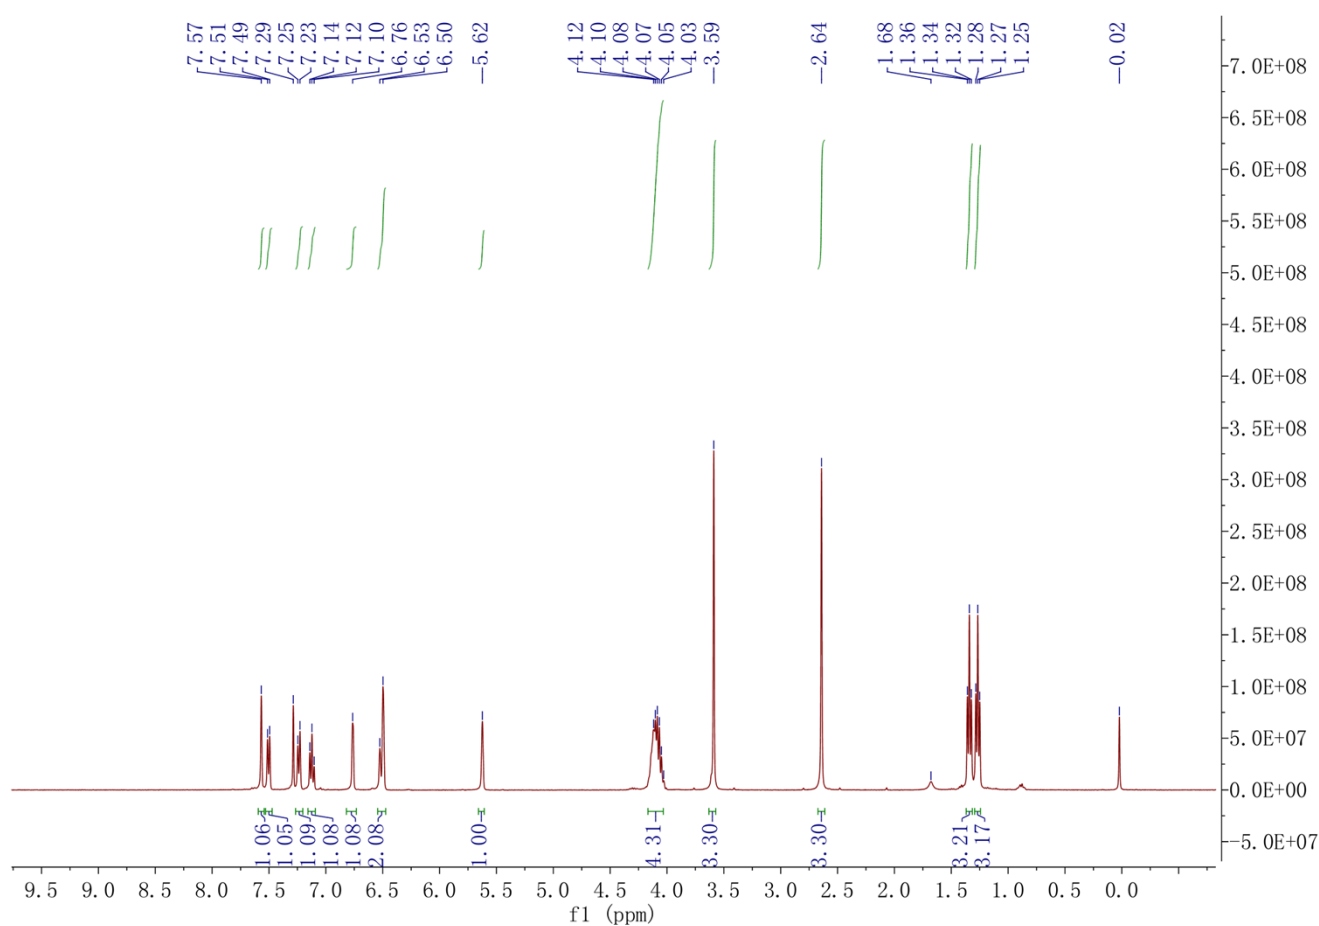

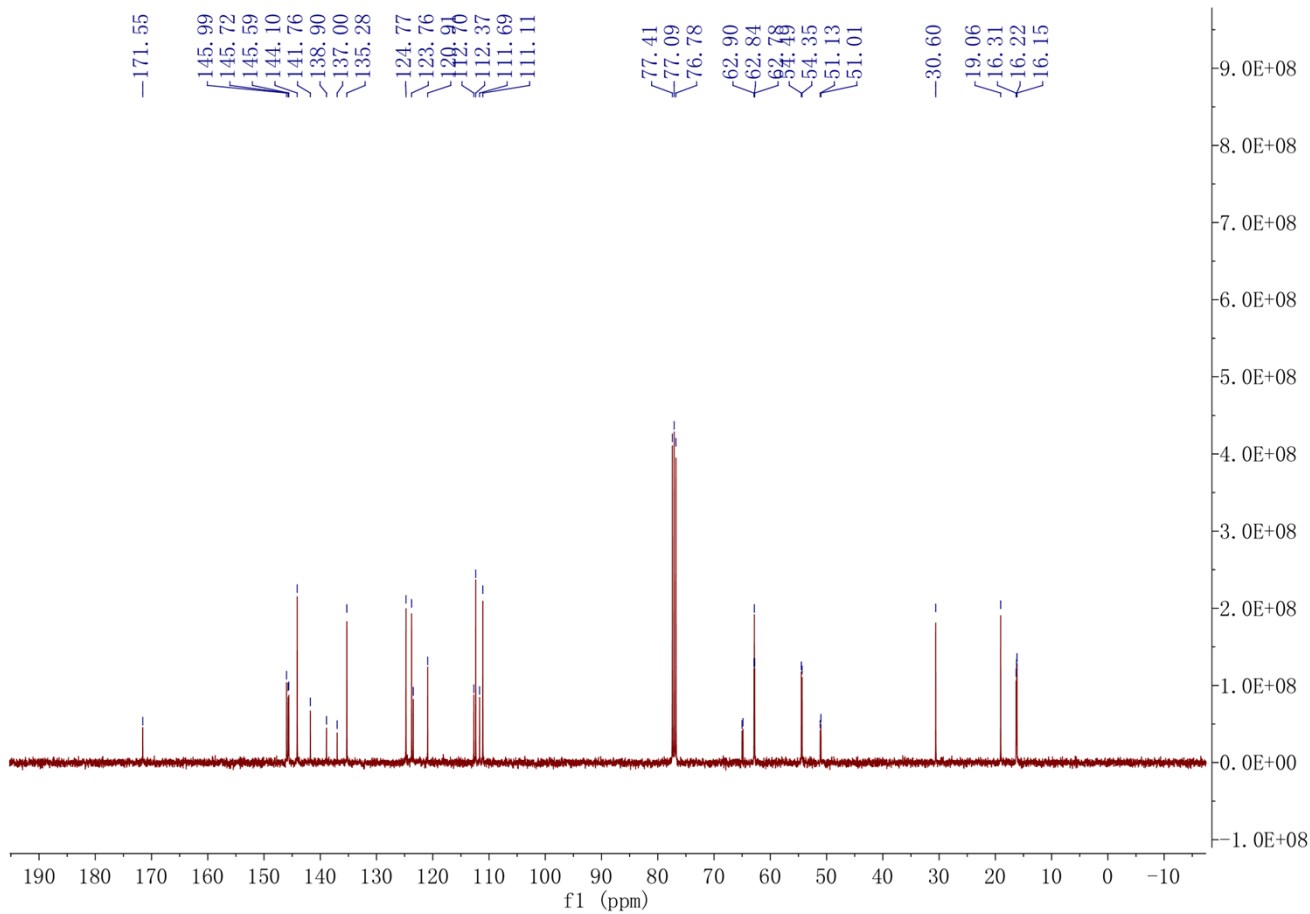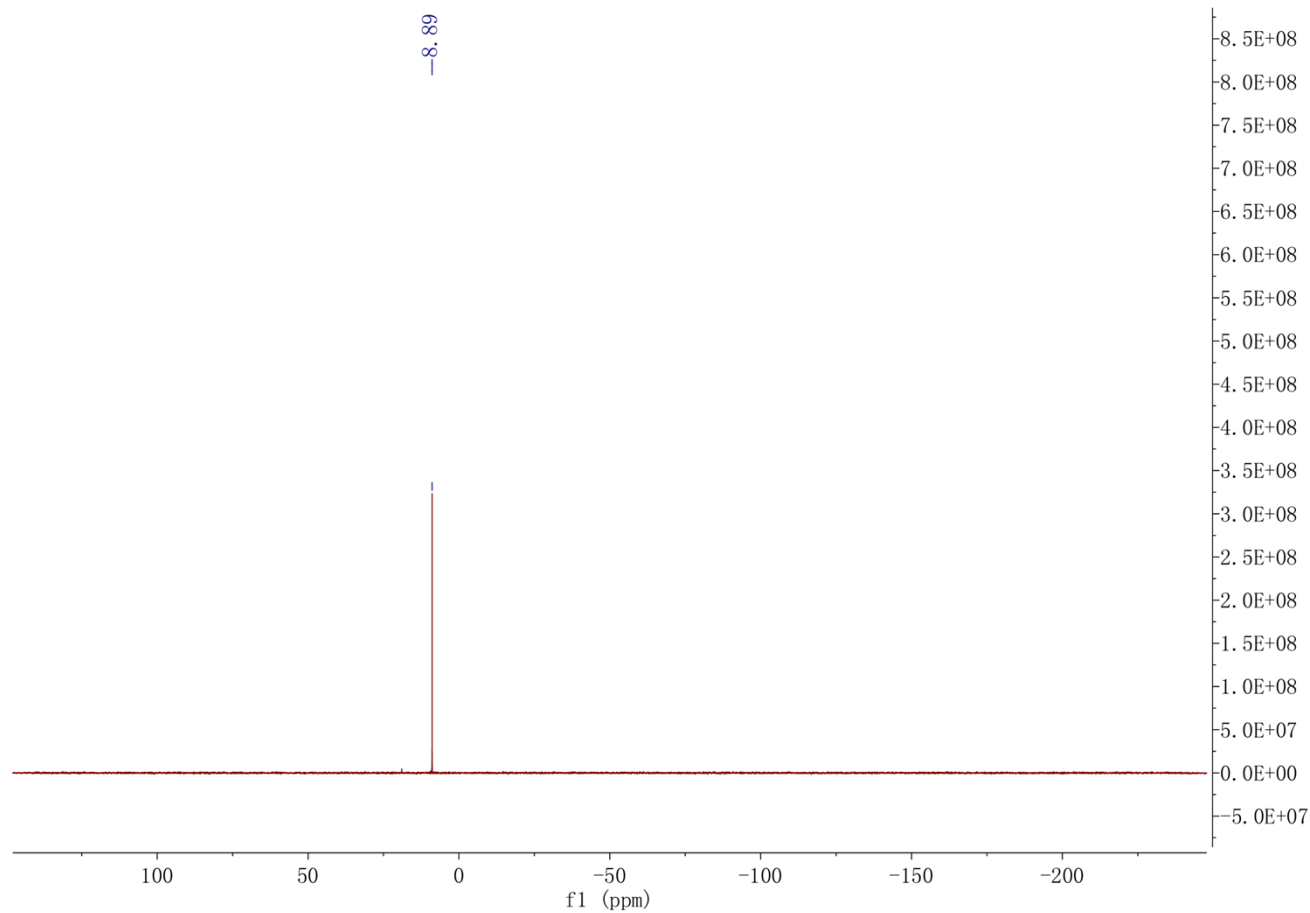

**Diethyl(5'-bromo-5,5-dicyano-4-(furan-2-yl)-1'-methyl-2'-oxospiro[cyclopent[2]ene-1,3'-indolin]-3-yl)phosphonate (3s):**

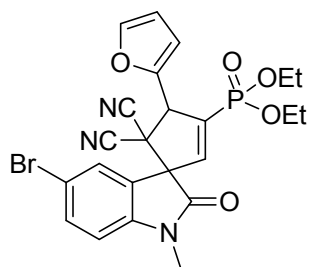

White solid; mp 193 °C.  $^1\text{H}$  NMR (400 MHz,  $\text{CDCl}_3$ ):  $\delta$  7.83 (s, 1H), 7.66 (d,  $J = 8.2$  Hz, 1H), 7.58 (s, 1H), 6.88 (d,  $J = 8.3$  Hz, 1H), 6.77 (s, 1H), 6.51 (s, 2H), 5.61 (s, 1H), 4.10 (dt,  $J = 14.8, 7.4$  Hz, 4H), 3.31 (s, 3H), 1.34 (t,  $J = 7.0$  Hz, 3H), 1.28 (t,  $J = 7.0$  Hz, 3H);  $^{13}\text{C}$  NMR (101 MHz,  $\text{CDCl}_3$ ):  $\delta$  170.28, 145.62, 144.46 (d,  $J = 12.7$  Hz), 144.24, 143.09, 138.81 (d,  $J = 191.6$  Hz), 134.48, 130.03, 128.64 (d,  $J = 81.4$  Hz), 124.75, 116.57, 112.55, 111.92 (d,  $J = 78.6$  Hz), 111.19, 110.67, 65.07 (d,  $J = 18.9$  Hz), 62.96 (d,  $J = 4.0$  Hz), 62.91 (d,  $J = 4.4$  Hz), 54.56 (d,  $J = 13.9$  Hz), 50.46 (d,  $J = 12.4$  Hz), 27.26, 16.28 (d,  $J = 7.7$  Hz), 16.21 (d,  $J = 7.7$  Hz);  $^{31}\text{P}$  NMR (162 MHz,  $\text{CDCl}_3$ ):  $\delta$  8.43; HRMS calculated  $[\text{M}+\text{Na}]^+$  for  $\text{C}_{23}\text{H}_{21}\text{BrN}_3\text{O}_5\text{P}$ : 552.0300, found:552.0293.

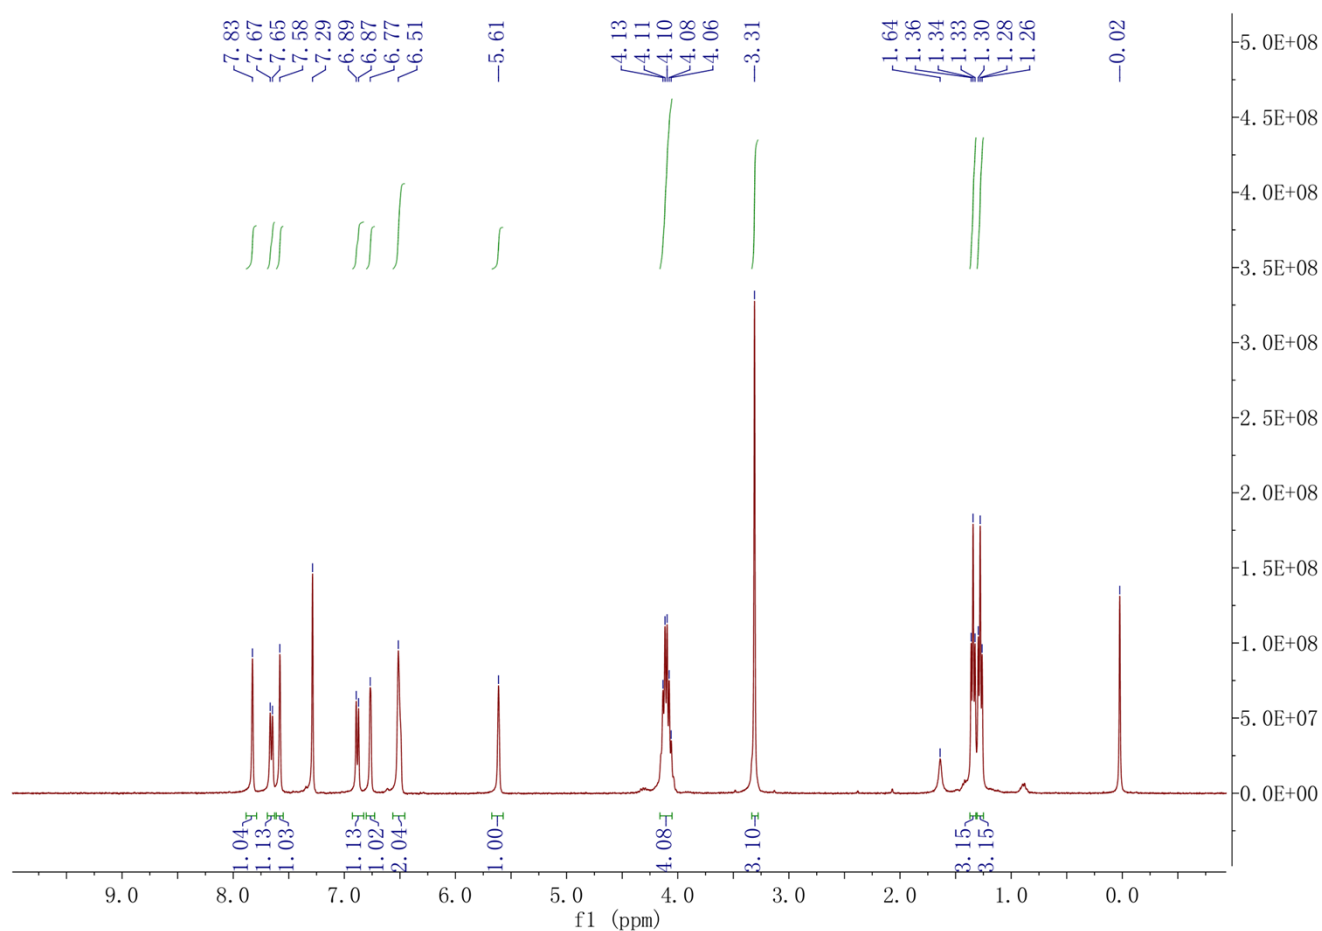

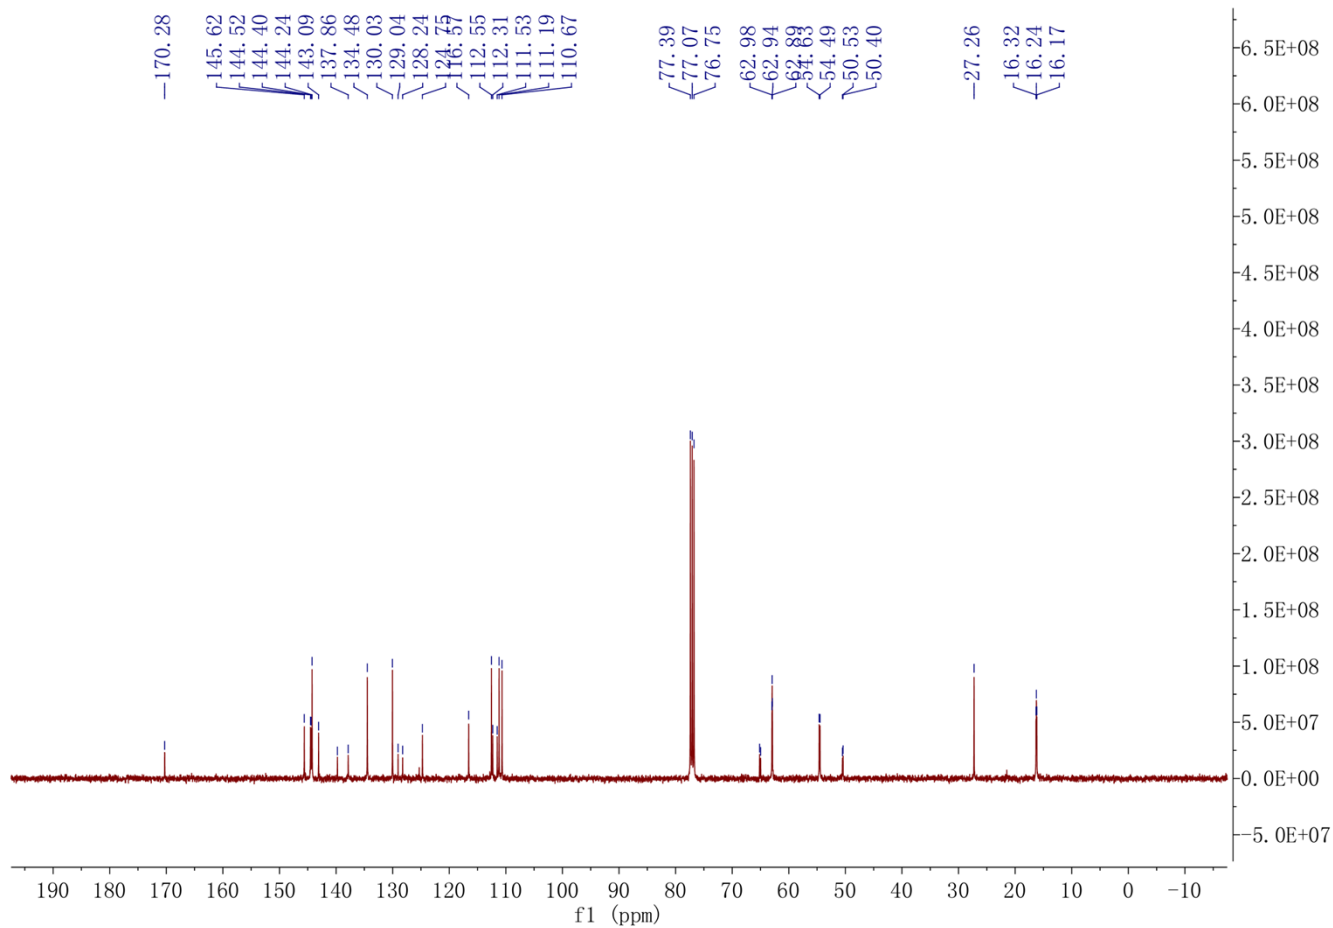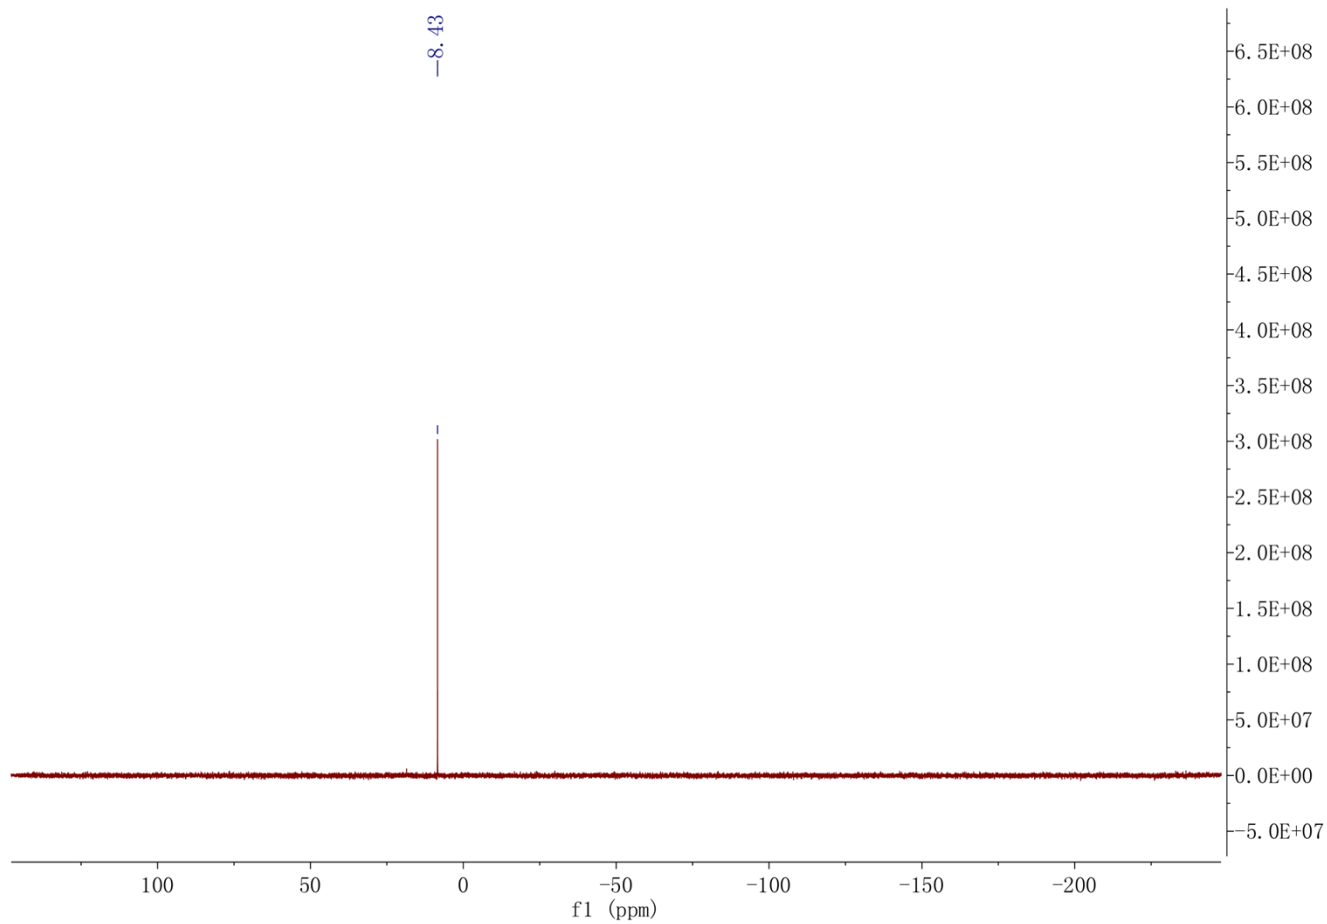

**Diethyl(5,5-dicyano-4-(furan-2-yl)-1',6'-dimethyl-2'-oxospiro[cyclopent[2]ene-1,3'-indolin]-3-yl)phosphonate (3t):**

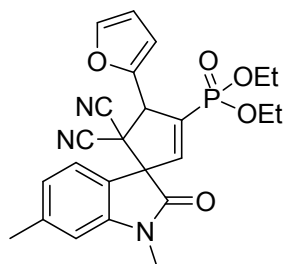

White solid; mp 181 °C.  $^1\text{H}$  NMR (400 MHz,  $\text{CDCl}_3$ ):  $\delta$  7.57 (s, 1H), 7.51 (d,  $J = 7.5$  Hz, 1H), 7.24 (d,  $J = 7.7$  Hz, 1H), 7.12 (t,  $J = 7.7$  Hz, 1H), 6.76 (d,  $J = 3.0$  Hz, 1H), 6.51 (d,  $J = 10.9$  Hz, 2H), 5.63 (s, 1H), 4.02-4.15 (m, 4H), 3.59 (s, 3H), 2.64 (s, 3H), 1.34 (t,  $J = 7.0$  Hz, 3H), 1.27 (t,  $J = 7.0$  Hz, 3H);  $^{13}\text{C}$  NMR (101 MHz,  $\text{CDCl}_3$ ):  $\delta$  171.59, 145.99, 145.67 (d,  $J = 12.4$  Hz), 144.10, 141.77, 137.96 (d,  $J = 191.5$  Hz), 135.28, 124.79, 123.77, 123.48, 120.90, 112.70, 112.37, 111.69, 111.11, 64.95 (d,  $J = 18.6$  Hz), 62.84 (t,  $J = 6.3$  Hz), 54.43 (d,  $J = 13.9$  Hz), 51.07 (d,  $J = 11.7$  Hz), 30.61, 19.07, 16.28 (d,  $J = 6.6$  Hz), 16.19 (d,  $J = 6.6$  Hz);  $^{31}\text{P}$  NMR (162 MHz,  $\text{CDCl}_3$ ):  $\delta$  8.90; HRMS calculated  $[\text{M}+\text{Na}]^+$  for  $\text{C}_{24}\text{H}_{24}\text{N}_3\text{O}_5\text{P}$ : 488.1351, found: 488.1353.

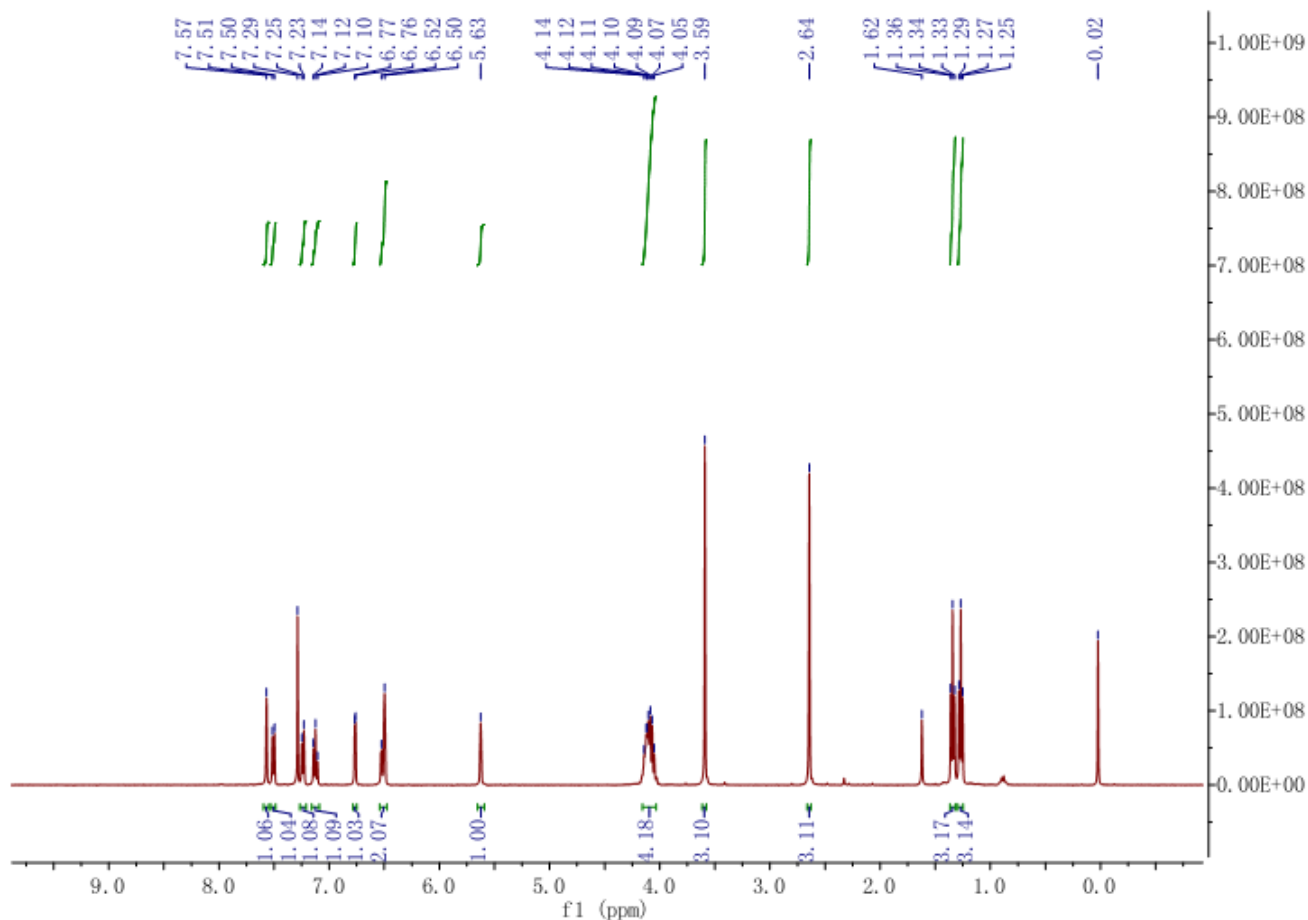



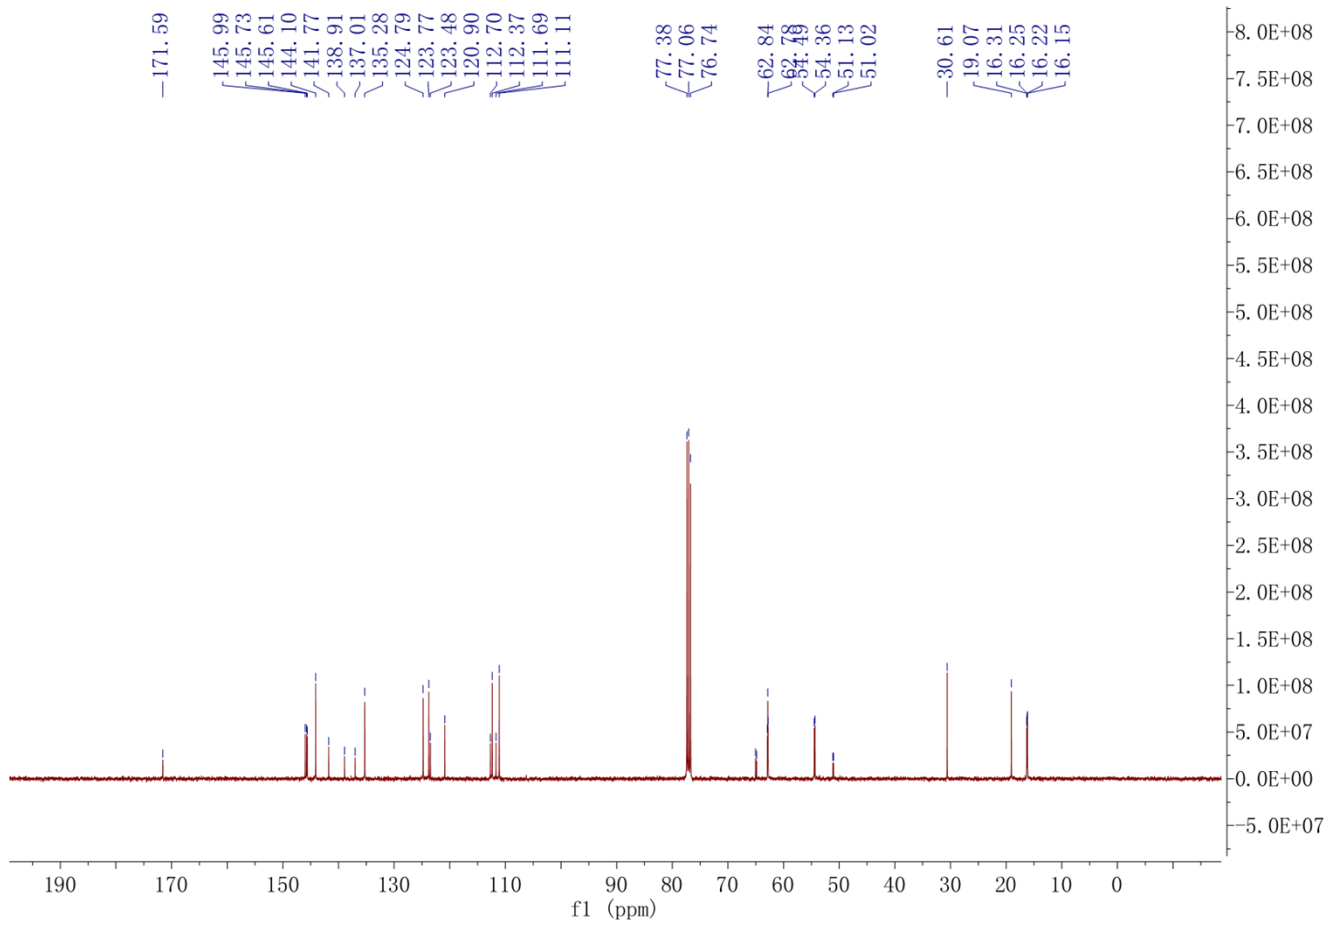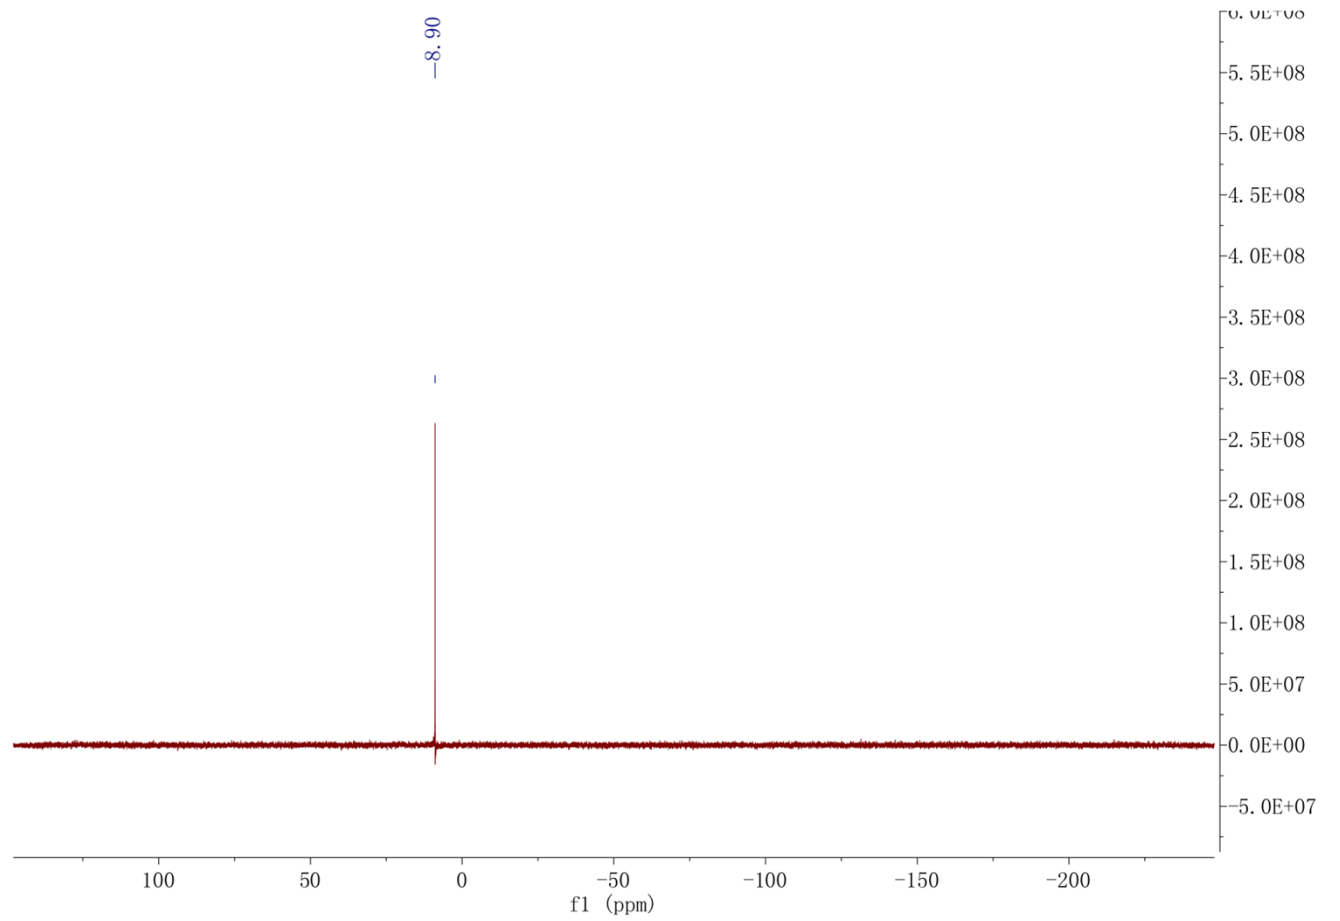

**Diethyl(5,5-dicyano-2'-oxo-4-phenylspiro[cyclopent[2]ene-1,3'-indolin]-3-yl)phosphonate (3u):**

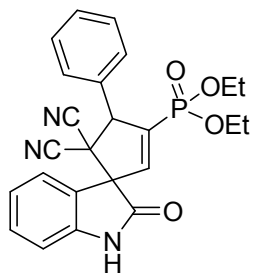

White solid; mp 253 °C.  $^1\text{H}$  NMR (400 MHz,  $\text{CDCl}_3$ ):  $\delta$  8.63 (s, 1H), 7.67 (d,  $J = 7.6$  Hz, 1H), 7.58 (d,  $J = 3.8$  Hz, 2H), 7.49 (d,  $J = 3.2$  Hz, 3H), 7.43 (t,  $J = 7.8$  Hz, 1H), 7.21 (t,  $J = 7.6$  Hz, 1H), 7.21 (t,  $J = 7.6$  Hz, 1H), 7.01 (d,  $J = 7.8$  Hz, 1H), 6.70 (d,  $J = 11.2$  Hz, 1H), 5.46 (s, 1H), 3.97-4.08 (m, 4H), 1.22 (q,  $J = 6.9$  Hz, 6H);  $^{13}\text{C}$  NMR (101 MHz, DMSO):  $\delta$  172.14, 146.54 (d,  $J = 12.8$  Hz), 142.84, 138.75, 136.88, 133.04, 131.27, 129.46, 129.07 (d,  $J = 140.7$  Hz), 126.64, 123.74, 122.57, 113.19, 112.13, 110.71, 65.75 (d,  $J = 19.1$  Hz), 62.42 (d,  $J = 6.0$  Hz), 62.19 (d,  $J = 5.9$  Hz), 59.99 (d,  $J = 16.0$  Hz), 52.35 (d,  $J = 12.8$  Hz), 15.93 (d,  $J = 6.3$  Hz), 15.75 (d,  $J = 6.2$  Hz);  $^{31}\text{P}$  NMR (162 MHz,  $\text{CDCl}_3$ ):  $\delta$  9.99; HRMS calculated  $[\text{M}+\text{Na}]^+$  for  $\text{C}_{24}\text{H}_{22}\text{N}_3\text{O}_4\text{P}$ : 470.1246, found: 470.1237.

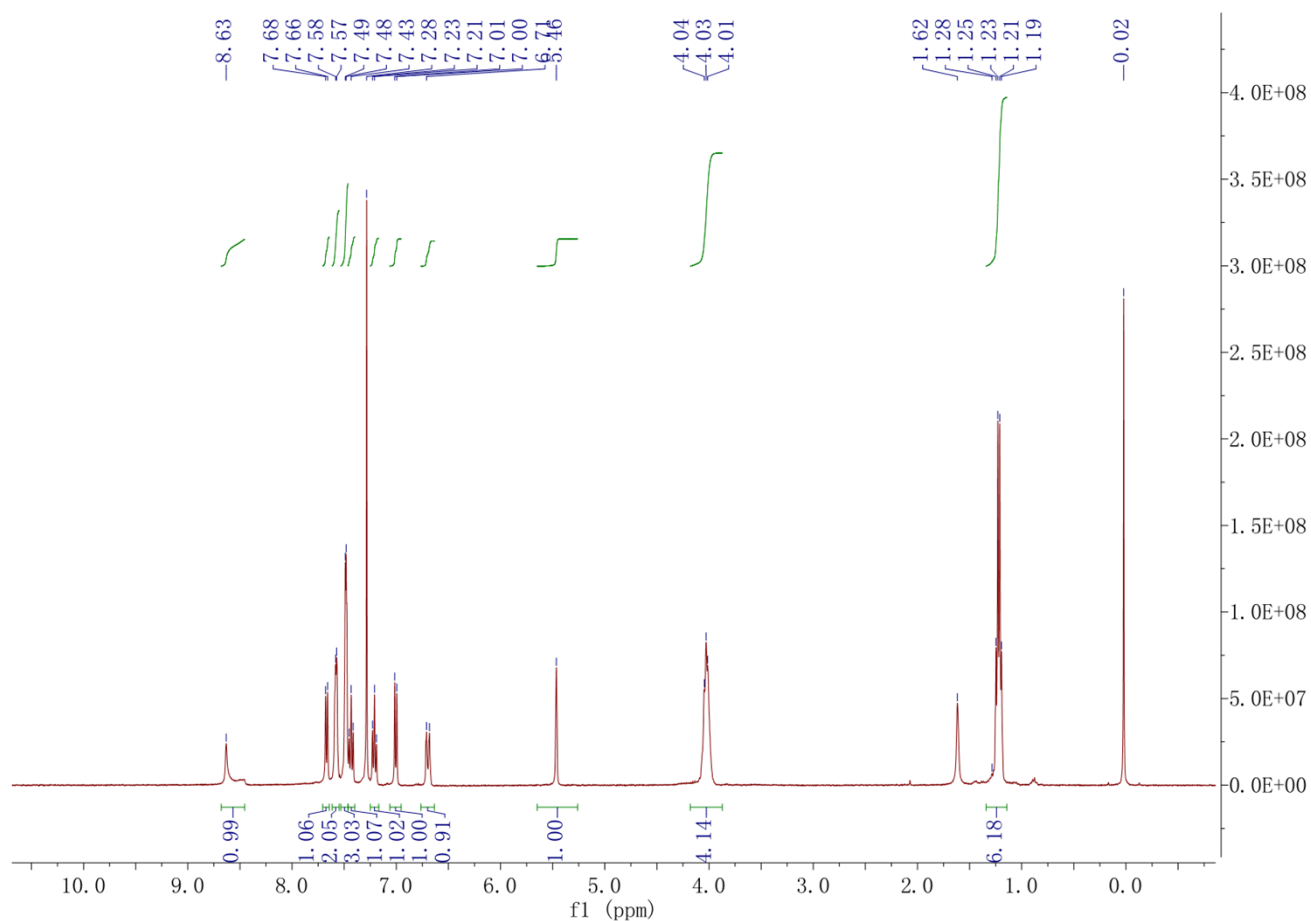

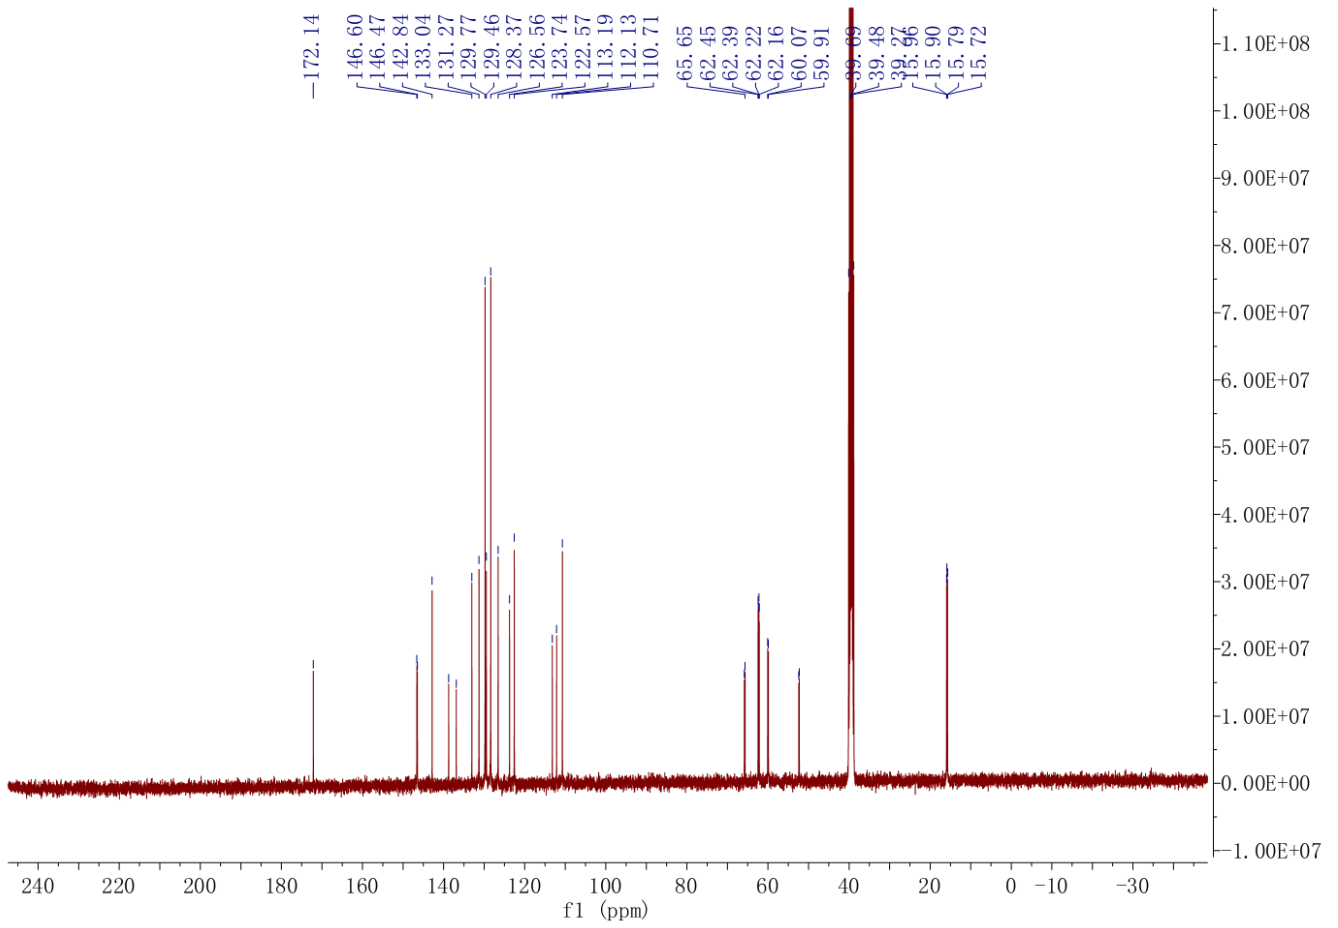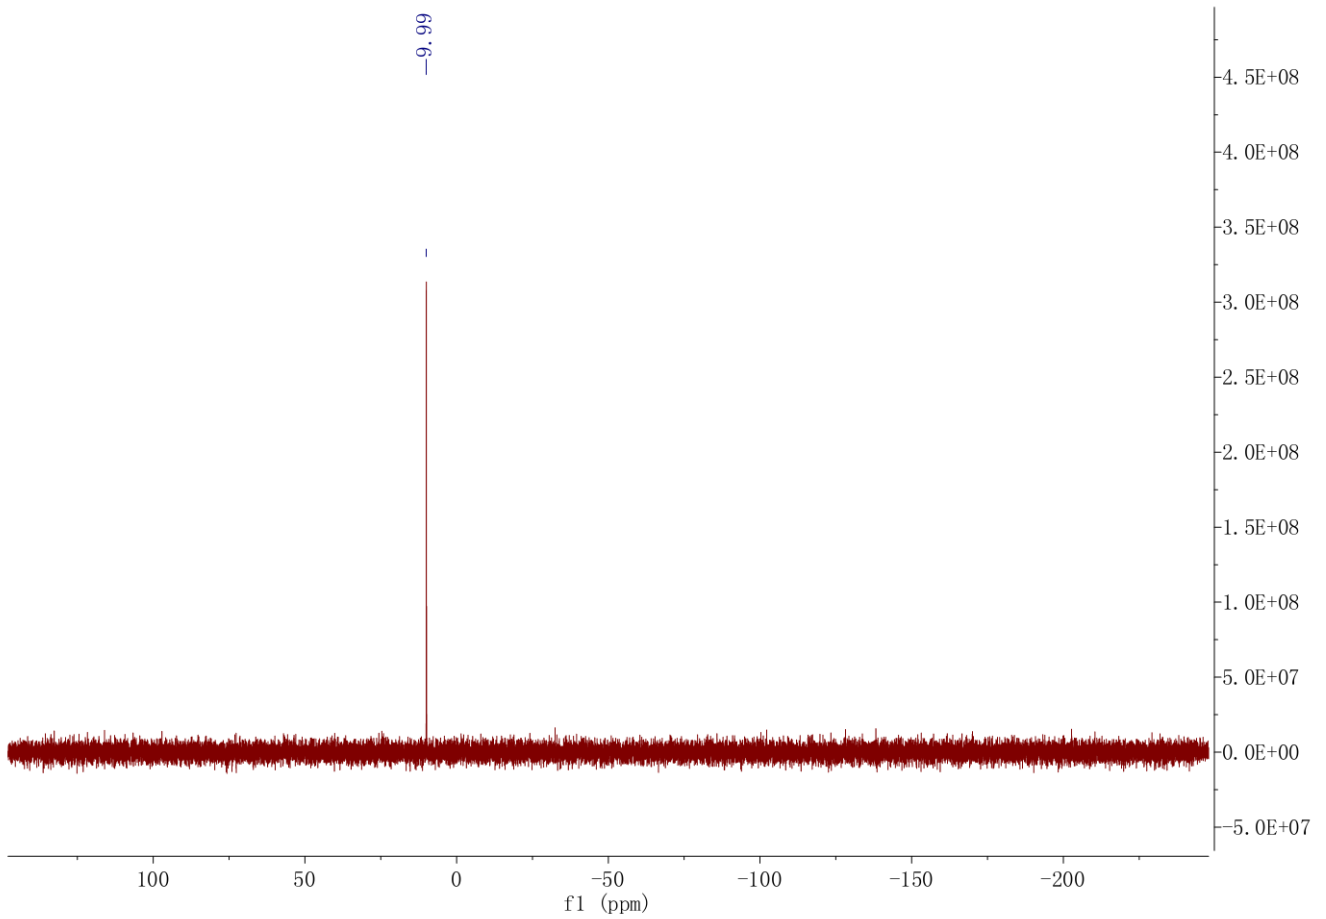

## Diethyl(1'-benzyl-5,5-dicyano-2'-oxo-4-phenylspiro[cyclopent[2]ene-1,3'-indolin]-3-yl)phosphonate

(3v):

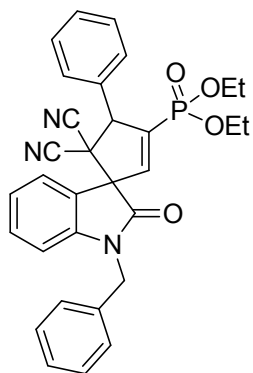

White solid; mp 168 °C.  $^1\text{H}$  NMR (400 MHz,  $\text{CDCl}_3$ ):  $\delta$  7.71 (d,  $J = 7.6$  Hz, 1H), 7.60-7.65 (m, 2H), 7.46-7.52 (m, 3H), 7.40 (dt,  $J = 15.3, 7.5$  Hz, 5H), 7.31-7.35 (m, 1H), 7.21 (t,  $J = 7.7$  Hz, 1H), 6.86 (d,  $J = 7.9$  Hz, 1H), 6.62 (dd,  $J = 11.0, 2.6$  Hz, 1H), 5.58 (s, 1H), 5.20 (d,  $J = 15.6$  Hz, 1H), 4.80 (d,  $J = 15.6$  Hz, 1H), 4.20 – 4.02 (m, 2H), 4.01 – 3.85 (m, 2H), 1.31 (t,  $J = 7.1$  Hz, 3H), 1.14 (t,  $J = 7.1$  Hz, 3H);  $^{13}\text{C}$  NMR (101 MHz,  $\text{CDCl}_3$ ):  $\delta$  171.24, 146.02 (d,  $J = 12.6$  Hz), 143.31, 140.26 (d,  $J = 190.6$  Hz), 134.35, 132.47, 131.34, 130.24, 129.77, 129.06, 128.56, 128.18, 127.58, 127.01, 123.94, 123.16, 112.91, 111.85, 110.28, 65.43 (d,  $J = 18.8$  Hz), 62.88 (d,  $J = 5.9$  Hz), 62.76 (d,  $J = 6.3$  Hz), 60.99 (d,  $J = 14.8$  Hz), 52.84 (d,  $J = 13.2$  Hz), 44.92, 16.24 (d,  $J = 6.3$  Hz), 16.04 (d,  $J = 6.8$  Hz);  $^{31}\text{P}$  NMR (162 MHz,  $\text{CDCl}_3$ ):  $\delta$  9.40; HRMS calculated  $[\text{M}+\text{Na}]^+$  for  $\text{C}_{31}\text{H}_{28}\text{N}_3\text{O}_4\text{P}$ : 560.1715, found: 560.1714.

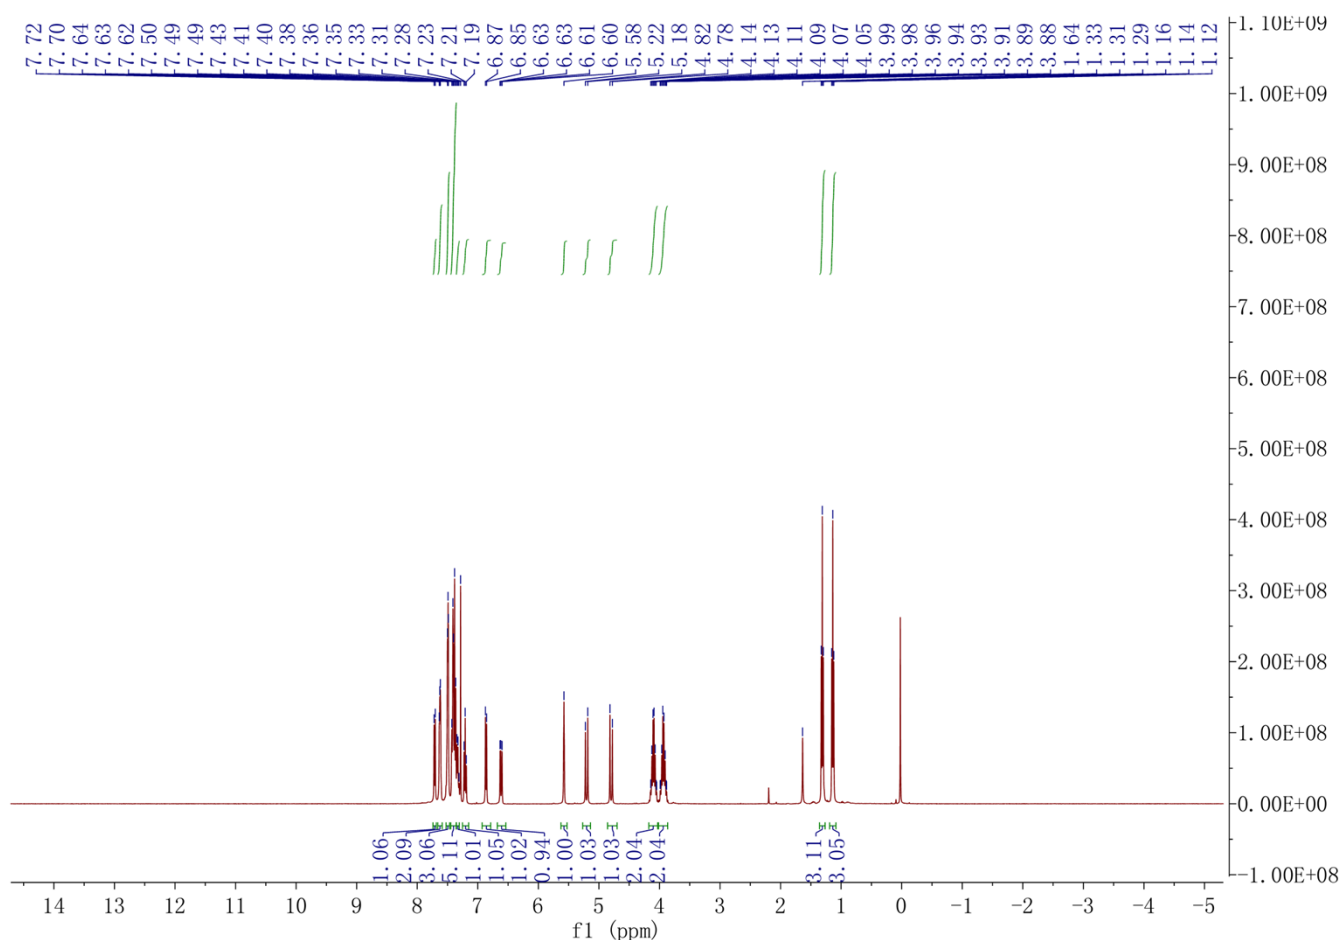

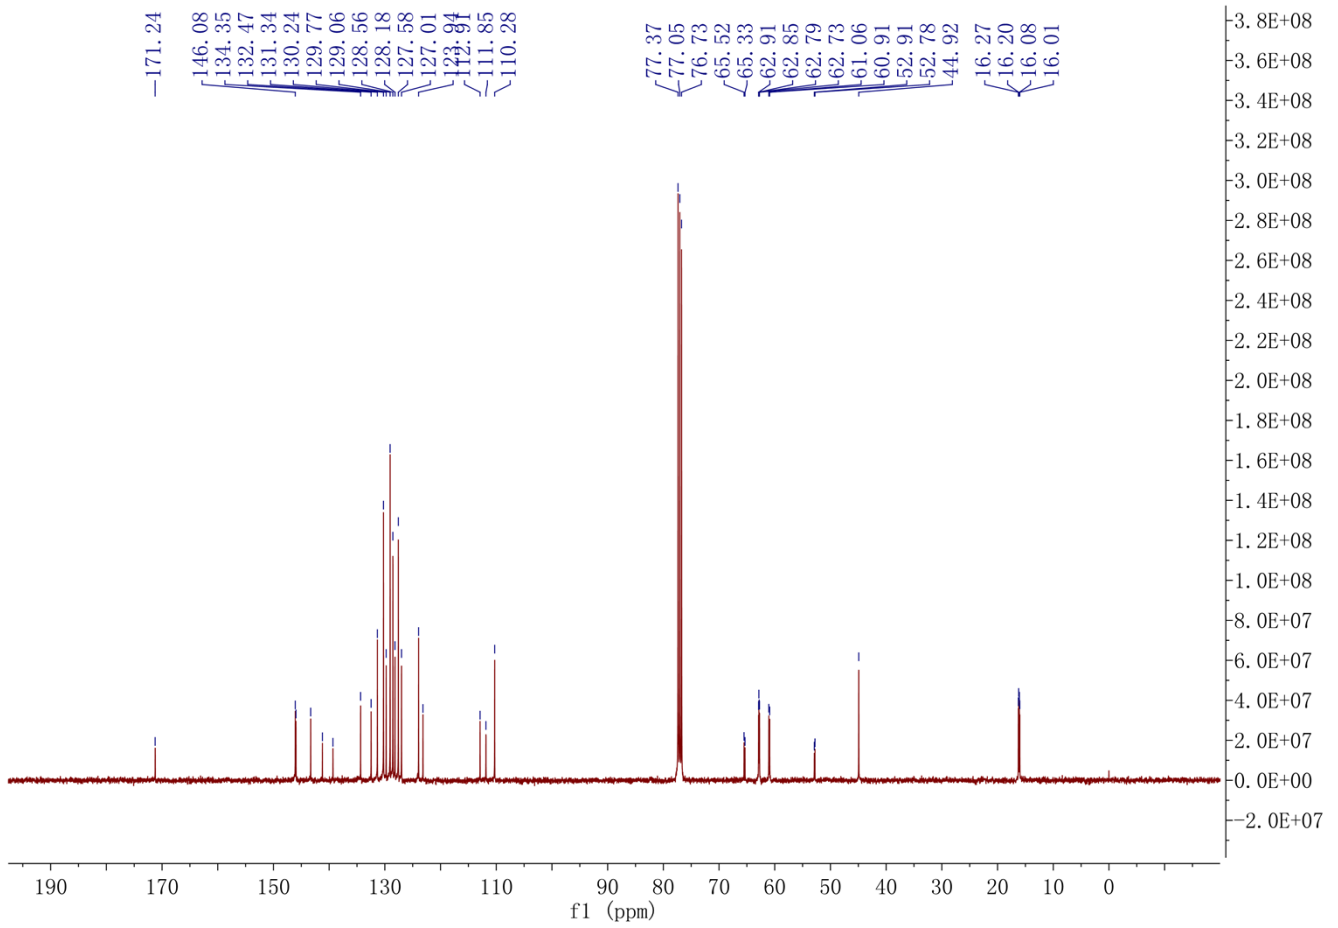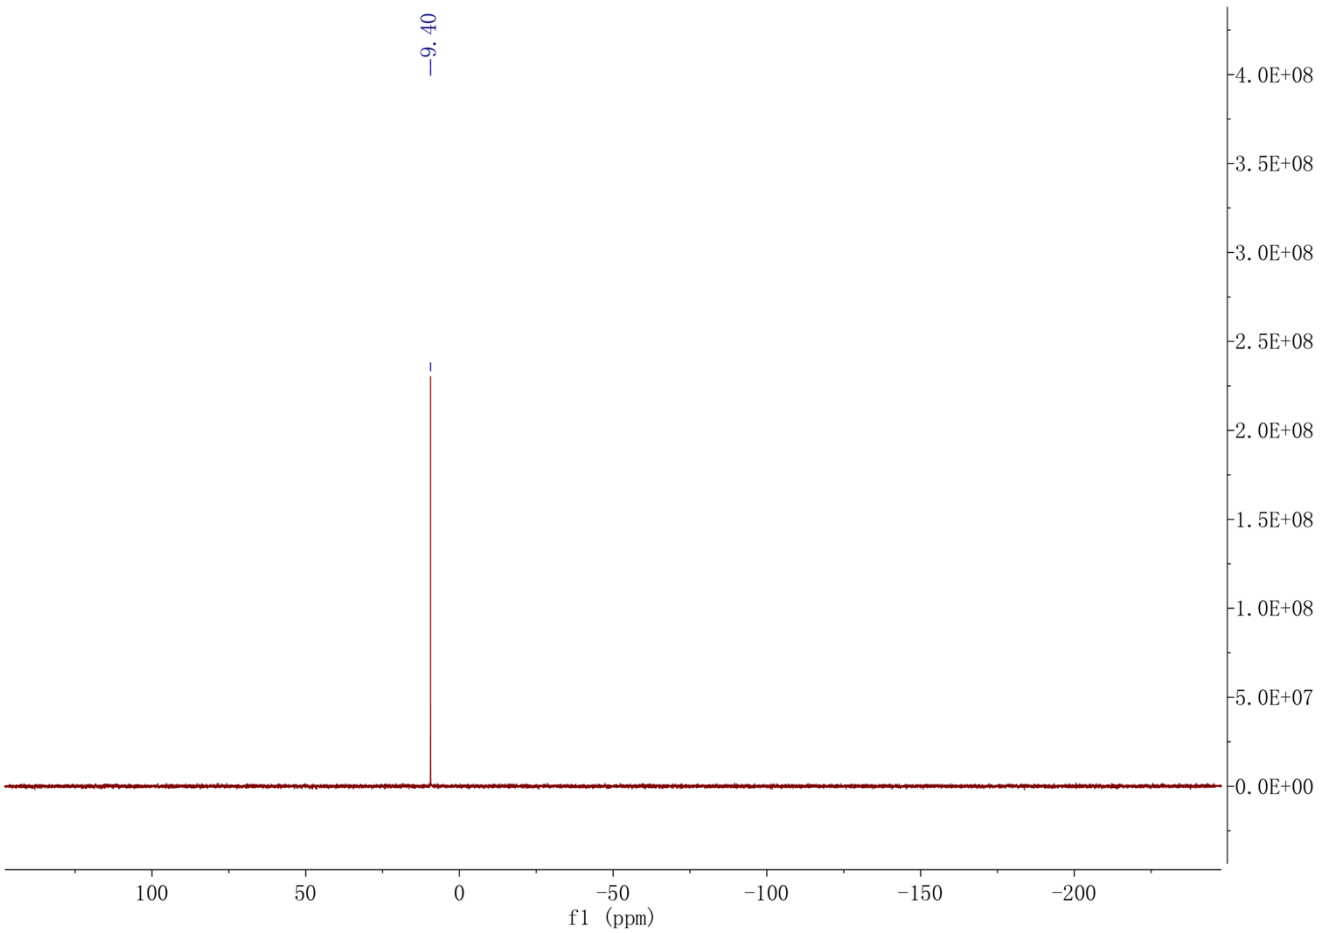

Single Crystal X-Ray Analysis **3a** (CCDC 993220 contains the supplementary crystallographic data for this paper. These data can be obtained free of charge by contacting The Cambridge Crystallographic Data Centre, 12, Union Road, Cambridge CB2 1EZ, UK; fax: +44 1223 336033; E-mail: [deposit@ccdc.cam.ac.uk](mailto:deposit@ccdc.cam.ac.uk).)

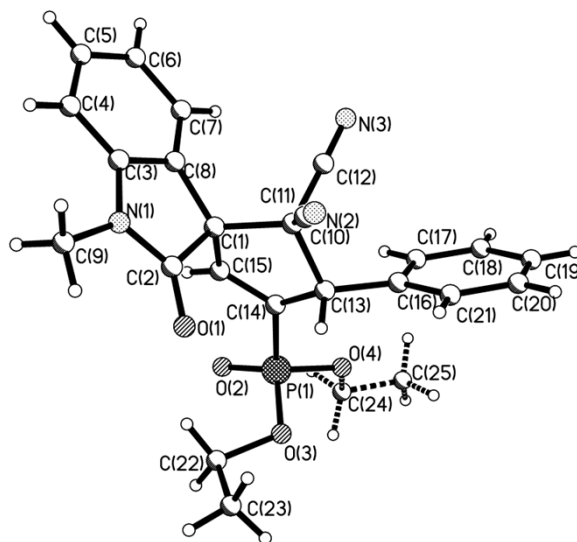

Table 1. Crystal data and structure refinement for shelxl.

|                             |                                                                 |                       |
|-----------------------------|-----------------------------------------------------------------|-----------------------|
| Identification code         | shelxl                                                          |                       |
| Empirical formula           | C <sub>25</sub> H <sub>24</sub> N <sub>3</sub> O <sub>4</sub> P |                       |
| Formula weight              | 461.44                                                          |                       |
| Temperature                 | 293(2) K                                                        |                       |
| Wavelength                  | 0.71073 Å                                                       |                       |
| Crystal system, space group | Monoclinic, P2 <sub>1</sub> /c                                  |                       |
| Unit cell dimensions        | a = 11.598(2) Å                                                 | alpha = 90 deg.       |
|                             | b = 12.442(3) Å                                                 | beta = 122.44(2) deg. |
|                             | c = 19.597(6) Å                                                 | gamma = 90 deg.       |
| Volume                      | 2386.6(10) Å <sup>3</sup>                                       |                       |
| Z, Calculated density       | 4, 1.284 Mg/m <sup>3</sup>                                      |                       |
| Absorption coefficient      | 0.151 mm <sup>-1</sup>                                          |                       |
| F(000)                      | 968                                                             |                       |
| Crystal size                | 0.30 x 0.14 x 0.12 mm                                           |                       |

|                                   |                                             |
|-----------------------------------|---------------------------------------------|
| Theta range for data collection   | 2.05 to 25.02 deg.                          |
| Limiting indices                  | -13<=h<=13, -14<=k<=14, -23<=l<=23          |
| Reflections collected / unique    | 19606 / 4210 [R(int) = 0.0603]              |
| Completeness to theta = 25.02     | 100.0 %                                     |
| Absorption correction             | Semi-empirical from equivalents             |
| Max. and min. transmission        | 0.9821 and 0.9561                           |
| Refinement method                 | Full-matrix least-squares on F <sup>2</sup> |
| Data / restraints / parameters    | 4210 / 128 / 337                            |
| Goodness-of-fit on F <sup>2</sup> | 0.961                                       |
| Final R indices [I>2sigma(I)]     | R1 = 0.0530, wR2 = 0.1311                   |
| R indices (all data)              | R1 = 0.0812, wR2 = 0.1498                   |
| Extinction coefficient            | 0.035(3)                                    |
| Largest diff. peak and hole       | 0.270 and -0.227 e.A <sup>-3</sup>          |
